# Supplementary material
Source: Royal Society of Chemistry journal article supplement (doi:10.1039/d6gc00995f)

## Supporting Information

### Electrochemical Site-Selective C(sp<sup>3</sup>)-H Heteroarylation of Proline- Containing Peptides

Gaochen Liu,<sup>†</sup> Hui Zhou,<sup>†</sup> Xing Liu, Bingchuan Hong, Jing Zhou\*

#### Contents

|                                              |    |
|----------------------------------------------|----|
| 1. General methods .....                     | 2  |
| 2. Experimental procedures .....             | 2  |
| 3. Optimization of reaction conditions ..... | 8  |
| 4. Mechanistic investigations .....          | 12 |
| 5. Characterization of products.....         | 14 |
| 6. Copies of NMR spectra .....               | 31 |

## 1. General methods

All reagents were obtained from commercial suppliers and used without further purification. Pentapeptides and hexapeptides are synthesized using SPPS. The reactions were monitored by TLC (thin layer chromatography). Column chromatography was performed using silica gel (300-400 mesh). <sup>1</sup>H NMR spectra were recorded on commercial instruments (600 MHz or 400 MHz). Chemical shifts were reported in ppm from tetramethylsilane with the solvent resonance as the internal standard (CDCl<sub>3</sub>, δ = 7.26). <sup>13</sup>C NMR spectra were collected on commercial instruments (151 MHz) with complete proton decoupling. Chemical shifts are reported in ppm from the tetramethylsilane with the solvent resonance as internal standard (CDCl<sub>3</sub>, δ = 77.0). The following abbreviations were used to explain the multiplicities: s = singlet, d = doublet, t = triplet, m = multiplet, dd = doublet of doublets, q = quartet, dt = doublet of triplets, td = triplet of doublets.

## 2. Experimental procedures

### 2.1 The general procedure for electrochemical reaction

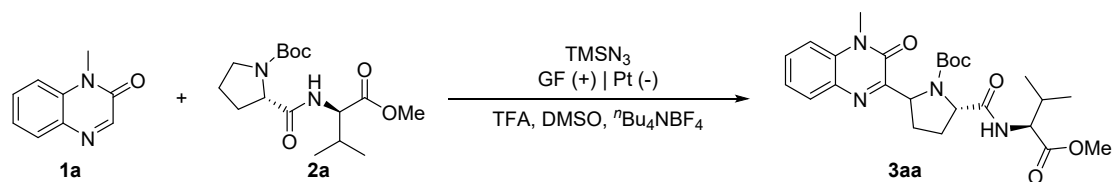

To an undivided cell (10 mL) were added quinoxalin-2(1H)-one (**1a**, 0.1 mmol, 1.0 equiv.), (L)-Boc-Pro-Val-OMe (**2a**, 0.3 mmol, 3.0 equiv.), TMSN<sub>3</sub> (23 mg, 26 μL, 0.2 mmol, 2.0 equiv.), TFA (45 mg, 30 μL, 0.4 mmol, 4.0 equiv.), <sup>n</sup>Bu<sub>4</sub>NBF<sub>4</sub> (130 mg, 0.4 mmol, 0.1 M), DMSO (4 mL). The cell was equipped with graphite felt as anode (10 mm×15 mm) and platinum plate electrode (10 mm×15 mm) as cathode. The reaction mixture was stirred and electrolyzed at a constant current (5 mA) under air at room temperature for 8 h. After the reaction was completed, the mixture was diluted with water (20 mL) and then extracted with ethyl acetate (3×30 mL). The combined organic phases were dried over anhydrous Na<sub>2</sub>SO<sub>4</sub>, filtered, concentrated in vacuo and the crude product was obtained. The pure product was obtained by silica gel chromatography using petroleum ether/EtOAc (2:1) as the eluent.

## 2.2 Gram-scale synthesis of 3aa

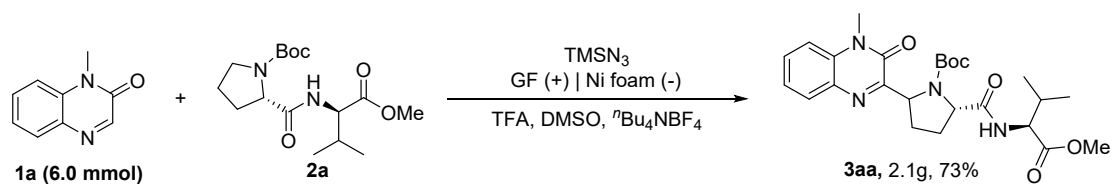

To an undivided cell (100 mL) were added quinoxalin-2(1*H*)-one (**1a**, 6.0 mmol, 1.0 equiv.), (*L*)-Boc-Pro-Val-OMe (**2a**, 18 mmol, 3.0 equiv.), TMSN<sub>3</sub> (1.38 g, 1.56 mL, 12 mmol, 2.0 equiv.), TFA (2.73 g, 1.8 mL, 24 mmol, 4.0 equiv.), *n*Bu<sub>4</sub>NBF<sub>4</sub> (1.98 g, 6.0 mmol, 0.1 M), DMSO (60 mL). The flask was equipped with graphite felt as anode (35 mm×35 mm) and Ni foam (35 mm×35 mm) as cathode. The reaction mixture was stirred and electrolyzed at a constant current (30 mA) under air at room temperature for 45 h. After the reaction was completed, the mixture was diluted with water (200 mL) and then extracted with ethyl acetate (3×200 mL). The combined organic phases were dried over anhydrous Na<sub>2</sub>SO<sub>4</sub>, filtered, concentrated in vacuo and the crude product was obtained. The pure product was obtained by silica gel chromatography using petroleum ether/EtOAc (2:1) as the eluent.

## 2.3 General Procedure for peptide coupling

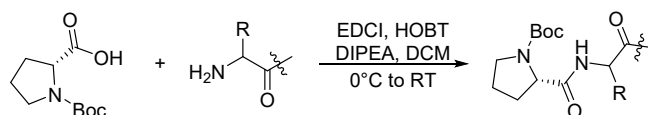

Coupling of (*L*)-Boc-Pro-OH to (*L*)-H-AA-OMe. (*L*)-H-AA-OMe (1.0 equiv., 4.6 mmol) was weighed into a round bottom flask with a stir bar, diluted with CH<sub>2</sub>Cl<sub>2</sub> (0.1-0.2 M), and cooled to 0 °C in an ice bath. To this solution was added *N,N*-Diisopropylethylamine (DIPEA) (1.0 equiv., 4.6 mmol) dropwise. Next were added, in the following order: 1) (*L*)-Boc-Pro-OH (1.0 equiv., 4.6 mmol), 2) hydroxybenzotriazole (HOBt, 1.1 equiv., 5.06 mmol), and 3) 1-ethyl-3-(3-dimethylaminopropyl)carbodiimide hydrochloride (EDCI, 1.0 equiv., 4.6 mmol) and the reaction was warmed to room temperature. The reaction was then stirred overnight or until complete consumption of the carboxylic acid coupling partner was observed by TLC. The reaction contents were added to an appropriately sized separatory funnel and washed with a 1:1 volume each of NaHCO<sub>3</sub> (sat. aq.), citric acid (10 wt% aq.), and

brine. Following each of the first two washes, the aqueous layer was extracted with  $\text{CH}_2\text{Cl}_2$  ( $2 \times 30$  mL), and the combined organic layers were taken on to the next wash. The combined organic layers were then dried over  $\text{Na}_2\text{SO}_4$ , filtered, and concentrated in vacuo to provide the crude which was taken on without further purification to the next step. The crude material can alternatively be purified via flash chromatography on silica gel to afford the desired product.

#### 2.4 General Procedure for methyl ester hydrolysis

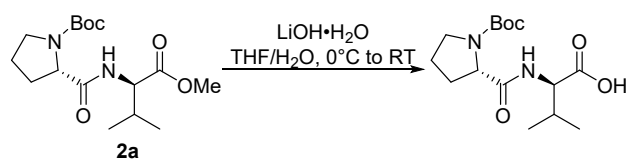

To a glass round-bottom flask with teflon stir bar was added (*L*)-Boc-Pro-Val-OMe **2a** (1.0 equiv.) in 3:1 THF:H<sub>2</sub>O (0.5 M). The solution was cooled to 0 °C in an ice bath, and LiOH (5.0 equiv.) was added in one portion. The reaction was held at 0 °C for 10 minutes, and then warmed to room temperature and stirred for 24 hours, or until complete conversion of the methyl ester was observed by TLC.

Upon complete conversion, the reaction was cooled back down to 0 °C, and acidified to a pH of 4-5, was re-acidified with KHSO<sub>4</sub> (10 wt% aq.) to pH <2 via dropwise addition of KHSO<sub>4</sub> (10 wt% aq.). The solution was then diluted with ethyl acetate (~1:1 v/v) and the two layers were separated via separatory funnel. The pH of the aqueous layer was then taken, and if found to be >4-5, was re-acidified with KHSO<sub>4</sub> (10 wt% aq.) to pH <2. It was then extracted with ethyl acetate ( $2 \times 30$  mL), making sure to retain an acidic pH before extraction each time. The organic layers were combined and washed with water ( $1 \times 30$  mL) and brine ( $1 \times 30$  mL), dried over  $\text{Na}_2\text{SO}_4$ , filtered, and concentrated in vacuo to afford crude (*L*)-Boc-Pro-Val-OH (87% over two steps). The acid materials were typically obtained in >90% purity and carried on crude to further peptide coupling steps, but can also be purified via flash chromatography on silica gel.

## 2.5 General Procedure for tripeptides coupling

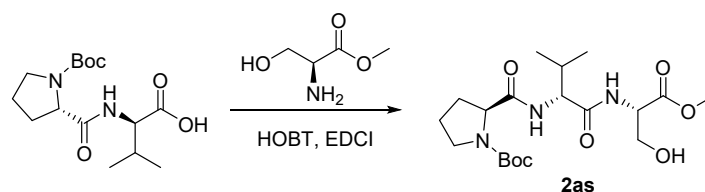

Crude (*L*)-Boc-Pro-Val-OH (1.0 equiv., 4.6 mmol) was coupled with (*L*)-Serine methyl ester hydrochloride (1.0 equiv., 4.6 mmol) using DIPEA (1.0 equiv., 4.6 mmol), HOBT (1.1 equiv., 5.06 mmol) and EDCI (1.0 equiv., 4.6 mmol) according to the general procedure for peptide coupling.

## 2.6 Solid-Phase Peptide Synthesis (SPPS):

Using 2-chlorotrityl chloride resin. Inside each peptide synthesis tube were manually added 70 mg of resin (1.0 equiv.), followed by the chosen C-terminal Fmoc-protected monomer (4.0 equiv.), DIPEA (6.0 equiv.) and dichloromethane (0.04 M). The tube were shaken for 2 hours and the resin was washed with dimethylformamide (5×3.0 mL) and dichloromethane (5×3.0 mL). Capping was performed using a mixture Ac<sub>2</sub>O:2,6-lutidine:DMF (5:6:89) and the resin was washed with dimethylformamide (4×3.0 mL). Fmoc protecting group was then removed by shaking the resin with 20% v/v piperidine in dimethylformamide at 400 rpm 5 minutes. After dimethylformamide (5×3.0 mL) and dichloromethane (5×3.0 mL) washes, the next coupling was carried out by shaking the resin with the chosen Fmoc-protected monomer (0.32 mmol, 4.0 equiv.), 1 [bis(dimethylamino)methylene]-1H-1,2,3-triazolo[4,5-b]pyridinium 3-oxide hexafluorophosphate (4.0 equiv.) and 4-methylmorpholine (NMM, 6.0 equiv.) in dimethylformamide (6.0 mM) at 400 rpm 30 minutes. The capping, Fmoc removal and coupling steps were repeated 4 or 5 times to obtain pentamers and hexamers, respectively.

## 2.7 General procedure for the methylation of amino acids and peptides

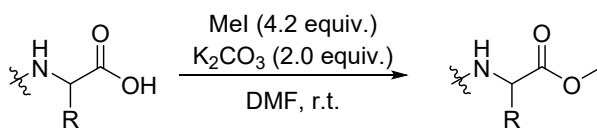

Potassium carbonate (2.0 equiv.) was added to a stirred solution of the chosen free acid (1.0 equiv.) in anhydrous dimethylformamide (0.6 M). To this suspension, a solution of iodomethane (4.2 equiv.) in anhydrous dimethylformamide (2.5 M) was added dropwise using a syringe. The reaction was stirred at room temperature overnight under a nitrogen atmosphere. The solvent was then removed under reduced pressure and the crude mixture was dissolved in ethyl acetate, washed with water and brine several times and extracted twice. The combined organic layers were dried over anhydrous magnesium sulfate, filtered, and concentrated under reduced pressure to afford the desired compound which was used without any further purification.

## 2.8 Preparation of substrates 1a

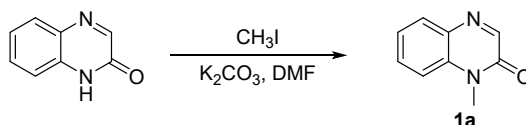

To a suspension of quinoxalinone (1.0 equiv.) in DMF was added potassium carbonate (1.2 equiv.) and the corresponding  $\text{CH}_3\text{I}$  (1.6 equiv.). The mixture was stirred at room temperature overnight. After the completion (as indicated by TLC), The mixture was then extracted with ethyl acetate and the collected organic layer was washed with brine, dried with  $\text{Na}_2\text{SO}_4$ , filtered and evaporated under reduced pressure. The residue was purified by flash chromatography over silica gel to afford the desired product.

## 2.9 Synthesis of substrates

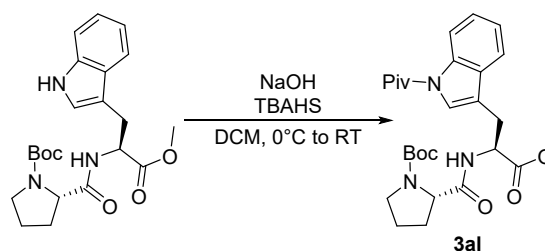

To a solution of (*L*)-Boc-Pro-Trp-OMe (1.0 equiv.) in anhydrous dichloromethane (10 mL), NaOH (graininess, 2.0 equiv.) and TBAHS (tetrabutylammonium hydrogen sulfate, 0.1 equiv.) were added at 0 °C. The mixture was stirred for 30 minutes, and then PivCl (3.0 equiv.) was added slowly. The mixture was stirred for an additional 2 hours and gradually warmed to room temperature. After the completion of the reaction, it was quenched by adding a saturated solution of ammonium chloride. 10 mL of dichloromethane was added to the reaction mixture. The organic layer was separated, and then it was washed with a saturated solution of sodium chloride. Subsequently, the organic layer was dried using anhydrous Na<sub>2</sub>SO<sub>4</sub> and evaporated to dryness. The crude product can also be purified via flash chromatography on silica gel.

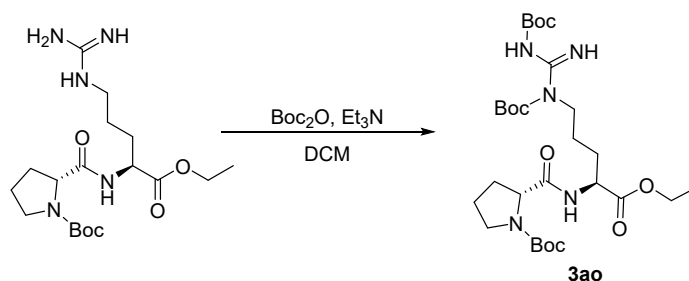

To a suspension of (*L*)-Boc-Pro-Arg-OEt (1.0 equiv.) in CH<sub>2</sub>Cl<sub>2</sub> (130 mL) at room temperature were added triethylamine (Et<sub>3</sub>N, 3.0 equiv.) and *di-tert-butyl* dicarbonate (Boc<sub>2</sub>O, 3.0 equiv.). The reaction mixture was stirred vigorously at room temperature overnight. Upon completion, the reaction mixture was transferred to a separatory funnel. The organic layer was washed with sat. aqueous NaHCO<sub>3</sub> (2×20 mL), aqueous NH<sub>4</sub>Cl (1×20 mL), water (1×20 mL), and brine (1×20 mL). The organic layer was dried over Na<sub>2</sub>SO<sub>4</sub>, filtered, and concentrated under reduced pressure. The resultant crude residue was purified by flash column chromatography to give as a colorless solid.

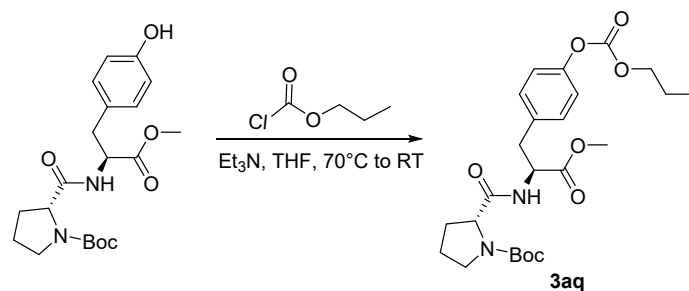

To a solution of (*L*)-Boc-Pro-Tyr-OMe (1.0 equiv.) in THF (0.1 M) was added anhydrous Et<sub>3</sub>N (2.0 equiv.) followed by propyl chloroformate (1.3 equiv.). The reaction mixture was heated at reflux overnight. After cooling to room temperature, the reaction mixture was filtered, concentrated, redissolved in DCM, washed with water and then dried over Na<sub>2</sub>SO<sub>4</sub> and concentrated in vacuo. Purification by column chromatography.

### 3 Optimization of reaction conditions

#### 3.1 Effects of current on the reaction<sup>[a]</sup>

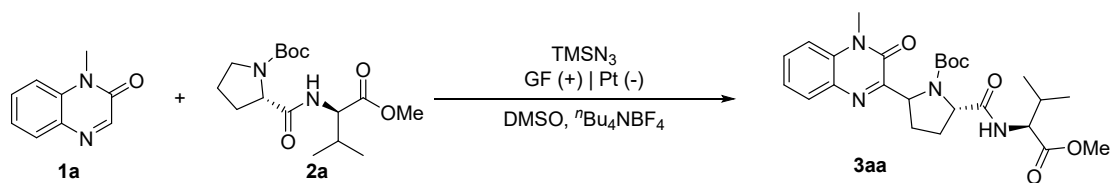

| Entry | I (mA) | Yield (%) <sup>[b]</sup> |
|-------|--------|--------------------------|
| 1     | 3      | 16                       |
| 2     | 5      | 20                       |
| 3     | 7      | 18                       |

<sup>[a]</sup>Reaction conditions: **1a** (0.1 mmol), **2a** (0.1 mmol), TMSN<sub>3</sub> (0.2 mmol), <sup>n</sup>Bu<sub>4</sub>NBF<sub>4</sub> (0.1 M), and DMSO (4 mL) in an undivided cell under a constant current in air at rt for 8 h. <sup>[b]</sup>Isolated yield.

#### 3.2 Effects of different solvent on the reaction<sup>[a]</sup>

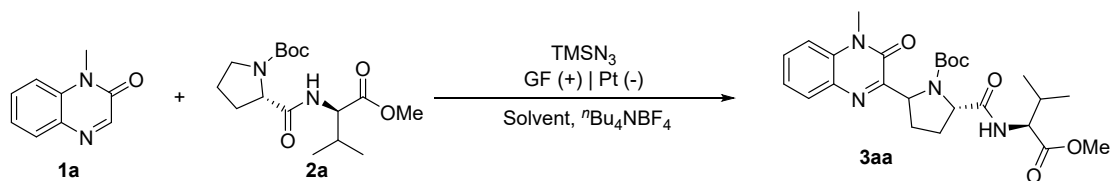

| Entry | Solvent | Yield (%) <sup>[b]</sup> |
|-------|---------|--------------------------|
| 1     | DCE     | Trace                    |

|   |                    |       |
|---|--------------------|-------|
| 2 | DMF                | Trace |
| 3 | CH <sub>3</sub> CN | Trace |

<sup>[a]</sup>Reaction conditions: **1a** (0.1 mmol), **2a** (0.1 mmol), TMSN<sub>3</sub> (0.2 mmol), <sup>n</sup>Bu<sub>4</sub>NBF<sub>4</sub> (0.1 M), and solvent (4 mL) in an undivided cell under a constant current of 5 mA in air at rt for 8 h. <sup>[b]</sup>Isolated yield.

### 3.3 Effects of different electrode materials on the reaction<sup>[a]</sup>

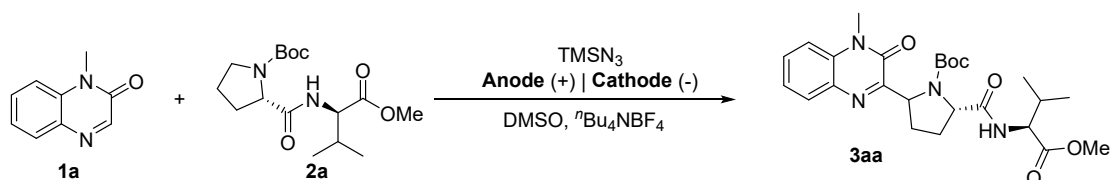

| Entry | electrode materials            | Yield (%) <sup>[b]</sup> |
|-------|--------------------------------|--------------------------|
| 1     | GF(+) nickel foam(-)           | Trace                    |
| 2     | Carbon paper(+) nickel foam(-) | 16                       |

<sup>[a]</sup>Reaction conditions: **1a** (0.1 mmol), **2a** (0.1 mmol), TMSN<sub>3</sub> (0.2 mmol), <sup>n</sup>Bu<sub>4</sub>NBF<sub>4</sub> (0.1 M), and DMSO (4 mL) in an undivided cell under a constant current of 5 mA in air at rt for 8 h. <sup>[b]</sup>Isolated yield.

### 3.4 Effects of different HAT on the reaction<sup>[a]</sup>

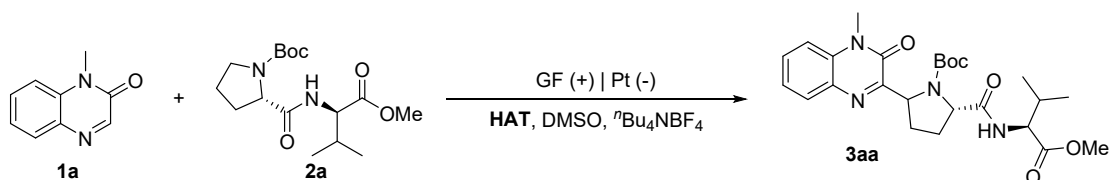

| Entry | HAT                            | Yield (%) <sup>[b]</sup> |
|-------|--------------------------------|--------------------------|
| 1     | TMSN <sub>3</sub>              | 20                       |
| 2     | TEMPO                          | Trace                    |
| 3     | NHPI                           | 10                       |
| 4     | Quinuclidine                   | 18                       |
| 5     | Triethylenediamine             | Trace                    |
| 6     | Bu <sub>4</sub> N <sub>3</sub> | Trace                    |

<sup>[a]</sup>Reaction conditions: **1a** (0.1 mmol), **2a** (0.1 mmol), HAT reagent (0.2 mmol), <sup>n</sup>Bu<sub>4</sub>NBF<sub>4</sub> (0.1 M), and DMSO (4 mL) in an undivided cell under a constant current of 5 mA in air at rt for 8 h. <sup>[b]</sup>Isolated yield.

### 3.5 Effects of different additives on the reaction<sup>[a]</sup>

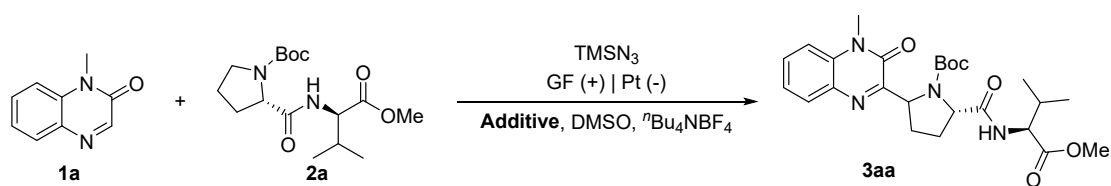

| Entry | Acid additive        | Yield (%) <sup>[b]</sup> |
|-------|----------------------|--------------------------|
| 1     | TFA                  | 34                       |
| 2     | TFE                  | Trace                    |
| 3     | HFIP                 | Trace                    |
| 4     | CH <sub>3</sub> OH   | 10                       |
| 5     | CH <sub>3</sub> COOH | 30                       |

<sup>[a]</sup>Reaction conditions: **1a** (0.1 mmol), **2a** (0.1 mmol), TMSN<sub>3</sub> (0.2 mmol), <sup>n</sup>Bu<sub>4</sub>NBF<sub>4</sub> (0.1 M), additive (0.2 mmol) and DMSO (4 mL) in an undivided cell under a constant current of 5 mA in air at rt for 8 h. <sup>[b]</sup>Isolated yield.

### 3.6 Effects of different additives concentration on the reaction<sup>[a]</sup>

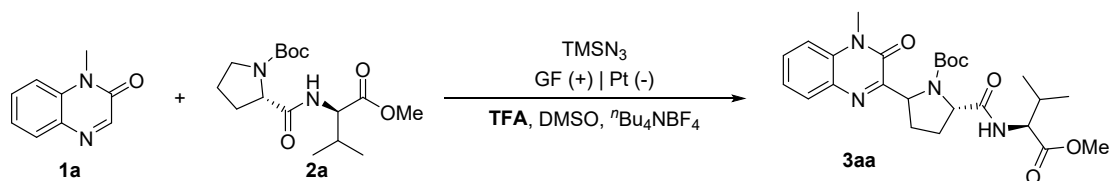

| Entry | TFA (mmol) | Yield (%) <sup>[b]</sup> |
|-------|------------|--------------------------|
| 1     | 0.2        | 34                       |
| 2     | 0.4        | 40                       |
| 3     | 0.6        | 33                       |

<sup>[a]</sup>Reaction conditions: **1a** (0.1 mmol), **2a** (0.1 mmol), TMSN<sub>3</sub> (0.2 mmol), <sup>n</sup>Bu<sub>4</sub>NBF<sub>4</sub> (0.1 M), TFA (x mmol) and DMSO (4 mL) in an undivided cell under a constant current of 5 mA in air at rt for 8 h. <sup>[b]</sup>Isolated yield.

### 3.7 Effects of electrolytes on the reaction<sup>[a]</sup>

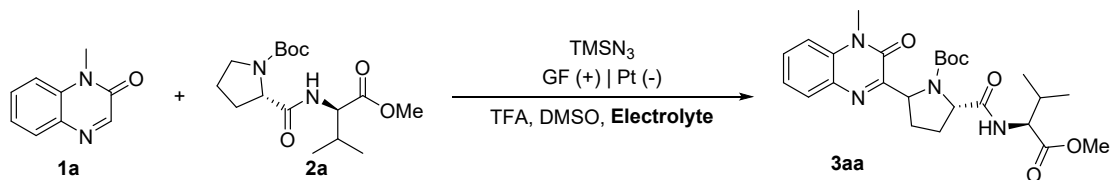

| Entry | Electrolyte                                    | Yield (%) <sup>[b]</sup> |
|-------|------------------------------------------------|--------------------------|
| 1     | <sup>n</sup> Et <sub>4</sub> NBF <sub>4</sub>  | 35                       |
| 2     | <sup>n</sup> Bu <sub>4</sub> NClO <sub>4</sub> | 41                       |
| 3     | <sup>n</sup> Bu <sub>4</sub> NCl               | 34                       |
| 4     | <sup>n</sup> Bu <sub>4</sub> NOAc              | 26                       |

<sup>[a]</sup>Reaction conditions: **1a** (0.1 mmol), **2a** (0.1 mmol), TMSN<sub>3</sub> (0.2 mmol), electrolyte (0.1 M), TFA (0.4 mmol) and DMSO (4 mL) in an undivided cell under a constant current of 5 mA in air at rt for 8 h. <sup>[b]</sup>Isolated yield.

### 3.8 Effects of substrate ratio on the reaction<sup>[a]</sup>

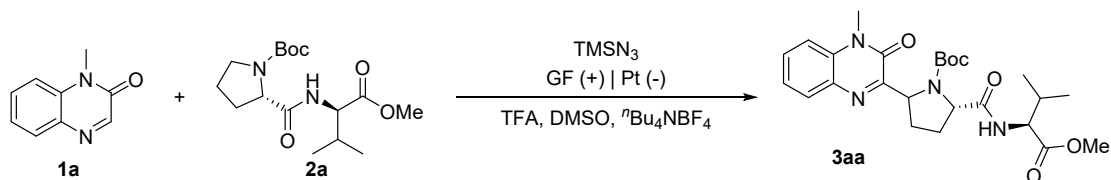

| Entry | Amounts of <b>1/2</b> (mmol) | Yield (%) <sup>[b]</sup> |
|-------|------------------------------|--------------------------|
| 1     | 0.1: 0.1                     | 40                       |
| 2     | 0.1: 0.2                     | 75                       |
| 3     | 0.1: 0.3                     | 85                       |

<sup>[a]</sup>Reaction conditions: **1a** (0.1 mmol), **2a** (x mmol), TMSN<sub>3</sub> (0.2 mmol), <sup>n</sup>Bu<sub>4</sub>NBF<sub>4</sub> (0.1 M), TFA (0.4 mmol) and DMSO (4 mL) in an undivided cell under a constant current of 5 mA in air at rt for 8 h. <sup>[b]</sup>Isolated yield.

### 3.9 Additional screening of anode materials<sup>[a]</sup>

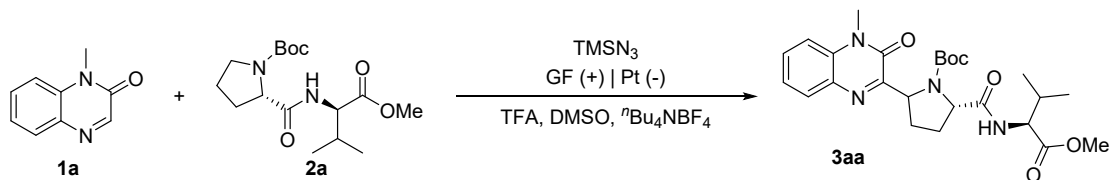

| Entry | electrode materials   | Yield (%) <sup>[b]</sup> |
|-------|-----------------------|--------------------------|
| 1     | C plate(+) Pt(-)      | 32                       |
| 2     | Carbon paper(+) Pt(-) | 41                       |

<sup>[a]</sup>Reaction conditions: **1a** (0.1 mmol), **2a** (0.3 mmol), TMSN<sub>3</sub> (0.2 mmol), <sup>n</sup>Bu<sub>4</sub>NBF<sub>4</sub> (0.1 M), TFA (0.4 mmol) and DMSO (4 mL) in an undivided cell under a constant current of 5 mA in air at rt for 8 h. <sup>[b]</sup>Isolated yield.

## 4. Mechanistic investigations

### 4.1 Cyclic voltammetry studies

Cyclic voltammetry (CV) experiments were performed to detect the redox potential of substrates involving the process. As shown in figure, a reduction peak of TMSN<sub>3</sub> can be observed at -2.15 V vs Ag/AgCl (blue curve), which reveals that TMSN<sub>3</sub> may be reduced at cathode. By using <sup>n</sup>Bu<sub>4</sub>NN<sub>3</sub> as the azide anion source, an oxidation peak at 1.12 V vs Ag/AgCl can be found, which indicates that the azide anion is more readily oxidized than **1a** (red curve), TMSN<sub>3</sub> (green curve) and **2a** (blue curve) in this electrochemical reaction process.

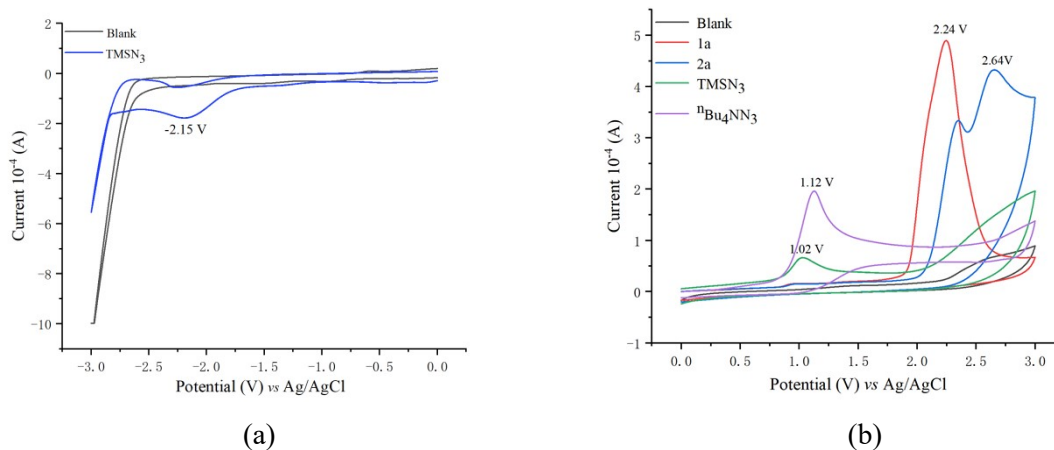

CV scans (scan rate 100 mv·s<sup>-1</sup>) of substrates: (a) Blank (<sup>n</sup>Bu<sub>4</sub>NBF<sub>4</sub> (0.1 M) in CH<sub>3</sub>CN); TMSN<sub>3</sub> (0.01 M, blue curve). (b) Blank (<sup>n</sup>Bu<sub>4</sub>NBF<sub>4</sub> (0.1 M) in CH<sub>3</sub>CN); TMSN<sub>3</sub> (0.01 M, green curve); **1a** (0.01 M red curve); **2a** (0.01 M, blue curve); <sup>n</sup>Bu<sub>4</sub>NN<sub>3</sub> (0.01 M, purple curve). The CV is plotted by using the Origin conversion.

### 4.2 Radical capture experiment

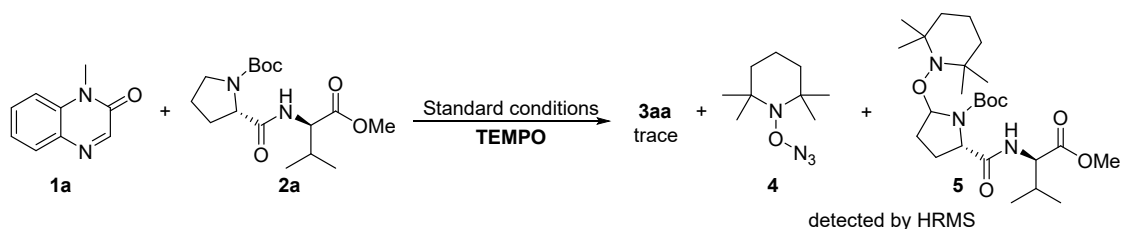

To an undivided cell (10 mL) were added quinoxalin-2(1*H*)-one (**1a**, 0.1 mmol, 1.0 equiv.), (*L*)-Boc-Pro-Val-OMe (**2a**, 0.3 mmol, 3.0 equiv.), TMSN<sub>3</sub> (23 mg, 26 μL, 0.2 mmol, 2.0 equiv.), <sup>n</sup>Bu<sub>4</sub>NBF<sub>4</sub> (130 mg, 0.4 mmol, 0.1 M), TEMPO (78.1 mg, 0.5 mmol, 5.0 equiv.), and DMSO (4 mL). The flask was equipped with graphite felt as anode and

platinum plate electrode (10 mm×15 mm) as cathode. The reaction mixture was stirred and electrolyzed at a constant current (5 mA) under air at room temperature for 8 h. The reaction was significantly inhibited in the presence of TEMPO, yielding only trace amounts of **3aa**.

HRMS  $[M+K]^+$  calcd for  $C_9H_{18}N_4O$ , 237.1112; found 237.1107.

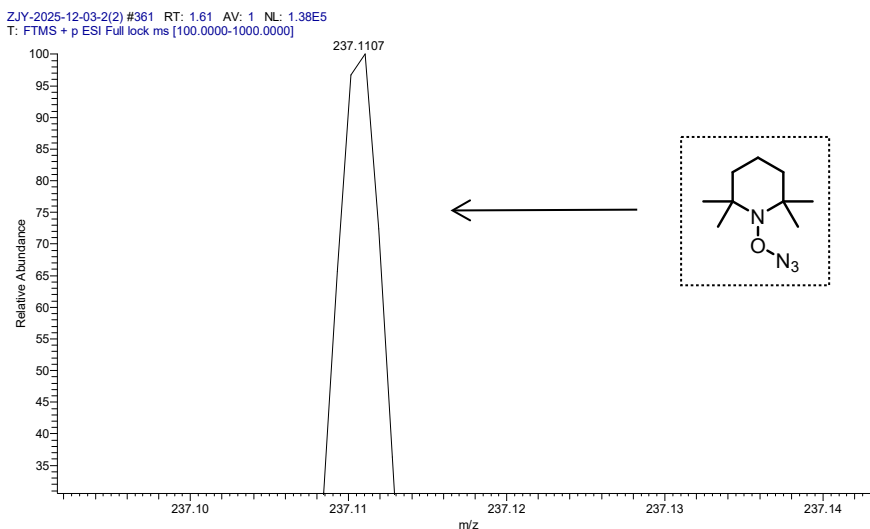

HRMS  $[M+K]^+$  calcd for  $C_{25}H_{45}N_3O_6$ , 522.2939; found 522.2752.

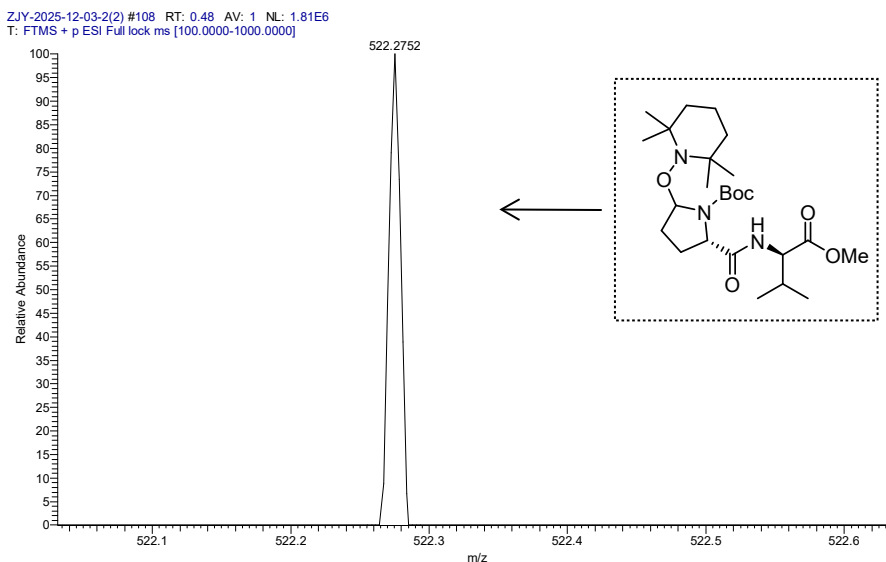

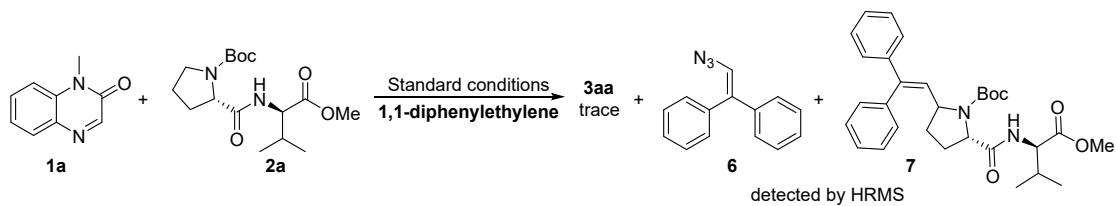

To an undivided cell (10 mL) were added quinoxalin-2(1H)-one (**1a**, 0.1 mmol, 1.0 equiv.), (L)-Boc-Pro-Val-OMe (**2a**, 0.3 mmol, 3.0 equiv.), TMSN<sub>3</sub> (23 mg, 26 μL, 0.2 mmol, 2.0 equiv.), <sup>n</sup>Bu<sub>4</sub>NBF<sub>4</sub> (130 mg, 0.4 mmol, 0.1 M), 1,1-diphenylethylene (90.1 mg, 0.5 mmol, 5.0 equiv.), and DMSO (4 mL). The flask was equipped with graphite felt as anode and platinum plate electrode (10 mm×15 mm) as cathode. The reaction mixture was stirred and electrolyzed at a constant current (5 mA) under air at room temperature for 8 h. The reaction was significantly inhibited in the presence of 1,1-diphenylethylene, yielding only trace amounts of **3aa**.

HRMS [M+K]<sup>+</sup> calcd for C<sub>14</sub>H<sub>11</sub>N<sub>3</sub>, 260.0590; found 260.0586.

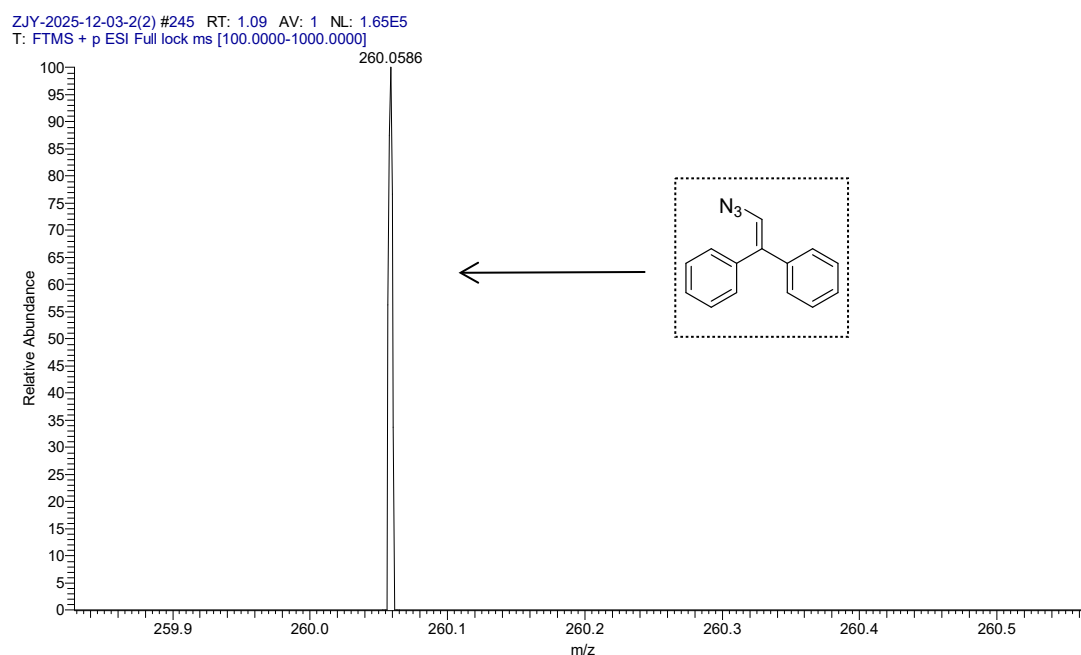

HRMS  $[M+K]^+$  calcd for  $C_{30}H_{38}N_2O_5$ , 545.2412; found 545.2421.

ZJY-2025-12-03-2(2) #24 RT: 0.20 AV: 1 NL: 6.35E3  
T: FTMS - c ESI Full ms [120.0000-800.0000]

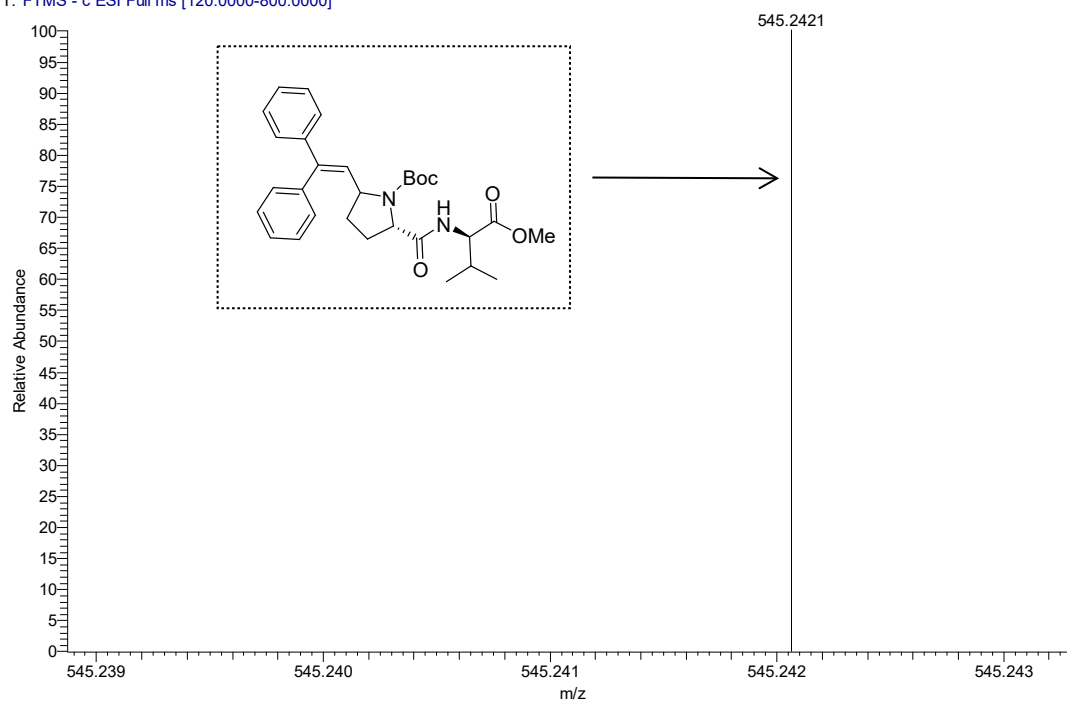

## 5. Characterization of products

### *tert*-butyl (2*S*)-2-(((*R*)-1-methoxy-3-methyl-1-oxobutan-2-yl)carbamoyl)-5-(4-methyl-3-oxo-3,4-dihydroquinoxalin-2-yl)pyrrolidine-1-carboxylate

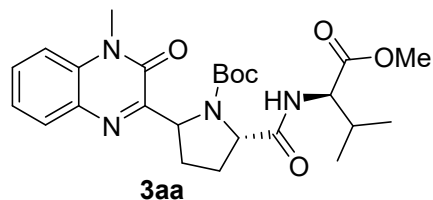

yellow oily liquid; 41.3 mg, 85% yield,  $^1\text{H NMR}$  (600 MHz, Chloroform-*d*)  $\delta$  7.75 (m, 1H), 7.58-7.48 (m, 1H), 7.35-7.27 (m, 2H), 5.56 (m, 1H), 4.76-4.52 (m, 2H), 3.76-3.64 (m, 6H), 2.50-2.37

(m, 1H), 2.34-2.16 (m, 2H), 2.01 (s, 1H), 1.96 (m, 1H), 1.42 (s, 4H), 1.16 (s, 5H), 0.98 (dd,  $J = 11.4, 7.2$  Hz, 3H), 0.90 (dd,  $J = 10.2, 6.6$  Hz, 3H).  $^{13}\text{C NMR}$  (151 MHz,  $\text{CDCl}_3$ )  $\delta$  172.36, 172.17, 158.67, 155.51, 153.86, 133.18, 132.17, 130.29, 130.27, 123.97, 113.74, 80.24, 61.22, 59.48, 57.17, 52.11, 31.23, 29.81, 28.98, 28.42, 28.12, 19.11. **HRMS (ESI)  $m/z$ :**  $[\text{M}+\text{H}]^+$  calculated value:  $\text{C}_{25}\text{H}_{34}\text{N}_4\text{O}_6^+$  487.2557, measured value: 487.2551.

### *tert*-butyl (2*S*)-2-((2-ethoxy-2-oxoethyl)carbamoyl)-5-(4-methyl-3-oxo-3,4-dihydroquinoxalin-2-yl)pyrrolidine-1-carboxylate

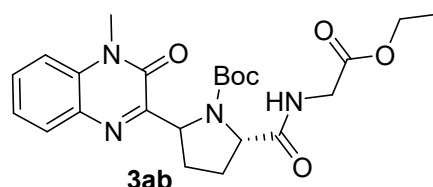

yellow oily liquid; 34.4 mg, 75% yield,  $^1\text{H NMR}$  (600 MHz, Chloroform-*d*)  $\delta$  7.78 (m, 1H), 7.58-7.50 (m, 1H), 7.37-7.28 (m, 2H), 5.55 (m, 1H), 4.77-4.63 (m, 1H), 4.26-4.18 (m, 2H), 4.16-4.00

(m, 2H), 3.69 (d,  $J = 27.6$  Hz, 3H), 2.56-2.39 (m, 1H), 2.35-2.24 (m, 1H), 2.18-2.06 (m, 1H), 2.02-1.92 (m, 1H), 1.43 (s, 4H), 1.29 (q,  $J = 7.2$  Hz, 3H), 1.17 (s, 5H).  $^{13}\text{C NMR}$  (151 MHz,  $\text{CDCl}_3$ )  $\delta$  172.61, 169.91, 158.93, 155.60, 153.91, 133.21, 132.23, 130.36, 130.29, 130.21, 113.76, 80.38, 61.46, 61.20, 59.49, 41.64, 29.99, 28.61, 28.25, 26.08, 14.29. **HRMS (ESI)  $m/z$ :**  $[\text{M}+\text{H}]^+$  calculated value:  $\text{C}_{23}\text{H}_{31}\text{N}_4\text{O}_6^+$  459.2244 measured, value: 459.2235.

**tert-butyl (2S)-2-(((S)-1-ethoxy-1-oxo-3-phenylpropan-2-yl)carbamoyl)-5-(4-methyl-3-oxo-3,4-dihydroquinoxalin-2-yl)pyrrolidine-1-carboxylate**

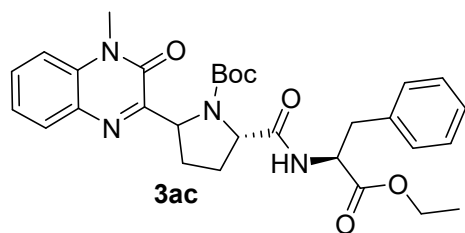

yellow oily liquid; 49.3 mg, 90% yield,  $^1\text{H NMR}$  (600 MHz, Chloroform-*d*)  $\delta$  7.75 (m, 1H), 7.58-7.48 (m, 1H), 7.36-7.28 (m, 4H), 7.30-7.19 (m, 1H), 7.19-7.15 (m, 2H), 5.47 (m, 1H), 4.96-4.81

(m, 1H), 4.64 (m, 1H), 4.20-4.09 (m, 2H), 3.67 (d,  $J = 28.2$  Hz, 3H), 3.23-3.03 (m, 2H), 2.50-2.33 (m, 1H), 2.18-2.07 (m, 1H), 2.04-1.86 (m, 2H), 1.37 (s, 4H), 1.20 (q,  $J = 7.2$  Hz, 3H), 1.15 (s, 5H).  $^{13}\text{C NMR}$  (151 MHz,  $\text{CDCl}_3$ )  $\delta$  172.04, 171.37, 158.82, 155.35, 153.83, 136.18, 133.15, 132.14, 130.28, 129.48, 128.59, 127.30, 127.06, 123.97, 113.73, 80.19, 62.14, 61.29, 59.34, 53.35, 38.07, 29.79, 28.97, 28.36, 28.19, 14.19. **HRMS (ESI) m/z:**  $[\text{M}+\text{H}]^+$  calculated value:  $\text{C}_{30}\text{H}_{36}\text{N}_4\text{O}_6^+$  549.2713, measured value: 549.2705.

**di-tert-butyl ((2R)-1-(tert-butoxycarbonyl)-5-(4-methyl-3-oxo-3,4-dihydroquinoxalin-2-yl)pyrrolidine-2-carbonyl)-L-glutamate**

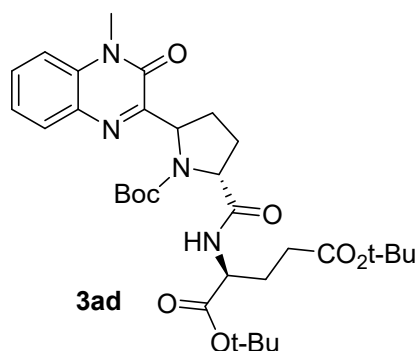

yellow oily liquid; 40 mg, 65% yield,  $^1\text{H NMR}$  (600 MHz, Chloroform-*d*)  $\delta$  7.74 (m, 1H), 7.57-7.47 (m, 1H), 7.35-7.25 (m, 2H), 5.55 (m, 1H), 4.64 (m, 1H), 4.58-4.45 (m, 1H), 3.67 (d,  $J = 27.6$  Hz, 3H), 2.50-2.22 (m, 4H), 2.22-2.09 (m, 2H), 2.00-1.80 (m, 2H), 1.48-1.42 (m, 9H), 1.44-1.37 (m, 15H), 1.15 (s,

3H).  $^{13}\text{C NMR}$  (151 MHz,  $\text{CDCl}_3$ )  $\delta$  172.92, 171.96, 170.75, 157.60, 154.76, 153.95, 133.52, 132.31, 130.28, 130.07, 123.64, 113.71, 82.42, 80.89, 80.18, 62.24, 60.03, 51.74, 31.56, 31.25, 29.80, 28.88, 28.43, 28.14, 28.07, 27.70. **HRMS (ESI) m/z:**  $[\text{M}+\text{H}]^+$  calculated value:  $\text{C}_{32}\text{H}_{46}\text{N}_4\text{O}_8^+$  615.3394, measured value: 615.3389.

**tert-butyl (2R)-2-(((S)-3-hydroxy-1-methoxy-1-oxopropan-2-yl)carbamoyl)-5-(4-methyl-3-oxo-3,4-dihydroquinoxalin-2-yl)pyrrolidine-1-carboxylate**

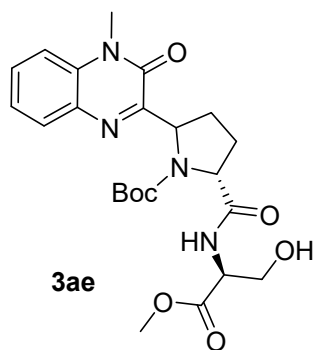

yellow oily liquid; 35.1 mg, 74% yield,  $^1\text{H NMR}$  (600 MHz, Chloroform-*d*)  $\delta$  7.75 (m, 1H), 7.58-7.49 (m, 1H), 7.36-7.27 (m, 2H), 5.64-5.51 (m, 1H), 4.77-4.62 (m, 2H), 4.06 (m, 1H), 3.92-3.85 (m, 1H), 3.78 (d,  $J = 2.4$  Hz, 3H), 3.68 (d,  $J = 31.2$  Hz, 3H), 2.53-2.42 (m, 1H), 2.34-2.13 (m, 2H), 2.03-1.96 (m, 1H), 1.42 (s, 3H), 1.17 (s, 6H).  $^{13}\text{C NMR}$  (151 MHz,  $\text{CDCl}_3$ )  $\delta$  172.38, 170.91, 158.27, 155.91, 153.81, 133.20, 132.15, 130.42, 130.29, 124.05, 113.79, 80.97, 62.64, 61.78, 59.76, 55.07, 52.75, 29.64, 29.02, 28.13, 26.72. **HRMS (ESI) m/z:**  $[\text{M}+\text{H}]^+$  calculated value:  $\text{C}_{23}\text{H}_{30}\text{N}_4\text{O}_7^+$  475.2193, measured value: 475.2186.

***tert*-butyl (2R)-2-(((S)-1-methoxy-4-methyl-1-oxopentan-2-yl)carbamoyl)-5-(4-methyl-3-oxo-3,4-dihydroquinoxalin-2-yl)pyrrolidine-1-carboxylate**

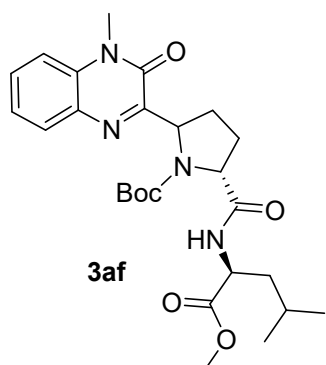

yellow oily liquid; 36.7 mg, 73% yield,  $^1\text{H NMR}$  (600 MHz, Chloroform-*d*)  $\delta$  7.82-7.66 (m, 1H), 7.58-7.49 (m, 1H), 7.40-7.27 (m, 2H), 5.56 (m, 1H), 4.75-4.68 (m, 1H), 4.67-4.60 (m, 1H), 3.74-3.65 (m, 6H), 2.53-2.41 (m, 1H), 2.34-2.19 (m, 1H), 2.14-2.03 (m, 1H), 1.97 (m, 1H), 1.75-1.63 (m, 2H), 1.62-1.55 (m, 1H), 1.41 (s, 6H), 1.16 (s, 3H), 0.99-0.92 (m, 6H).  $^{13}\text{C NMR}$  (151 MHz,  $\text{CDCl}_3$ )  $\delta$  173.10, 172.11, 158.72, 154.96, 154.01, 133.56, 133.19, 132.20, 130.32, 123.73, 113.76, 80.94, 62.28, 60.12, 52.45, 50.39, 41.50, 29.87, 29.01, 28.37, 28.13, 24.84, 23.02. **HRMS (ESI) m/z:**  $[\text{M}+\text{H}]^+$  calculated value:  $\text{C}_{26}\text{H}_{36}\text{N}_4\text{O}_6^+$  501.2713, measured value: 501.2705.

**tert-butyl (2R)-2-(((2S)-3-hydroxy-1-methoxy-1-oxobutan-2-yl)carbamoyl)-5-(4-methyl-3-oxo-3,4-dihydroquinoxalin-2-yl)pyrrolidine-1-carboxylate**

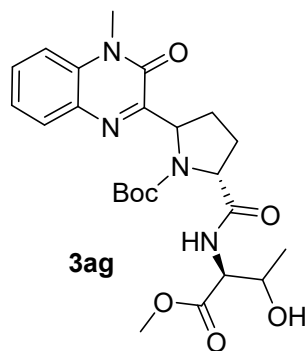

yellow oily liquid; 32.2 mg, 66% yield,  $^1\text{H NMR}$  (600 MHz, Chloroform-*d*)  $\delta$  7.74 (m, 1H), 7.59-7.47 (m, 1H), 7.35-7.28 (m, 2H), 5.57 (m, 1H), 4.70 (m, 1H), 4.61 (m, 1H), 4.45-4.25 (m, 1H), 3.79-3.63 (m, 7H), 2.56-2.43 (m, 1H), 2.21-2.12 (m, 1H), 2.06 (dd,  $J = 13.2, 7.2$  Hz, 1H), 2.00-1.93 (m, 1H), 1.41 (s, 4H), 1.24 (dd,  $J = 6.6, 2.4$  Hz, 3H), 1.16 (s, 5H).  $^{13}\text{C NMR}$  (151 MHz,  $\text{CDCl}_3$ )  $\delta$  172.79, 171.41, 158.46, 155.37, 153.84, 133.16, 132.16, 130.34, 130.28, 124.01, 113.76, 80.48, 68.45, 61.52, 59.59, 57.43, 52.57, 29.62, 29.00, 28.11, 26.73, 20.05. **HRMS (ESI)  $m/z$ :**  $[\text{M}+\text{H}]^+$  calculated value:  $\text{C}_{24}\text{H}_{32}\text{N}_4\text{O}_7$  489.2349, measured value: 489.2342.

**tert-butyl (2S)-2-(((R)-1-methoxy-1-oxopropan-2-yl)carbamoyl)-5-(4-methyl-3-oxo-3,4-dihydroquinoxalin-2-yl)pyrrolidine-1-carboxylate**

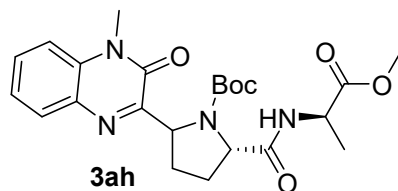

yellow oily liquid; 32.1 mg, 70% yield,  $^1\text{H NMR}$  (600 MHz, Chloroform-*d*)  $\delta$  7.78 (m, 1H), 7.59-7.51 (m, 1H), 7.43-7.28 (m, 2H), 5.56 (m, 1H), 4.75-4.59 (m, 2H), 3.80-3.64 (m, 6H), 2.55-2.40 (m, 1H), 2.29 (m, 1H), 2.15-2.03 (m, 1H), 1.98 (m, 1H), 1.47-1.38 (m, 9H), 1.29-1.23 (m, 3H).  $^{13}\text{C NMR}$  (151 MHz,  $\text{CDCl}_3$ )  $\delta$  173.22, 172.76, 155.63, 154.75, 154.05, 133.61, 133.23, 132.44, 130.23, 123.75, 113.77, 80.88, 62.17, 61.23, 60.06, 52.66, 47.86, 30.00, 28.47, 25.87, 18.70. **HRMS (ESI)  $m/z$ :**  $[\text{M}+\text{H}]^+$  calculated value:  $\text{C}_{23}\text{H}_{30}\text{N}_4\text{O}_6^+$  459.2244, measured value: 459.2237.

***tert*-butyl (2*S*)-2-(((*R*)-4-amino-1-(*tert*-butoxy)-1,4-dioxobutan-2-yl)carbamoyl)-5-(4-methyl-3-oxo-3,4-dihydroquinoxalin-2-yl)pyrrolidine-1-carboxylate**

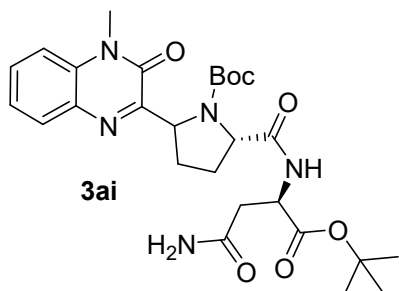

yellow oily liquid; 35.8 mg, 66% yield,  $^1\text{H NMR}$  (600 MHz, Chloroform-*d*)  $\delta$  7.75 (m, 1H), 7.58-7.45 (m, 1H), 7.36-7.26 (m, 2H), 5.56 (m, 1H), 4.77-4.68 (m, 1H), 4.68-4.58 (m, 1H), 3.68 (d,  $J = 29.4$  Hz, 3H), 2.94-2.67 (m, 2H), 2.56-2.45 (m, 1H), 2.34-2.15 (m, 1H), 2.13-2.01 (m, 1H), 2.00-1.92 (m, 1H), 1.46 (s, 8H), 1.38 (s, 5H), 1.14 (s, 5H).  $^{13}\text{C NMR}$  (151 MHz,  $\text{CDCl}_3$ )  $\delta$  173.12, 172.33, 169.88, 158.59, 155.10, 153.83, 133.18, 132.17, 130.31, 130.14, 123.98, 113.74, 82.38, 80.28, 61.61, 59.54, 49.70, 37.72, 29.62, 28.99, 28.36, 28.13, 28.01. **HRMS (ESI)  $m/z$ :**  $[\text{M}+\text{H}]^+$  calculated value:  $\text{C}_{27}\text{H}_{37}\text{N}_5\text{O}_7^+$  544.2771, measured value: 544.2762.

***tert*-butyl (2*R*)-2-(((*R*)-3-mercapto-1-methoxy-1-oxopropan-2-yl)carbamoyl)-5-(4-methyl-3-oxo-3,4-dihydroquinoxalin-2-yl)pyrrolidine-1-carboxylate**

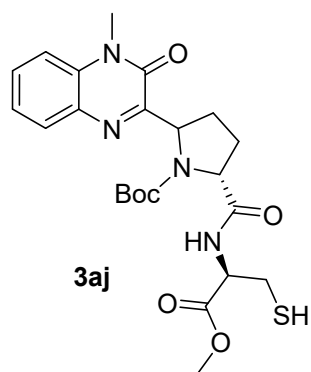

yellow oily liquid; 20.6 mg, 42% yield,  $^1\text{H NMR}$  (600 MHz, Chloroform-*d*)  $\delta$  7.86-7.79 (m, 1H), 7.60-7.51 (m, 1H), 7.38-7.28 (m, 2H), 5.57 (m, 1H), 4.93-4.78 (m, 1H), 4.77-4.72 (m, 1H), 3.79-3.75 (m, 3H), 3.72 (d,  $J = 3.6$  Hz, 3H), 3.67 (d,  $J = 14.4$  Hz, 2H), 2.54-2.42 (m, 1H), 2.27-2.18 (m, 2H), 2.06-1.94 (m, 2H), 1.44 (s, 4H), 1.18 (s, 5H).  $^{13}\text{C NMR}$  (101 MHz, CHLOROFORM-*D*)  $\delta$  172.21, 170.38, 154.02, 153.90, 147.18, 133.55, 131.74, 130.15, 124.56, 123.98, 113.75, 80.73, 61.06, 59.35, 52.68, 47.08, 31.52, 30.28, 29.78, 28.46, 28.18. **HRMS (ESI)  $m/z$ :**  $[\text{M}+\text{H}]^+$  calculated value:  $\text{C}_{23}\text{H}_{30}\text{N}_4\text{O}_6\text{S}^+$  491.1964, measured value: 491.1954.

**tert-butyl (2R)-2-(((R)-1-methoxy-4-(methylthio)-1-oxobutan-2-yl)carbamoyl)-5-(4-methyl-3-oxo-3,4-dihydroquinoxalin-2-yl)pyrrolidine-1-carboxylate**

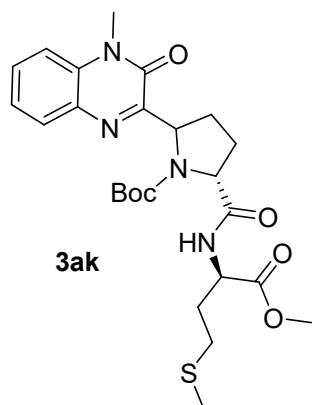

yellow oily liquid; 20.7 mg, 40% yield,  $^1\text{H NMR}$  (400 MHz, Chloroform-*d*)  $\delta$  7.88-7.70 (m, 1H), 7.61-7.45 (m, 1H), 7.37-7.27 (m, 2H), 5.66-5.48 (m, 1H), 4.93-4.19 (m, 2H), 3.81-3.63 (m, 6H), 2.86-2.39 (m, 2H), 2.36-2.15 (m, 2H), 2.13-1.80 (m, 5H), 1.45 (d,  $J = 8.8$  Hz, 4H), 1.27-1.24 (m, 2H), 1.18 (s, 3H).  $^{13}\text{C NMR}$  (151 MHz,  $\text{CDCl}_3$ )  $\delta$  173.19, 171.29, 158.72, 155.66, 153.94, 130.36, 130.23, 124.51, 124.04, 123.75, 113.78, 80.40, 60.52, 59.56, 52.55, 51.59, 29.89, 29.44, 29.03, 28.53, 26.05, 21.18, 14.32. **HRMS (ESI) m/z:**  $[\text{M}+\text{H}]^+$  calculated value:  $\text{C}_{25}\text{H}_{34}\text{N}_4\text{O}_6\text{S}$  519.2287, measured value: 519.2295.

**tert-butyl (2S)-2-(((S)-1-methoxy-1-oxo-3-(1-pivaloyl-1H-indol-3-yl)propan-2-yl)carbamoyl)-5-(4-methyl-3-oxo-3,4-dihydroquinoxalin-2-yl)pyrrolidine-1-carboxylate**

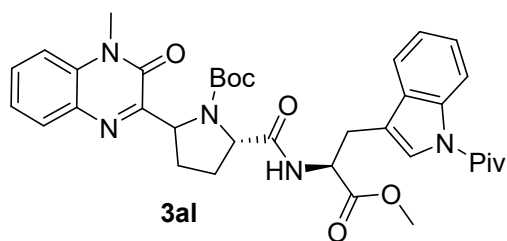

yellow oily liquid; 47.3 mg, 72% yield,  $^1\text{H NMR}$  (600 MHz, Chloroform-*d*)  $\delta$  8.51-8.44 (m, 1H), 7.82-7.61 (m, 2H), 7.60-7.46 (m, 2H), 7.41-7.26 (m, 4H), 5.39 (m, 1H), 5.15-4.96 (m, 1H), 4.70-4.53 (m, 1H), 3.71 (d,  $J = 14.4$  Hz, 3H), 3.66 (d,  $J = 19.2$  Hz, 3H), 3.36-3.20 (m, 2H), 2.26-2.14 (m, 1H), 2.12-2.03 (m, 1H), 1.93-1.82 (m, 1H), 1.79 (s, 1H), 1.54-1.48 (m, 10H), 1.36 (s, 4H), 1.04 (s, 4H).  $^{13}\text{C NMR}$  (151 MHz,  $\text{CDCl}_3$ )  $\delta$  177.11, 172.24, 172.07, 158.84, 155.36, 153.86, 137.08, 133.20, 132.21, 130.28, 129.77, 125.53, 123.97, 123.91, 123.81, 123.57, 118.41, 117.55, 116.24, 113.76, 80.17, 61.21, 59.50, 52.53, 52.18, 41.33, 29.94, 28.99, 28.74, 28.21, 28.00, 27.70. **HRMS (ESI) m/z:**  $[\text{M}+\text{H}]^+$  calculated value:  $\text{C}_{36}\text{H}_{43}\text{N}_5\text{O}_7$  658.3241, measured value: 658.3256.

***tert*-butyl (2S)-2-(((2S)-1-methoxy-3-methyl-1-oxopentan-2-yl)carbamoyl)-5-(4-methyl-3-oxo-3,4-dihydroquinoxalin-2-yl)pyrrolidine-1-carboxylate**

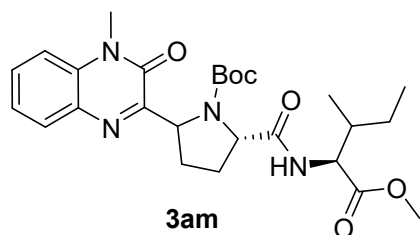

yellow oily liquid; 35.5 mg, 71% yield, <sup>1</sup>H NMR (600 MHz, Chloroform-*d*) δ 7.74 (m, 1H), 7.56-7.49 (m, 1H), 7.36-7.27 (m, 2H), 5.56 (m, 1H), 4.73-4.56 (m, 2H), 3.74-3.65 (m, 6H), 2.50-2.36 (m, 1H),

2.32-2.20 (m, 1H), 2.14-2.00 (m, 1H), 1.99-1.90 (m, 2H), 1.52-1.36 (m, 6H), 1.16 (s, 5H), 0.97-0.88 (m, 6H). <sup>13</sup>C NMR (151 MHz, CDCl<sub>3</sub>) δ 172.32, 172.01, 158.66, 155.49, 153.85, 133.17, 132.16, 130.27, 130.07, 123.96, 113.74, 80.22, 61.21, 59.46, 56.59, 52.05, 37.86, 29.82, 28.97, 28.39, 28.10, 24.99, 15.64, 11.66. HRMS (ESI) *m/z*: [M+H]<sup>+</sup> calculated value: C<sub>26</sub>H<sub>36</sub>N<sub>4</sub>O<sub>6</sub> 501.2713, measured value:501.2721.

**dimethyl ((2R)-1-(*tert*-butoxycarbonyl)-5-(4-methyl-3-oxo-3,4-dihydroquinoxalin-2-yl)pyrrolidine-2-carbonyl)-L-aspartate**

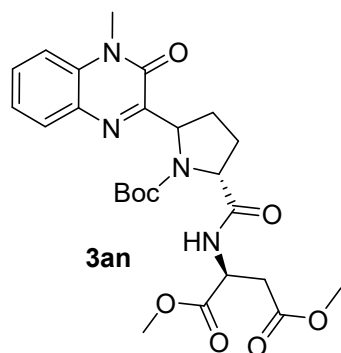

yellow oily liquid; 32.1 mg, 62% yield, <sup>1</sup>H NMR (600 MHz, Chloroform-*d*) δ 7.83-7.71 (m, 1H), 7.60-7.51 (m, 1H), 7.37-7.26 (m, 2H), 5.60-5.45 (m, 1H), 4.95-4.85 (m, 1H), 4.72-4.58 (m, 1H), 3.78-3.75 (m, 3H), 3.72-3.65 (m, 6H), 3.07-2.84 (m, 2H), 2.50-2.18 (m, 2H), 2.16-1.92 (m, 2H), 1.43 (s, 4H), 1.17 (s, 5H). <sup>13</sup>C NMR (151 MHz,

CDCl<sub>3</sub>) δ 173.05, 172.29, 171.28, 158.89, 155.26, 153.92, 133.21, 130.35, 130.28, 130.20, 124.00, 113.75, 80.20, 61.17, 59.42, 52.85, 52.09, 48.77, 36.37, 29.95, 29.01, 28.55, 28.20. HRMS (ESI) *m/z*: [M+H]<sup>+</sup> calculated value: C<sub>25</sub>H<sub>32</sub>N<sub>4</sub>O<sub>8</sub> 517.2328, measured value: 517.2320.

***tert*-butyl (2R)-2-(((S)-7-(*tert*-butoxycarbonyl)-6-imino-2,2-dimethyl-4,12-dioxo-3,13-dioxo-5,7-diazapentadecan-11-yl)carbamoyl)-5-(4-methyl-3-oxo-3,4-dihydroquinoxalin-2-yl)pyrrolidine-1-carboxylate**

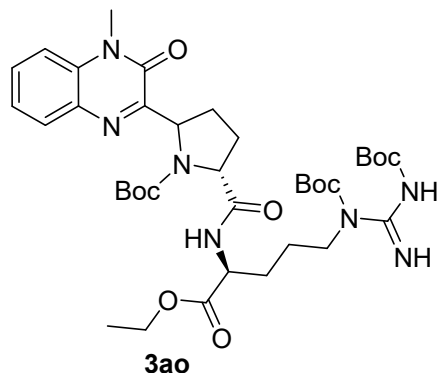

yellow oily liquid; 37.7 mg, 50% yield,  $^1\text{H}$  NMR (600 MHz, Chloroform-*d*)  $\delta$  8.37-8.25 (m, 1H), 7.79-7.64 (m, 1H), 7.55-7.46 (m, 1H), 7.40-7.28 (m, 2H), 5.62-5.41 (m, 1H), 4.72-4.49 (m, 2H), 4.31-4.04 (m, 3H), 3.71-3.58 (m, 3H), 3.45-3.34 (m, 2H), 2.46-2.38 (m, 1H), 2.30-1.98 (m, 3H), 1.93-1.63 (m, 4H), 1.47-1.39 (m, 22H), 1.29-1.20

(m, 5H), 1.14-1.11 (m, 3H).  $^{13}\text{C}$  NMR (151 MHz,  $\text{CDCl}_3$ )  $\delta$  172.93, 171.96, 163.58, 158.66, 156.20, 155.47, 153.79, 153.21, 133.12, 132.11, 130.22, 130.03, 123.90, 113.69, 80.82, 80.22, 79.18, 61.66, 61.11, 59.43, 51.92, 40.44, 29.83, 29.63, 28.91, 28.64, 28.41, 28.32, 28.08, 24.84, 14.20. **HRMS (ESI)  $m/z$ :**  $[\text{M}+\text{H}]^+$  calculated value:  $\text{C}_{37}\text{H}_{55}\text{N}_7\text{O}_{10}$  758.4129, measured value: 758.4121.

***tert*-butyl (2R)-2-(((S)-1-methoxy-1-oxo-3-(1-trityl-1H-imidazol-4-yl)propan-2-yl)carbamoyl)-5-(4-methyl-3-oxo-3,4-dihydroquinoxalin-2-yl)pyrrolidine-1-carboxylate**

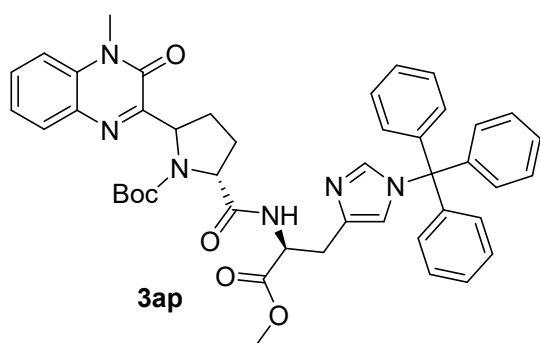

yellow oily liquid; 53.6 mg, 70% yield,  $^1\text{H}$  NMR (600 MHz, Chloroform-*d*)  $\delta$  7.78 (m, 1H), 7.57-7.47 (m, 1H), 7.41 (m, 1H), 7.34-7.30 (m, 11H), 7.14-7.09 (m, 6H), 6.55 (dd,  $J = 8.4, 1.8$  Hz, 1H), 5.57 (m, 1H), 4.87-4.79 (m, 1H), 4.64 (m, 1H), 3.67 (d,  $J = 33$  Hz,

3H), 3.59 (d,  $J = 4.2$  Hz, 3H), 3.16-2.85 (m, 2H), 2.56-2.46 (m, 1H), 2.17-2.08 (m, 1H), 2.07-2.02 (m, 1H), 1.94-1.86 (m, 1H), 1.37 (s, 5H), 1.10 (s, 4H).  $^{13}\text{C}$  NMR (151 MHz,  $\text{CDCl}_3$ )  $\delta$  173.42, 171.73, 158.25, 154.22, 154.00, 142.43, 138.92, 136.49, 133.49, 132.48, 129.87, 129.81, 128.15, 128.12, 128.06, 123.53, 119.27, 113.58, 80.13, 75.31,

62.15, 59.66, 52.39, 52.10, 29.98, 29.75, 28.82, 28.45, 28.19. **HRMS (ESI) m/z:** [M+H]<sup>+</sup> calculated value: C<sub>45</sub>H<sub>46</sub>N<sub>6</sub>O<sub>6</sub> 767.3557, measured value: 767.3574.

***tert*-butyl (2R)-2-(((S)-1-methoxy-1-oxo-3-(4-((propoxycarbonyl)oxy)phenyl)prop an-2-yl)carbamoyl)-5-(4-methyl-3-oxo-3,4-dihydroquinoxalin-2-yl)pyrrolidine-1-carboxylate**

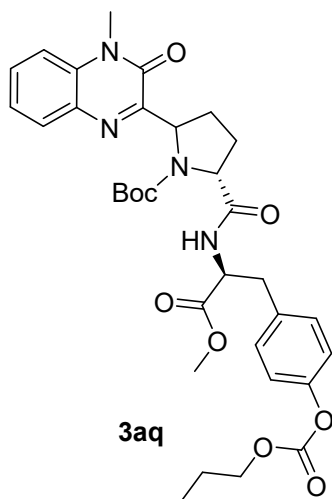

yellow oily liquid; 44.3 mg, 70% yield, <sup>1</sup>H NMR (600 MHz, Chloroform-*d*) δ 7.77-7.66 (m, 1H), 7.56-7.45 (m, 1H), 7.33 (m, 2H), 7.19-7.04 (m, 4H), 5.47 (m, 1H), 4.94-4.79 (m, 1H), 4.71-4.52 (m, 1H), 4.21-4.06 (m, 2H), 3.76-3.54 (m, 6H), 3.10 (q, *J* = 14.4, 6 Hz, 2H), 2.46-2.31 (m, 1H), 2.28-2.02 (m, 2H), 2.00-1.84 (m, 1H), 1.77-1.67 (m, 2H), 1.47-1.28 (m, 4H), 1.12 (m, 5H), 1.00-0.91 (m, 3H). <sup>13</sup>C NMR (151 MHz, CDCl<sub>3</sub>) δ 171.99, 171.61, 158.70, 155.42, 154.46, 153.74, 150.18, 133.91, 133.08, 132.05,

130.39, 130.20, 129.99, 123.87, 121.05, 113.69, 80.18, 70.28, 61.11, 59.32, 53.31, 52.25, 37.43, 29.77, 28.89, 28.08, 26.00, 21.96, 10.18. **HRMS (ESI) m/z:** [M+H]<sup>+</sup> calculated value: C<sub>33</sub>H<sub>40</sub>N<sub>4</sub>O<sub>9</sub> 637.2874, measured value: 637.2887.

***tert*-butyl (2R)-2-(((S)-6-(((benzyloxy)carbonyl)amino)-1-methoxy-1-oxohexan-2-yl)carbamoyl)-5-(4-methyl-3-oxo-3,4-dihydroquinoxalin-2-yl)pyrrolidine-1-carboxylate**

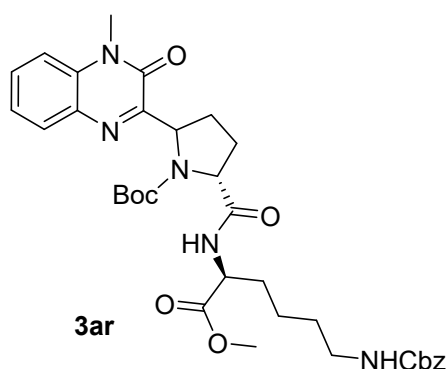

yellow oily liquid; 48.7 mg, 75% yield, <sup>1</sup>H NMR (600 MHz, Chloroform-*d*) δ 7.82-7.68 (m, 1H), 7.58-7.48 (m, 1H), 7.40-7.28 (m, 3H), 7.21-7.16 (m, 2H), 7.13-7.07 (m, 2H), 5.58-5.40 (m, 1H), 4.97-4.54 (m, 2H), 4.23-4.14 (m, 2H), 3.73-3.62 (m, 6H), 3.19-3.05 (m, 2H), 2.46-2.36 (m, 1H), 2.20-2.01 (m, 1H), 2.01-1.87 (m, 2H), 1.81-1.68 (m, 2H), 1.50-1.41 (m, 1H), 1.41-1.31 (m, 4H), 1.27-1.19 (m, 1H), 1.18-1.12 (m, 5H),

1.03-0.95 (m, 2H).  $^{13}\text{C}$  NMR (151 MHz,  $\text{CDCl}_3$ )  $\delta$  172.59, 171.98, 158.44, 156.50, 155.33, 153.70, 136.78, 133.03, 132.00, 130.20, 130.11, 129.93, 128.41, 127.97, 123.85, 113.68, 80.21, 66.33, 61.15, 59.39, 52.26, 51.74, 40.56, 32.21, 31.82, 29.63, 28.86, 28.28, 27.95, 22.62. HRMS (ESI)  $m/z$ :  $[\text{M}+\text{H}]^+$  calculated value:  $\text{C}_{34}\text{H}_{44}\text{N}_5\text{O}_8$  650.3190, measured value: 650.3187.

***tert*-butyl (5*R*)-2-(4-benzyl-3-oxo-3,4-dihydroquinoxalin-2-yl)-5-(((*S*)-1-methoxy-3-methyl-1-oxobutan-2-yl)carbamoyl)pyrrolidine-1-carboxylate**

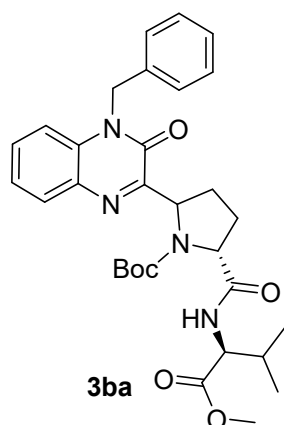

yellow oily liquid; 34.3 mg, 61% yield,  $^1\text{H}$  NMR (600 MHz, Chloroform-*d*)  $\delta$  7.76 (m, 1H), 7.44-7.35 (m, 1H), 7.30-7.26 (m, 3H), 7.25-7.18 (m, 4H), 5.70-5.61 (m, 1H), 5.59-5.52 (m, 1H), 5.36 (m, 1H), 4.72 (m, 1H), 4.59 (m, 1H), 3.73 (d,  $J$  = 12.6 Hz, 3H), 2.54-2.42 (m, 1H), 2.39-2.26 (m, 1H), 2.26-2.12 (m, 2H), 1.99 (dd,  $J$  = 13.2, 6.6 Hz, 1H), 1.44 (s, 4H), 1.18 (s, 5H), 0.99 (dd,  $J$  = 11.4, 7.2 Hz, 3H), 0.92 (dd,  $J$  = 10.2, 7.2 Hz, 3H).  $^{13}\text{C}$  NMR (151 MHz,  $\text{CDCl}_3$ )  $\delta$  172.31, 172.11, 158.86, 155.48, 153.94, 135.24, 132.84, 132.44, 130.37, 130.18, 129.00, 127.85, 126.89, 123.99, 114.50, 80.24, 61.25, 59.43, 57.18, 52.09, 45.61, 31.21, 29.91, 28.42, 28.12, 19.11. HRMS (ESI)  $m/z$ :  $[\text{M}+\text{H}]^+$  calculated value:  $\text{C}_{31}\text{H}_{38}\text{N}_4\text{O}_6$  563.2870, measured value: 563.2870.

***tert*-butyl (5*R*)-2-(4-allyl-3-oxo-3,4-dihydroquinoxalin-2-yl)-5-(((*S*)-1-methoxy-3-methyl-1-oxobutan-2-yl)carbamoyl)pyrrolidine-1-carboxylate**

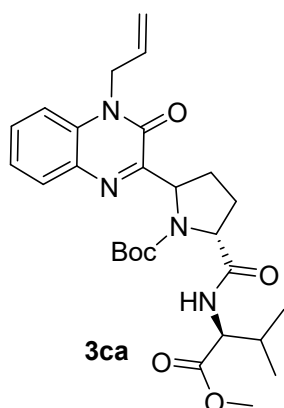

yellow oily liquid; 38.1 mg, 73% yield,  $^1\text{H}$  NMR (600 MHz, Chloroform-*d*)  $\delta$  7.77 (m, 1H), 7.54-7.47 (m, 1H), 7.35-7.27 (m, 2H), 5.98-5.88 (m, 1H), 5.58 (m, 1H), 5.29-5.10 (m, 2H), 5.03-4.79 (m, 2H), 4.77-4.65 (m, 1H), 4.60 (m, 1H), 3.74 (d,  $J$  = 12.6 Hz, 3H), 2.52-2.39 (m, 1H), 2.37-2.10 (m, 3H), 2.03-1.91 (m, 1H), 1.44 (s, 4H), 1.18 (s, 5H), 1.00 (dd,  $J$  = 10.2, 6.6 Hz, 3H), 0.92 (dd,

$J = 9.6, 7.2$  Hz, 3H).  $^{13}\text{C}$  NMR (151 MHz,  $\text{CDCl}_3$ )  $\delta$  172.42, 172.20, 158.91, 155.56, 153.47, 132.86, 132.43, 130.68, 130.45, 130.21, 123.99, 118.14, 114.34, 80.29, 61.29, 59.43, 57.24, 52.17, 44.32, 31.29, 29.93, 28.49, 28.19, 19.18. **HRMS (ESI) m/z:**  $[\text{M}+\text{H}]^+$  calculated value:  $\text{C}_{27}\text{H}_{36}\text{N}_4\text{O}_6$  513.2713, measured value: 513.2716.

***tert*-butyl (5R)-2-(4-(2-hydroxyethyl)-3-oxo-3,4-dihydroquinoxalin-2-yl)-5-(((S)-1-methoxy-3-methyl-1-oxobutan-2-yl)carbamoyl)pyrrolidine-1-carboxylate**

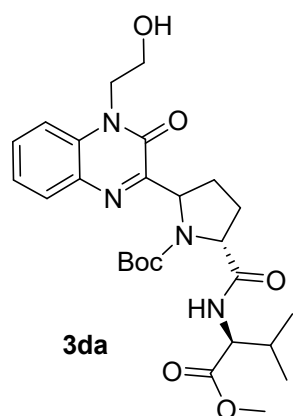

yellow oily liquid; 28.4 mg, 55% yield,  $^1\text{H}$  NMR (600 MHz, Chloroform-*d*)  $\delta$  7.76 (m, 1H), 7.57-7.42 (m, 2H), 7.36-7.27 (m, 1H), 5.55 (m, 1H), 4.69 (m, 1H), 4.58 (m, 1H), 4.52-4.34 (m, 2H), 3.99 (m, 2H), 3.73 (d,  $J = 13.8$  Hz, 3H), 2.51-2.38 (m, 1H), 2.36-2.09 (m, 3H), 2.01-1.90 (m, 1H), 1.42 (s, 4H), 1.24 (q,  $J = 7.8$  Hz, 1H), 1.16 (s, 4H), 0.98 (dd,  $J = 11.4, 6.6$  Hz, 3H), 0.91 (dd,  $J = 10.8, 6.6$  Hz, 3H).  $^{13}\text{C}$  NMR (151 MHz,

$\text{CDCl}_3$ )  $\delta$  173.04, 172.25, 158.63, 155.47, 154.56, 133.16, 132.66, 130.52, 130.29, 124.10, 114.06, 80.32, 62.31, 60.32, 59.29, 57.21, 52.14, 44.60, 31.46, 29.88, 28.80, 28.11, 19.30. **HRMS (ESI) m/z:**  $[\text{M}+\text{H}]^+$  calculated value:  $\text{C}_{26}\text{H}_{36}\text{N}_4\text{O}_7$  517.2662, measured value: 517.2656.

***tert*-butyl (5R)-2-(4-ethyl-3-oxo-3,4-dihydroquinoxalin-2-yl)-5-(((S)-1-methoxy-3-methyl-1-oxobutan-2-yl)carbamoyl)pyrrolidine-1-carboxylate**

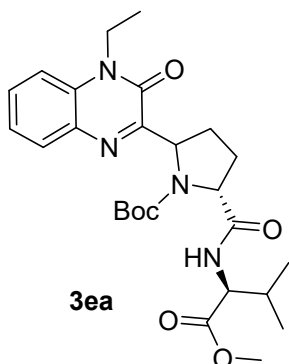

yellow oily liquid; 38.7 mg, 77% yield,  $^1\text{H}$  NMR (600 MHz, Chloroform-*d*)  $\delta$  7.77 (m, 1H), 7.58-7.49 (m, 1H), 7.38-7.26 (m, 2H), 5.58 (m, 1H), 4.71 (m, 1H), 4.59 (m, 1H), 4.38-4.25 (m, 2H), 3.74 (d,  $J = 13.8$  Hz, 3H), 2.51-2.38 (m, 1H), 2.28-2.15 (m, 2H), 1.97 (m, 1H), 1.77 (s, 1H), 1.44 (s, 4H), 1.39-1.36 (m, 3H), 1.16 (s, 5H), 0.99 (dd,  $J = 12, 6.6$  Hz, 3H), 0.92 (dd,  $J = 11.4,$

6.6 Hz, 3H).  $^{13}\text{C}$  NMR (151 MHz,  $\text{CDCl}_3$ )  $\delta$  172.40, 172.22, 158.95, 155.53, 153.38, 132.55, 132.09, 130.62, 130.23, 123.77, 113.59, 80.22, 61.29, 59.30, 57.22, 52.15,

37.20, 31.28, 29.92, 28.47, 28.13, 19.16, 12.63. **HRMS (ESI) m/z:**  $[M+H]^+$  calculated value:  $C_{26}H_{36}N_4O_6$  501.2713, measured value: 501.2715.

***tert*-butyl (2S)-2-(((S)-1-methoxy-3-methyl-1-oxobutan-2-yl)carbamoyl)-5-(3-oxo-3,4-dihydroquinoxalin-2-yl)pyrrolidine-1-carboxylate**

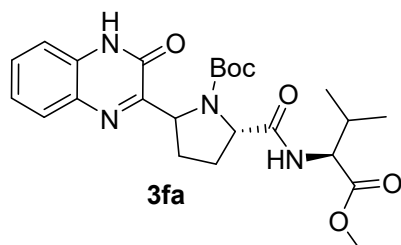

**3fa**

yellow oily liquid; 35.1 mg, 74% yield,  $^1H$  NMR (600 MHz, Chloroform-*d*)  $\delta$  7.76 (m, 1H), 7.55-7.47 (m, 1H), 7.44-7.39 (m, 1H), 7.38-7.29 (m, 1H), 5.65 (m, 1H), 4.74 (m, 1H), 4.63 (m, 1H), 3.76 (d,  $J = 18.6$  Hz, 3H), 2.56-2.44 (m, 1H), 2.41-2.06 (m, 3H), 2.05-1.97

(m, 1H), 1.44 (s, 4H), 1.18 (s, 5H), 1.01 (dd,  $J = 13.2, 7.2$  Hz, 3H), 0.93 (dd,  $J = 9.6, 6.6$  Hz, 3H).  $^{13}C$  NMR (151 MHz,  $CDCl_3$ )  $\delta$  172.57, 172.31, 159.45, 155.71, 155.45, 132.33, 131.13, 130.40, 129.33, 124.56, 115.93, 80.45, 61.30, 58.85, 57.25, 52.18, 31.28, 30.03, 28.47, 28.17, 19.19. **HRMS (ESI) m/z:**  $[M+H]^+$  calculated value:  $C_{24}H_{32}N_4O_6$  473.2400, measured value: 473.2397.

***tert*-butyl (5R)-2-(6-bromo-3-oxo-3,4-dihydroquinoxalin-2-yl)-5-(((S)-1-methoxy-3-methyl-1-oxobutan-2-yl)carbamoyl)pyrrolidine-1-carboxylate**

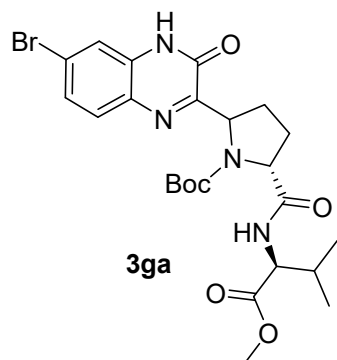

**3ga**

yellow oily liquid; 24.7 mg, 45% yield,  $^1H$  NMR (600 MHz, Chloroform-*d*)  $\delta$  7.64-7.57 (m, 1H), 7.53-7.37 (m, 2H), 5.70-5.48 (m, 1H), 4.78-4.54 (m, 2H), 3.76-3.68 (m, 3H), 2.57-2.43 (m, 1H), 2.36-2.13 (m, 3H), 2.04-1.95 (m, 1H), 1.45-1.42 (m, 4H), 1.18-1.15 (m, 5H), 1.01-0.95 (m, 3H), 0.95-0.89 (m, 3H).  $^{13}C$  NMR (151 MHz,  $CDCl_3$ )  $\delta$

172.45, 172.29, 159.93, 158.74, 155.26, 132.38, 131.03, 130.46, 127.79, 124.19, 118.64, 80.48, 61.16, 58.78, 57.28, 52.15, 31.16, 29.89, 28.81, 28.12, 19.13. **HRMS (ESI) m/z:**  $[M+H]^+$  calculated value:  $C_{24}H_{31}BrN_4O_6$  551.1505, measured value: 551.1511.

**tert-butyl (5R)-2-(6-chloroimidazo[1,2-b]pyridazin-2-yl)-5-(((S)-1-methoxy-3-methyl-1-oxobutan-2-yl)carbamoyl)pyrrolidine-1-carboxylate**

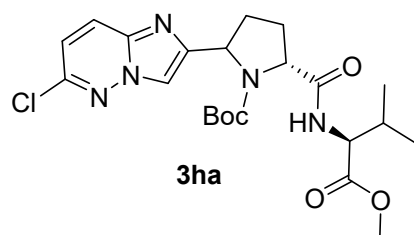

yellow oily liquid; 38.4 mg, 80% yield,  $^1\text{H NMR}$  (600 MHz, Chloroform-*d*)  $\delta$  7.91-7.66 (m, 3H), 5.62 (m, 1H), 4.74-4.55 (m, 2H), 3.71 (dd,  $J = 14.4, 1.8$  Hz, 3H), 2.33-2.23 (m, 2H), 2.22-2.15 (m, 1H), 2.10-

1.97 (m, 2H), 1.38 (d,  $J = 1.8$  Hz, 4H), 1.14 (d,  $J = 1.8$  Hz, 5H), 0.96-0.92 (m, 3H), 0.88 (m, 3H).  $^{13}\text{C NMR}$  (151 MHz,  $\text{CDCl}_3$ )  $\delta$  172.09, 171.17, 154.47, 146.86, 143.92, 136.29, 133.94, 117.40, 113.56, 81.41, 60.88, 57.50, 57.33, 52.15, 31.64, 31.08, 29.60, 28.02, 19.07. **HRMS (ESI) m/z:**  $[\text{M}+\text{H}]^+$  calculated value:  $\text{C}_{22}\text{H}_{30}\text{ClN}_5\text{O}_5$  480.2014, measured value: 480.2014.

**tert-butyl (5R)-2-(4-bromoisoquinolin-1-yl)-5-(((S)-1-methoxy-3-methyl-1-oxobutan-2-yl)carbamoyl)pyrrolidine-1-carboxylate**

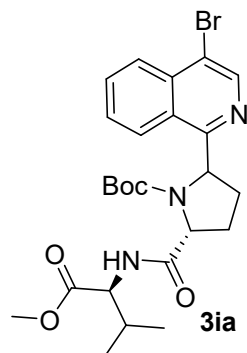

yellow oily liquid; 32 mg, 60% yield,  $^1\text{H NMR}$  (400 MHz, Chloroform-*d*)  $\delta$  8.61 (m, 1H), 8.29-8.16 (m, 2H), 7.87-7.62 (m, 2H), 5.95-5.67 (m, 1H), 4.80-4.67 (m, 1H), 4.62-4.49 (m, 1H), 3.66 (d,  $J = 10.8$  Hz, 3H), 2.59-2.47 (m, 1H), 2.45-2.30 (m, 2H), 2.30-2.18 (m, 1H), 2.05-1.97 (m, 1H), 1.41 (s, 5H), 1.25 (s, 1H), 1.17-1.11 (m, 3H), 1.11-1.04 (m, 3H), 0.95 (s, 3H).  $^{13}\text{C NMR}$

(101 MHz,  $\text{CDCl}_3$ )  $\delta$  174.06, 172.70, 160.33, 154.26, 142.86, 135.36, 131.76, 128.58, 128.55, 127.10, 124.52, 119.04, 81.07, 62.99, 59.83, 57.42, 51.93, 31.43, 31.04, 30.29, 28.40, 19.53. **HRMS (ESI) m/z:**  $[\text{M}+\text{H}]^+$  calculated value:  $\text{C}_{25}\text{H}_{32}\text{BrN}_3\text{O}_5$  534.1604, measured value: 534.1603.

**tert-butyl (2S)-2-(((S)-1-methoxy-3-methyl-1-oxobutan-2-yl)carbamoyl)-5-(phenanthridin-6-yl)pyrrolidine-1-carboxylate**

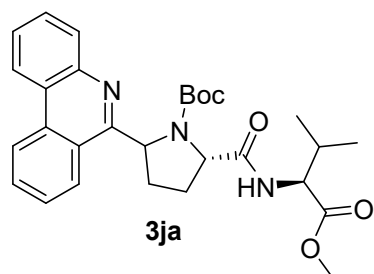

yellow oily liquid; 36.8 mg, 73% yield,  $^1\text{H NMR}$  (600 MHz, Chloroform-*d*)  $\delta$  8.68 (m, 1H), 8.57 (m, 1H), 8.28 (dd,  $J = 15, 8.4$  Hz, 1H), 8.19-8.07 (m, 1H), 7.92-7.82

(m, 1H), 7.76-7.60 (m, 3H), 5.98-5.80 (m, 1H), 4.81-4.60 (m, 2H), 3.32 (m, 3H), 2.68-2.57 (m, 1H), 2.52-2.30 (m, 3H), 2.21-2.05 (m, 1H), 1.44 (s, 5H), 1.19 (m, 3H), 1.11 (dd,  $J = 12.6, 6.6$  Hz, 3H), 0.92 (s, 4H).  $^{13}\text{C}$  NMR (151 MHz,  $\text{CDCl}_3$ )  $\delta$  173.94, 172.26, 160.94, 154.08, 143.18, 133.51, 130.89, 129.68, 128.44, 127.61, 126.92, 125.30, 123.93, 122.77, 122.17, 80.02, 62.42, 60.45, 57.55, 51.63, 33.01, 31.66, 30.30, 28.46, 19.44. **HRMS (ESI) m/z:**  $[\text{M}+\text{H}]^+$  calculated value:  $\text{C}_{29}\text{H}_{35}\text{N}_3\text{O}_5$  506.2655, measured value: 506.2642.

***tert*-butyl (2*S*)-2-(((*S*)-1-methoxy-3-methyl-1-oxobutan-2-yl)carbamoyl)-5-(quinazolin-2-yl)pyrrolidine-1-carboxylate**

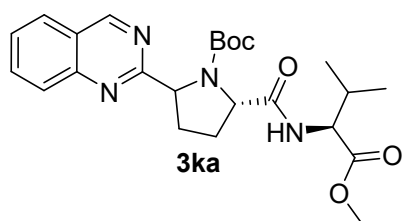

yellow oily liquid; 23.7 mg, 52% yield,  $^1\text{H}$  NMR (600 MHz, Chloroform-*d*)  $\delta$  9.22 (d,  $J = 39.6$  Hz, 1H), 8.19-8.05 (m, 2H), 7.99-7.89 (m, 1H), 7.73-7.64 (m, 1H), 5.91-5.72 (m, 1H), 4.80-4.71 (m,

1H), 4.63-4.52 (m, 1H), 3.64 (d,  $J = 16.2$  Hz, 3H), 2.59-2.51 (m, 1H), 2.50-2.38 (m, 1H), 2.39-2.23 (m, 2H), 2.22-2.09 (m, 1H), 1.41 (s, 5H), 1.16-1.04 (m, 6H), 0.96 (s, 4H).  $^{13}\text{C}$  NMR (151 MHz,  $\text{CDCl}_3$ )  $\delta$  173.77, 172.58, 170.21, 154.21, 154.05, 150.47, 134.30, 129.52, 128.18, 123.73, 122.53, 81.37, 62.87, 59.45, 57.43, 51.98, 32.34, 31.34, 28.40, 27.87, 19.53. **HRMS (ESI) m/z:**  $[\text{M}+\text{H}]^+$  calculated value:  $\text{C}_{24}\text{H}_{32}\text{N}_4\text{O}_5$  457.2451, measured value: 457.2438.

***tert*-butyl (2*S*)-2-(((*R*)-1-(((*S*)-3-hydroxy-1-methoxy-1-oxopropan-2-yl)amino)-3-methyl-1-oxobutan-2-yl)carbamoyl)-5-(4-methyl-3-oxo-3,4-dihydroquinoxalin-2-yl)pyrrolidine-1-carboxylate**

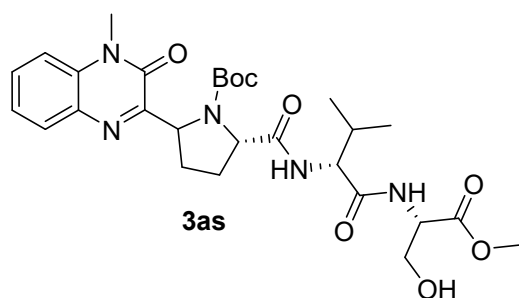

yellow oily liquid; 36.2 mg, 63% yield,  $^1\text{H}$  NMR (400 MHz, Chloroform-*d*)  $\delta$  7.80-7.68 (m, 1H), 7.59-7.48 (m, 1H), 7.37-7.29 (m, 2H), 5.69-5.42 (m, 1H), 4.72-4.60 (m, 2H), 4.45-4.32 (m, 1H), 3.96-3.90 (m, 2H),

3.78 (d,  $J = 6$  Hz, 3H), 3.69 (d,  $J = 17.6$  Hz, 3H), 2.60-2.37 (m, 1H), 2.37-2.25 (m, 1H),

2.25-2.15 (m, 1H), 2.02-1.94 (m, 1H), 1.43 (d,  $J = 9.2$  Hz, 3H), 1.17 (d,  $J = 11.2$  Hz, 6H), 1.09-1.01 (m, 3H), 1.01-0.96 (m, 3H).  $^{13}\text{C}$  NMR (151 MHz,  $\text{CDCl}_3$ )  $\delta$  173.27, 171.45, 170.76, 158.63, 155.36, 154.01, 133.21, 132.20, 130.37, 130.28, 124.03, 113.80, 81.05, 62.84, 61.54, 59.84, 58.59, 55.15, 52.69, 30.29, 29.76, 29.02, 28.42, 28.16, 19.46. **HRMS (ESI) m/z:**  $[\text{M}+\text{H}]^+$  calculated value:  $\text{C}_{28}\text{H}_{39}\text{N}_5\text{O}_8$  574.2877, measured value: 574.2891.

***tert*-butyl 2-((4-benzyl-13-(3-(*tert*-butoxy)-3-oxopropyl)-7,17-dimethyl-3,6,9,12,15-pentaoxo-2-oxa-5,8,11,14-tetraazaoctadecan-16-yl)carbamoyl)-5-(4-methyl-3-oxo-3,4-dihydroquinoxalin-2-yl)pyrrolidine-1-carboxylate**

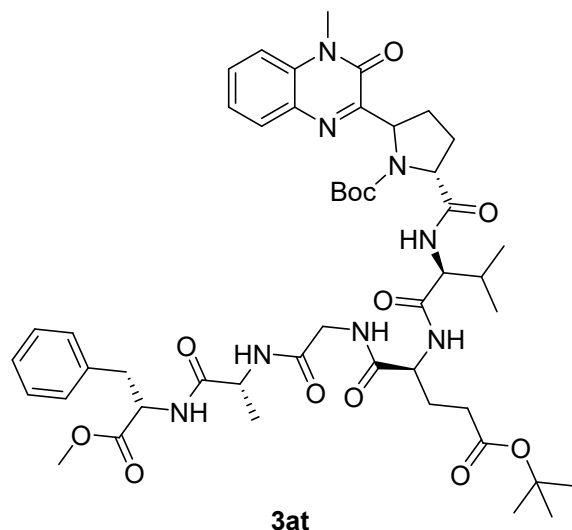

yellow oily liquid; 28.5 mg, 30% yield,  
<sup>1</sup>H NMR (400 MHz, Chloroform-*d*) δ 7.65-7.60 (m, 1H), 7.57-7.49 (m, 2H), 7.33-7.29 (m, 1H), 7.28-7.26 (m, 1H), 7.24-7.20 (m, 2H), 7.18-7.14 (m, 2H), 5.67-5.50 (m, 1H), 4.84-4.77 (m, 1H), 4.60-4.44 (m, 2H), 4.13-3.95 (m, 4H), 3.69 (d, *J* = 3.2 Hz, 6H), 3.18-3.05 (m, 2H), 2.41-2.31 (m, 3H), 2.30-2.19 (m,

2H), 2.14-2.06 (m, 2H), 2.05-1.97 (m, 2H), 1.44-1.39 (m, 11H), 1.25 (s, 3H), 1.13 (s, 7H), 1.03 (d, *J* = 6.8 Hz, 3H), 1.00 (d, *J* = 6.8 Hz, 3H). **HRMS (ESI) m/z:** [M+H]<sup>+</sup> caalue: C<sub>48</sub>H<sub>66</sub>N<sub>8</sub>O<sub>12</sub> 947.4898, measured value: 947.4901.

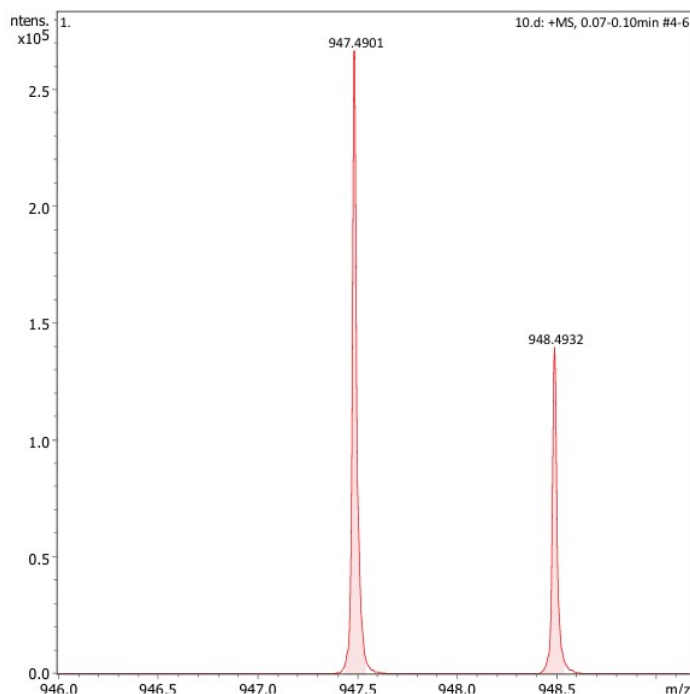

| Meas. m/z | # | Ion Formula                                                    | m/z err [ppm] | mSigma | # mSigmaScore | rdb    | e <sup>-</sup> | Conf   |
|-----------|---|----------------------------------------------------------------|---------------|--------|---------------|--------|----------------|--------|
| 947.4901  | 1 | C <sub>48</sub> H <sub>67</sub> N <sub>8</sub> O <sub>12</sub> | -2.9          | 24.6   | 1             | 100.00 | 20.0           | evenok |

***tert*-butyl 2-((10-(3-(*tert*-butoxy)-3-oxopropyl)-7-(*tert*-butoxymethyl)-4-isopropyl-18,18-dimethyl-3,6,9,12,16-pentaoxo-2,17-dioxa-5,8,11-triazanonadecan-13-yl)ca**

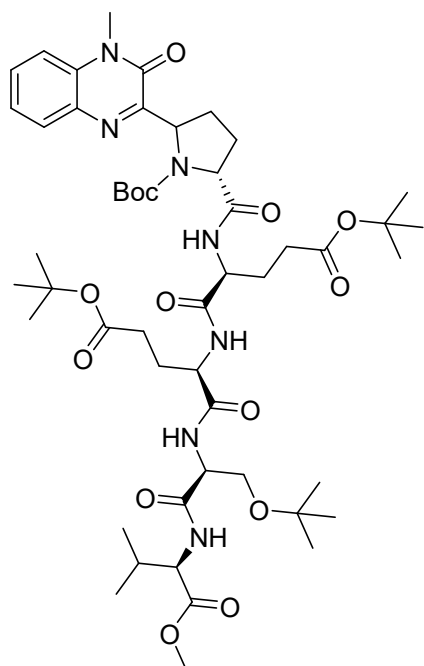

**3au**

**rbamoyl)-5-(4-methyl-3-oxo-3,4-dihydroquinoxalin-2-yl)pyrrolidine-1-carboxylate**

yellow oily liquid; 34.1 mg, 34% yield, <sup>1</sup>H NMR (400 MHz, Chloroform-*d*) δ 7.51-7.38 (m, 1H), 7.37-7.28 (m, 1H), 7.25-7.11 (m, 2H), 4.58-4.33 (m, 5H), 4.22-4.06 (m, 1H), 3.81-3.64 (m, 5H), 3.54-3.31 (m, 3H), 2.45-2.30 (m, 4H), 2.29-2.22 (m, 2H), 2.21-2.10 (m, 4H), 2.02 (s, 1H), 1.95-1.78 (m, 3H), 1.42 (s, 28H), 1.20 (s, 8H), 0.94-0.87 (m, 6H). **HRMS (ESI) m/z:** [M+H]<sup>+</sup> calculated value: C<sub>50</sub>H<sub>77</sub>N<sub>7</sub>O<sub>14</sub> 1000.5607, measured value: 1000.5614.

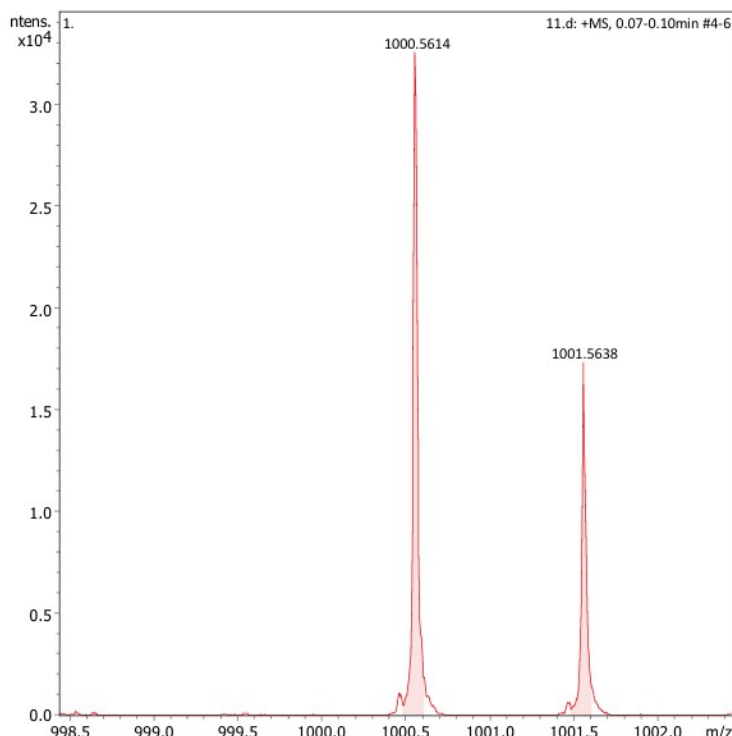

| Meas. m/z | # | Ion Formula                                                    | m/z       | err [ppm] | mSigma | # | mSigmaScore | rdb  | e <sup>-</sup> | Conf |
|-----------|---|----------------------------------------------------------------|-----------|-----------|--------|---|-------------|------|----------------|------|
| 1000.5614 | 1 | C <sub>50</sub> H <sub>78</sub> N <sub>7</sub> O <sub>14</sub> | 1000.5601 | -1.3      | 35.2   | 1 | 100.00      | 16.0 | evenok         |      |

## 6. Copies of NMR spectra

$^1\text{H}$  NMR (600 MHz,  $\text{CDCl}_3$ ) spectrum of **3aa**

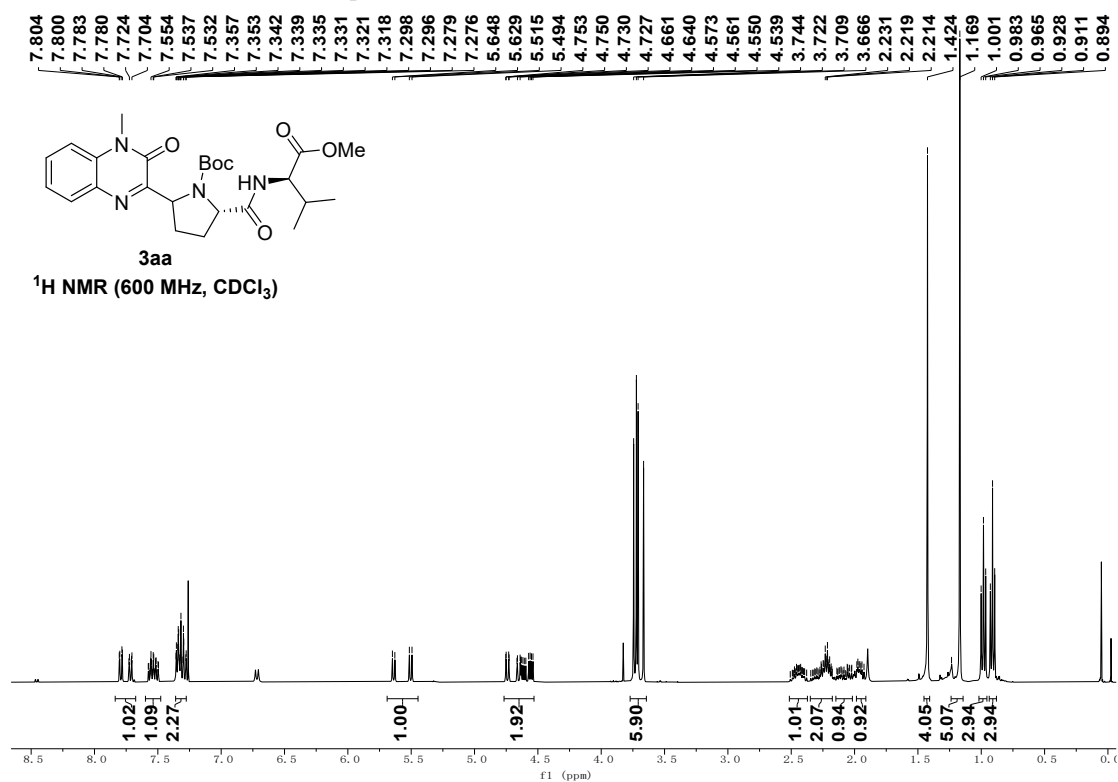

$^{13}\text{C}$  NMR (151 MHz,  $\text{CDCl}_3$ ) spectrum of **3aa**

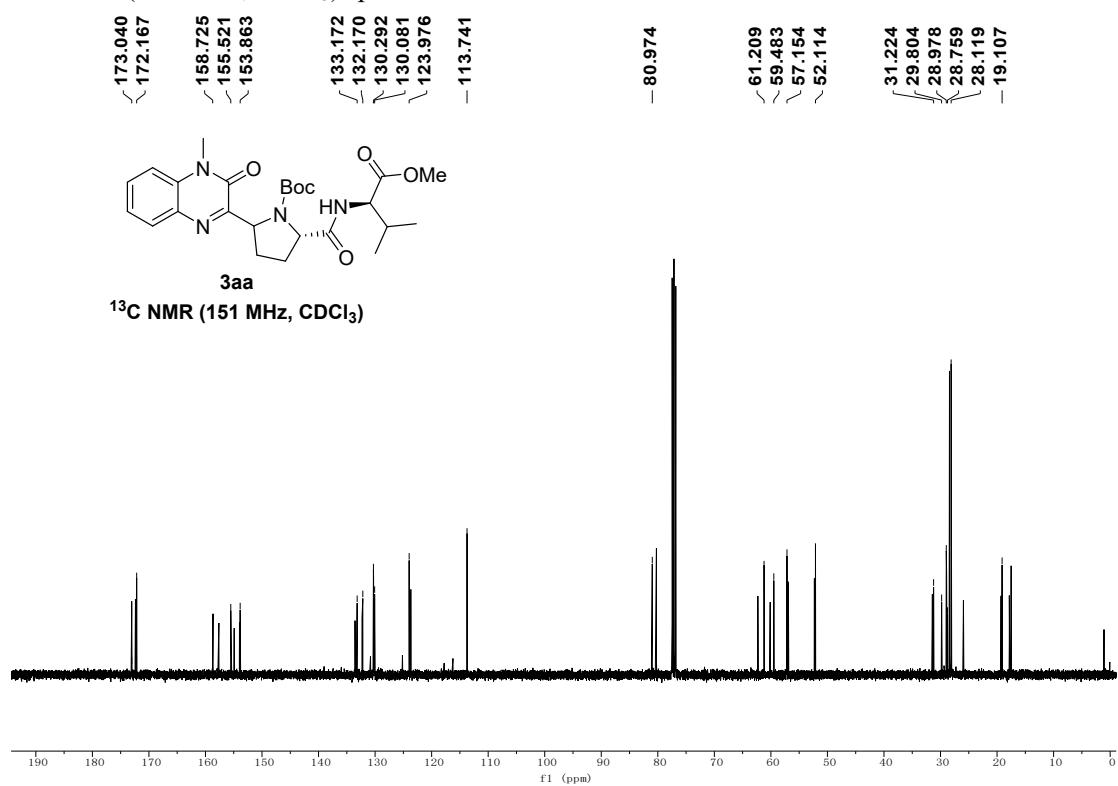

$^1\text{H}$  NMR (600 MHz,  $\text{CDCl}_3$ ) spectrum of **3ab**

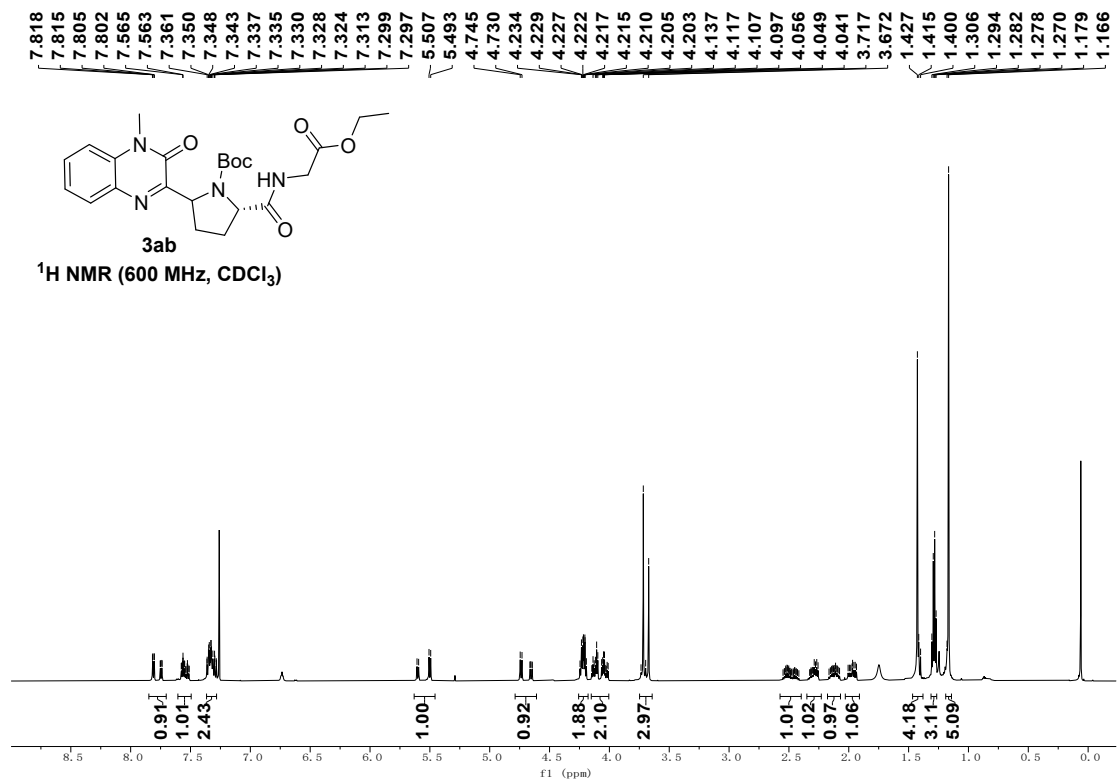

<sup>13</sup>C NMR (151 MHz, CDCl<sub>3</sub>) spectrum of **3ab**

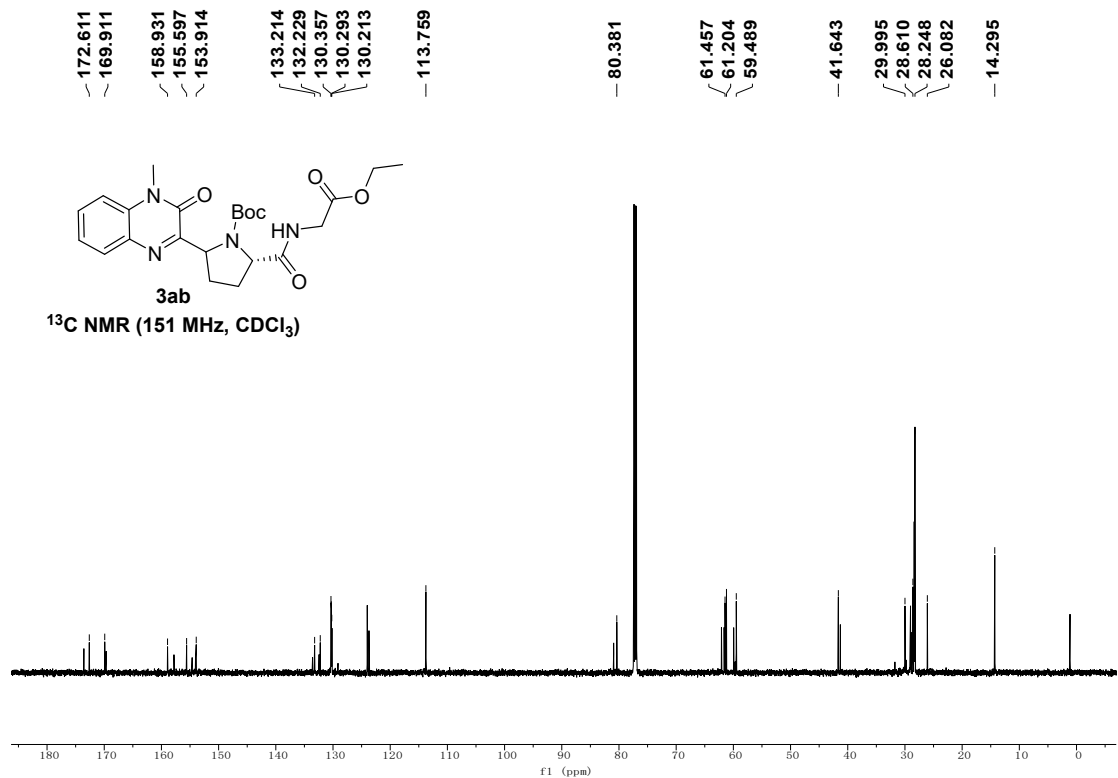

<sup>1</sup>H NMR (600 MHz, CDCl<sub>3</sub>) spectrum of **3ac**

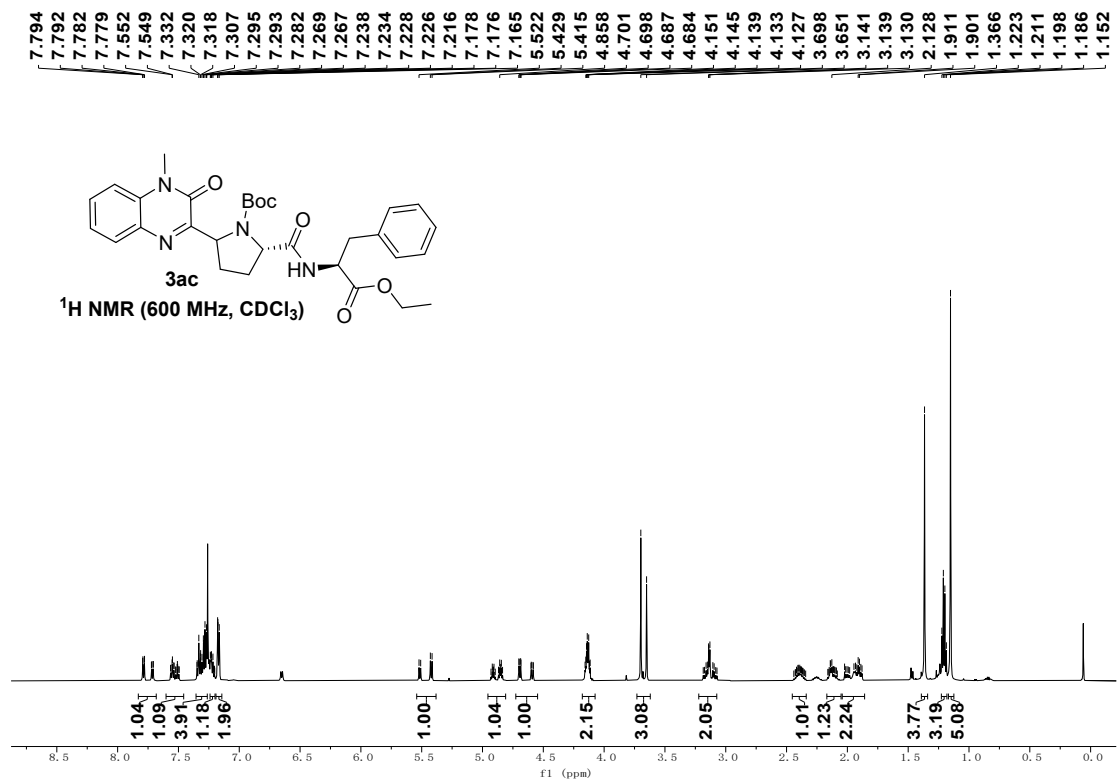

**<sup>13</sup>C NMR (151 MHz, CDCl<sub>3</sub>) spectrum of 3ac**

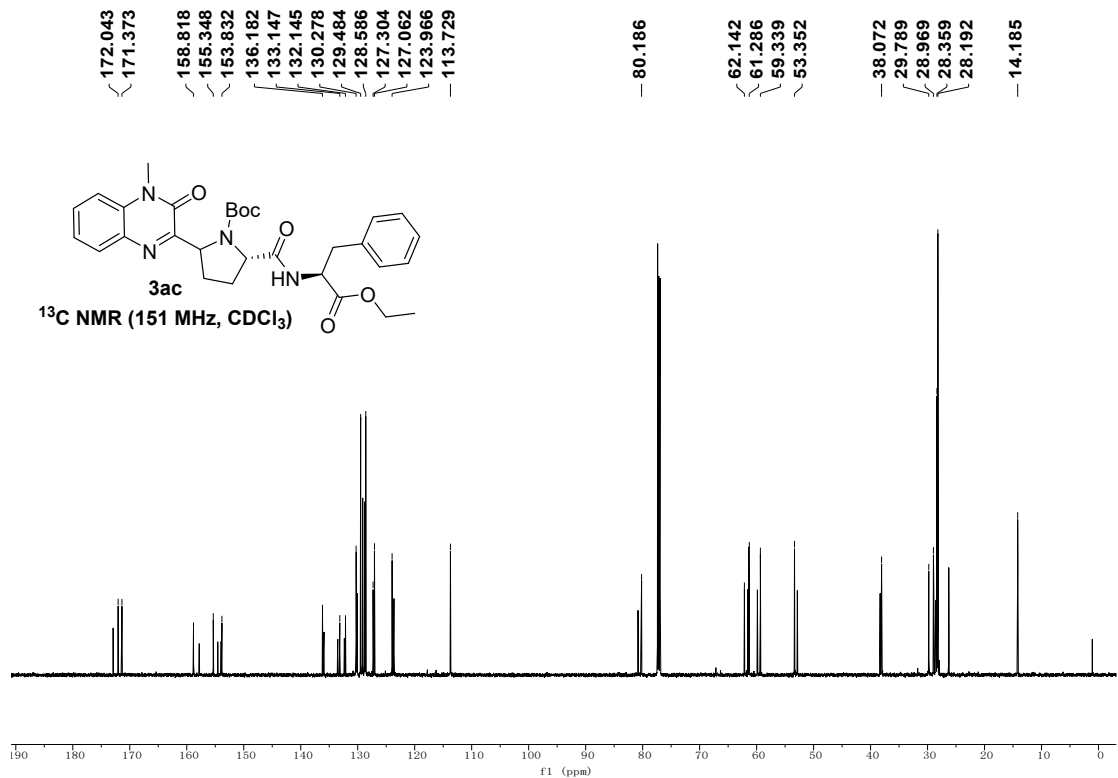

**<sup>1</sup>H NMR (600 MHz, CDCl<sub>3</sub>) spectrum of 3ad**

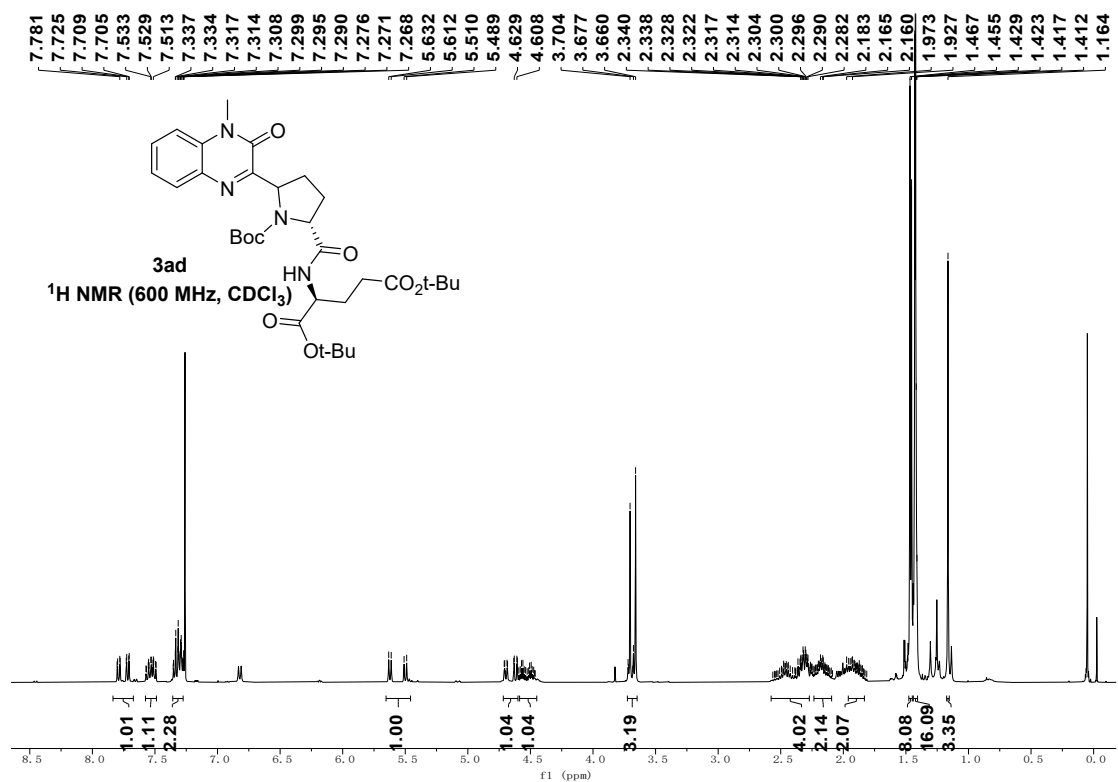

<sup>13</sup>C NMR (151 MHz, CDCl<sub>3</sub>) spectrum of **3ad**

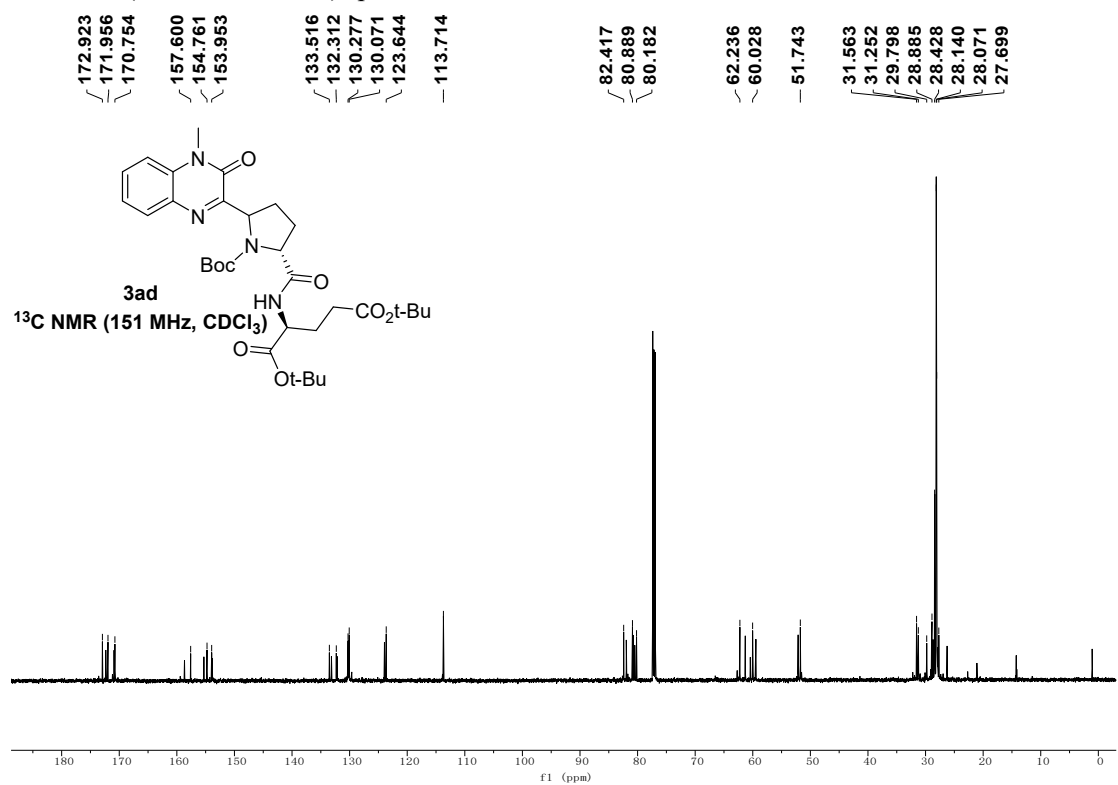

<sup>1</sup>H NMR (600 MHz, CDCl<sub>3</sub>) spectrum of **3ae**

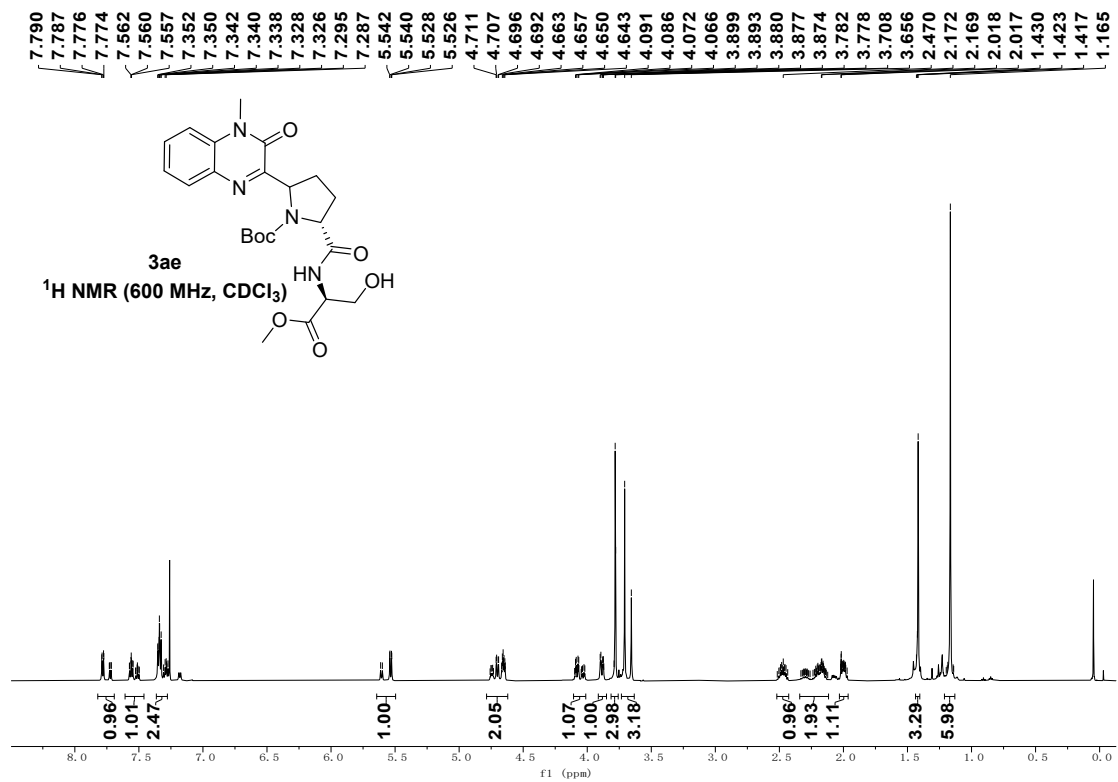

<sup>13</sup>C NMR (151 MHz, CDCl<sub>3</sub>) spectrum of **3ae**

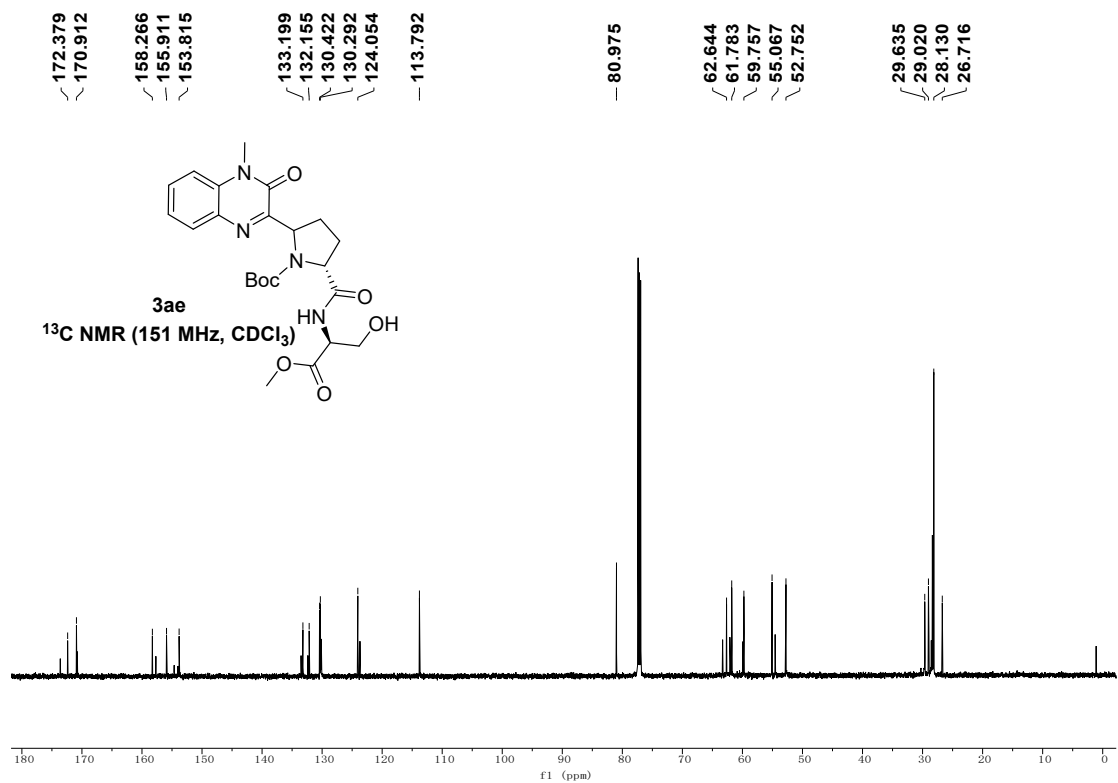

<sup>1</sup>H NMR (600 MHz, CDCl<sub>3</sub>) spectrum of **3af**

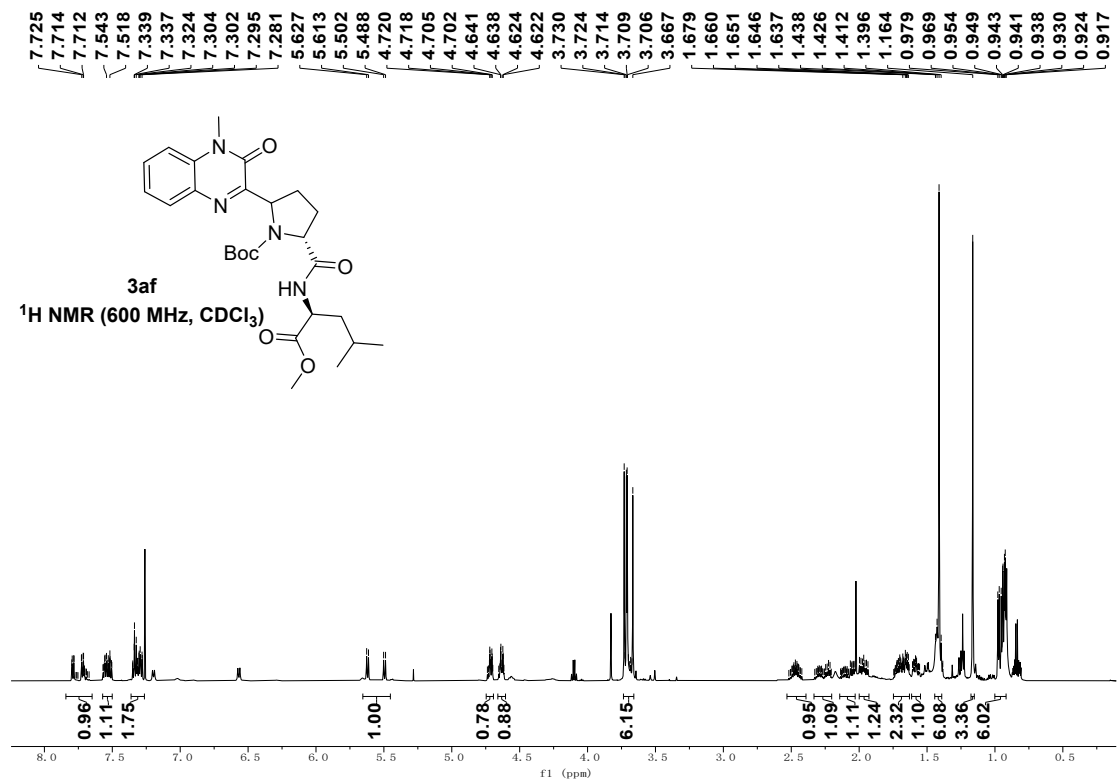

<sup>13</sup>C NMR (151 MHz, CDCl<sub>3</sub>) spectrum of **3af**

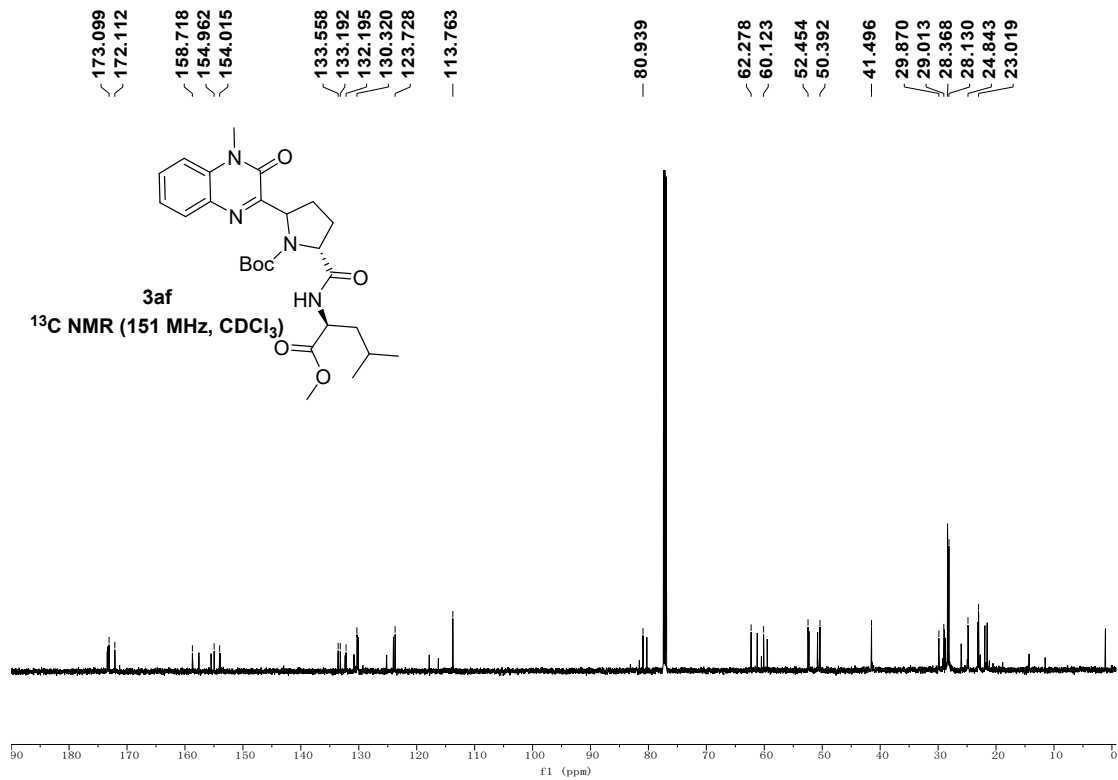

<sup>1</sup>H NMR (600 MHz, CDCl<sub>3</sub>) spectrum of **3ag**

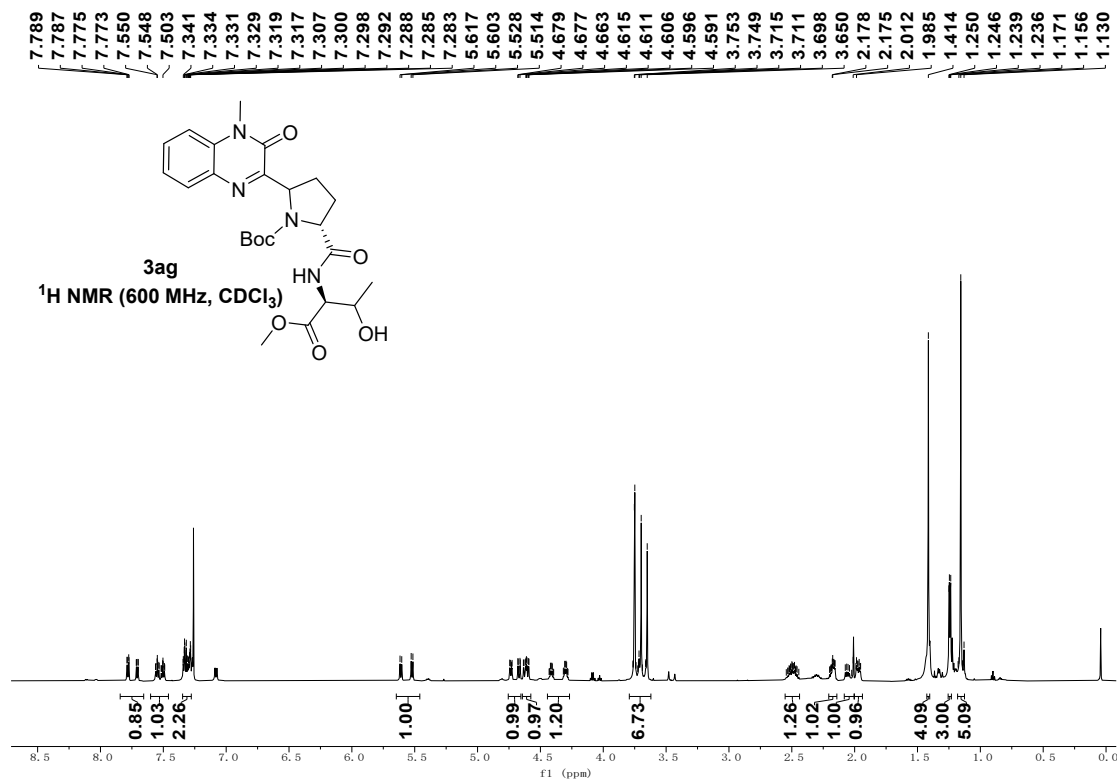

<sup>13</sup>C NMR (151 MHz, CDCl<sub>3</sub>) spectrum of **3ag**

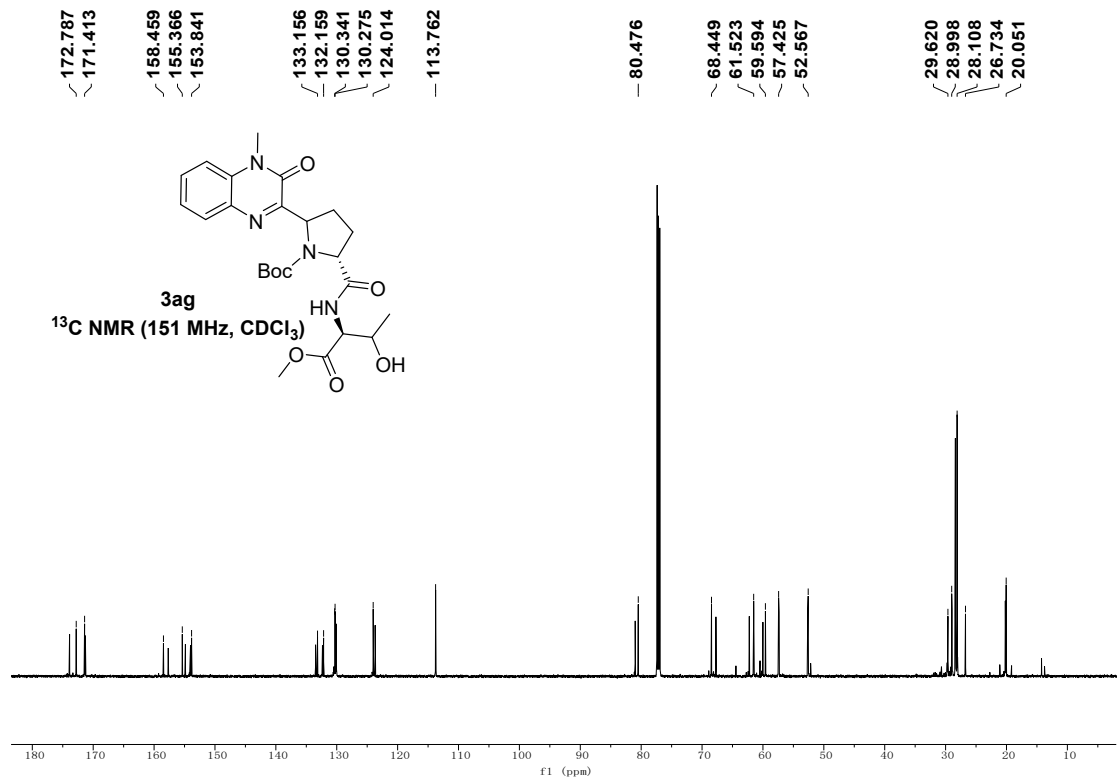

<sup>1</sup>H NMR (600 MHz, CDCl<sub>3</sub>) spectrum of **3ah**

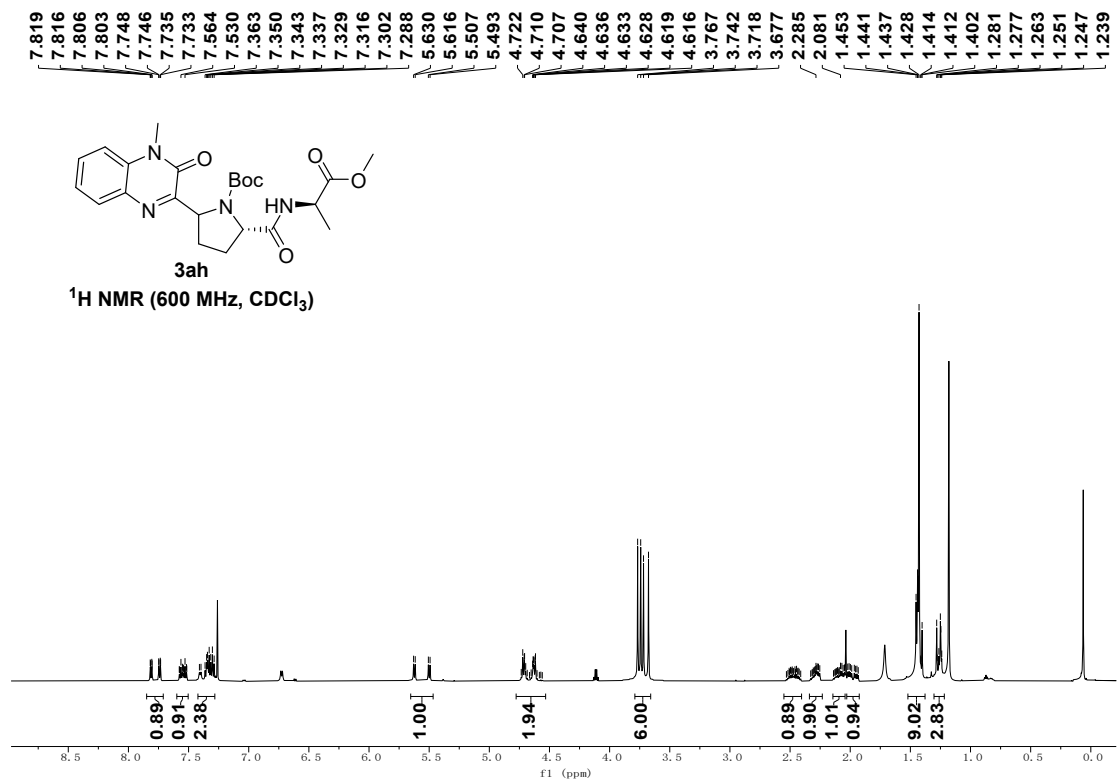

**<sup>13</sup>C NMR (151 MHz, CDCl<sub>3</sub>) spectrum of 3ah**

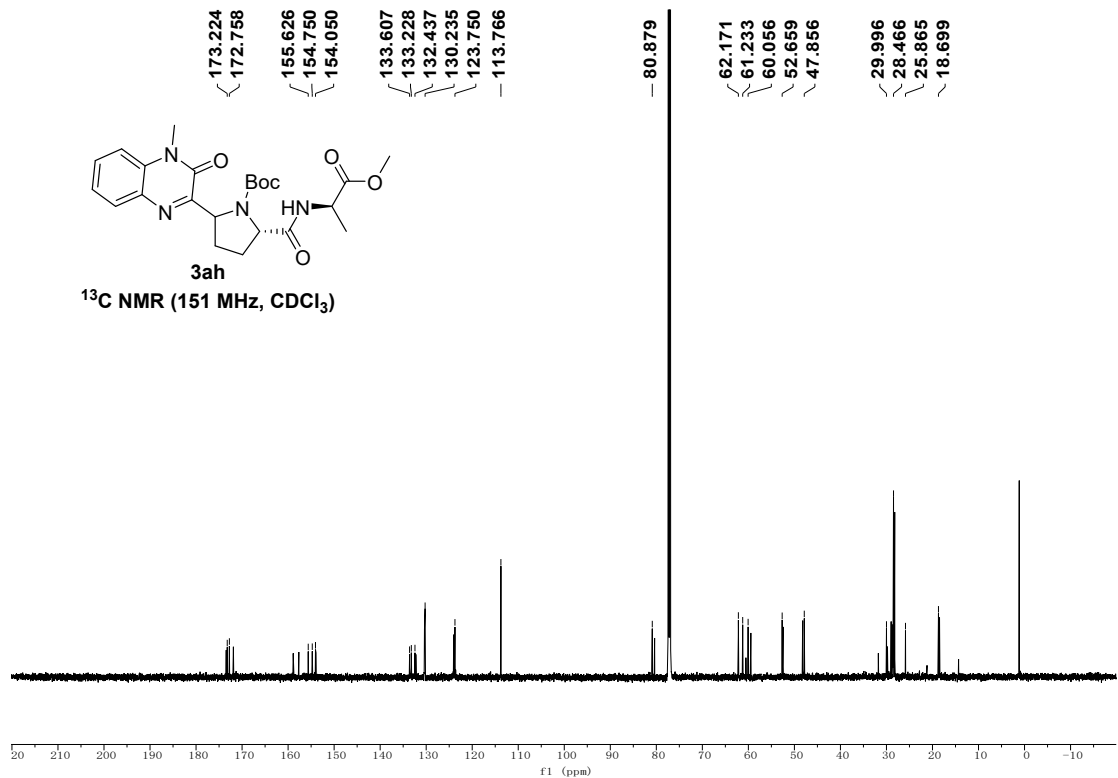

**<sup>1</sup>H NMR (600 MHz, CDCl<sub>3</sub>) spectrum of 3ai**

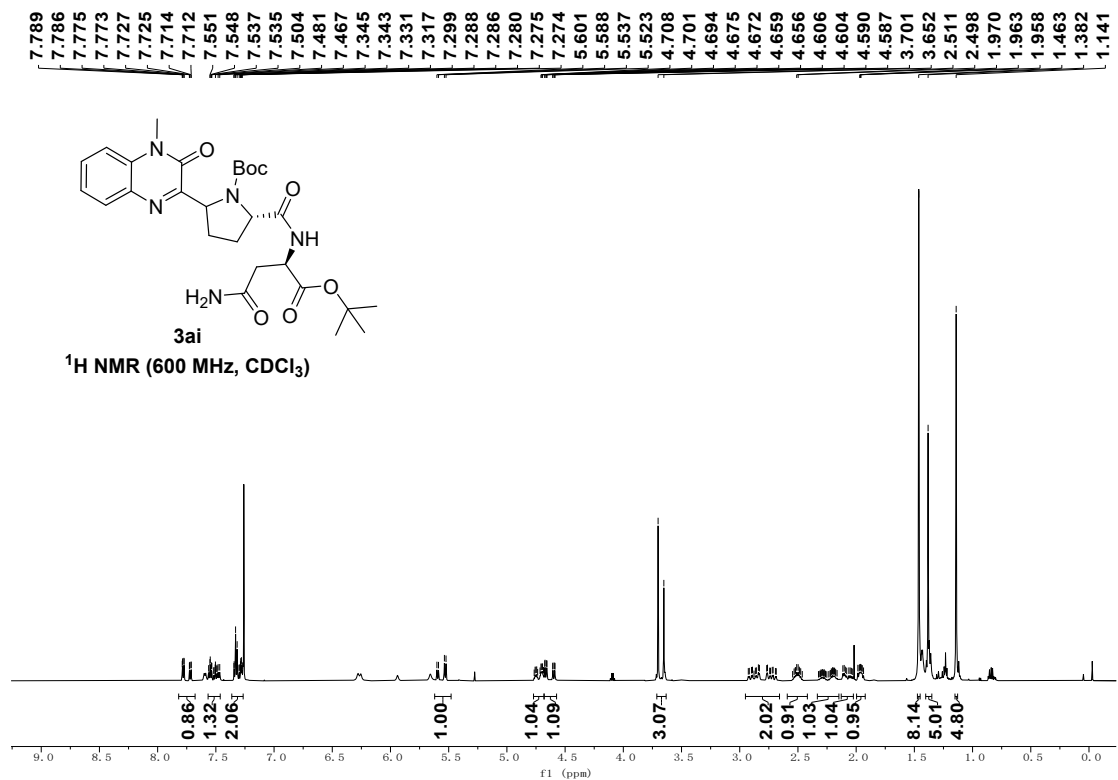

**<sup>13</sup>C NMR (151 MHz, CDCl<sub>3</sub>) spectrum of **3ai****

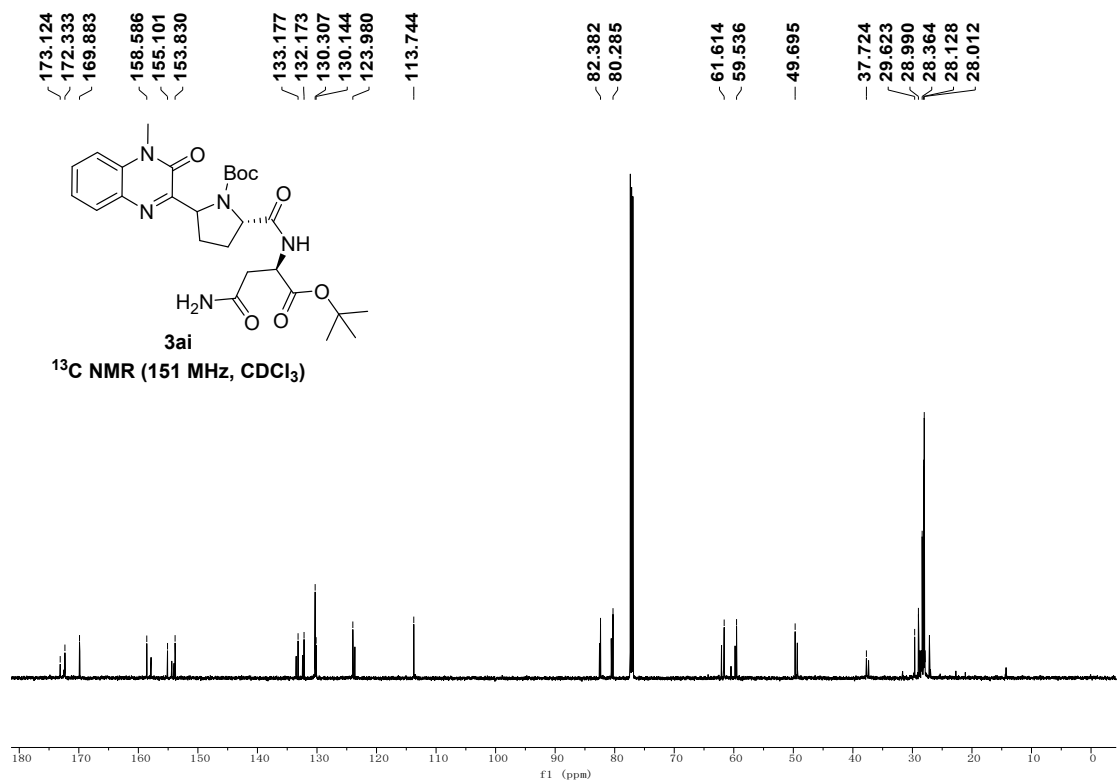

**<sup>1</sup>H NMR (600 MHz, CDCl<sub>3</sub>) spectrum of **3aj****

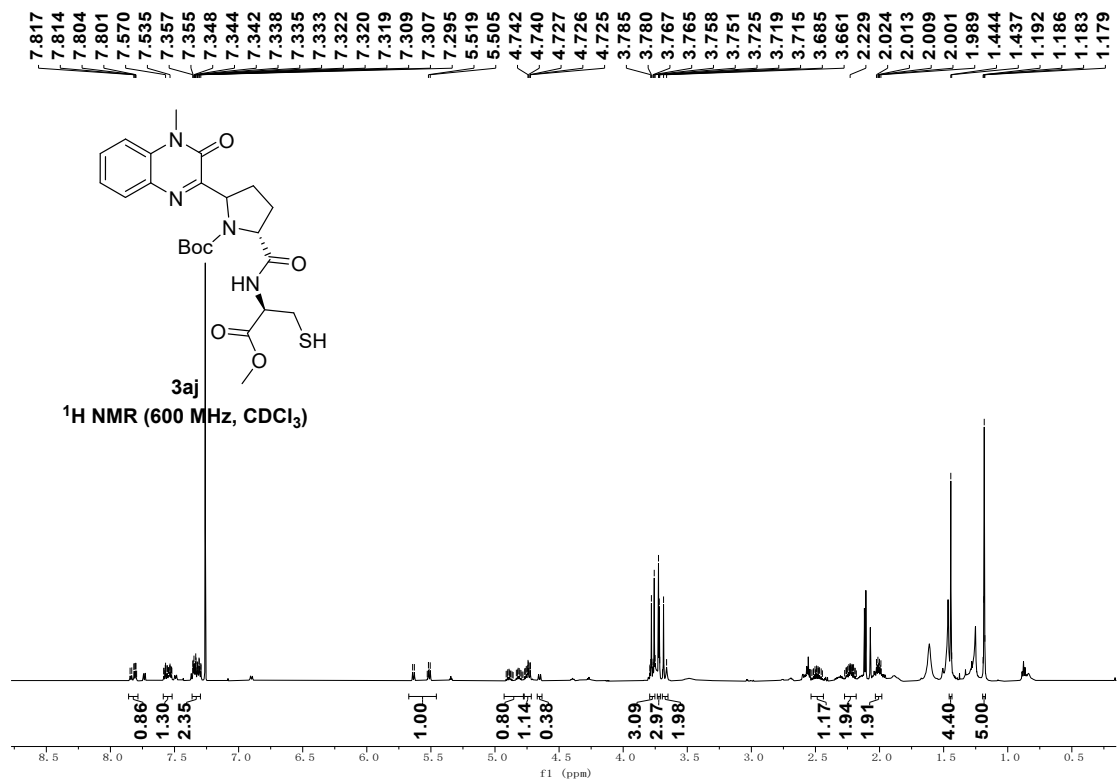

**<sup>13</sup>C NMR (151 MHz, CDCl<sub>3</sub>) spectrum of **3aj****

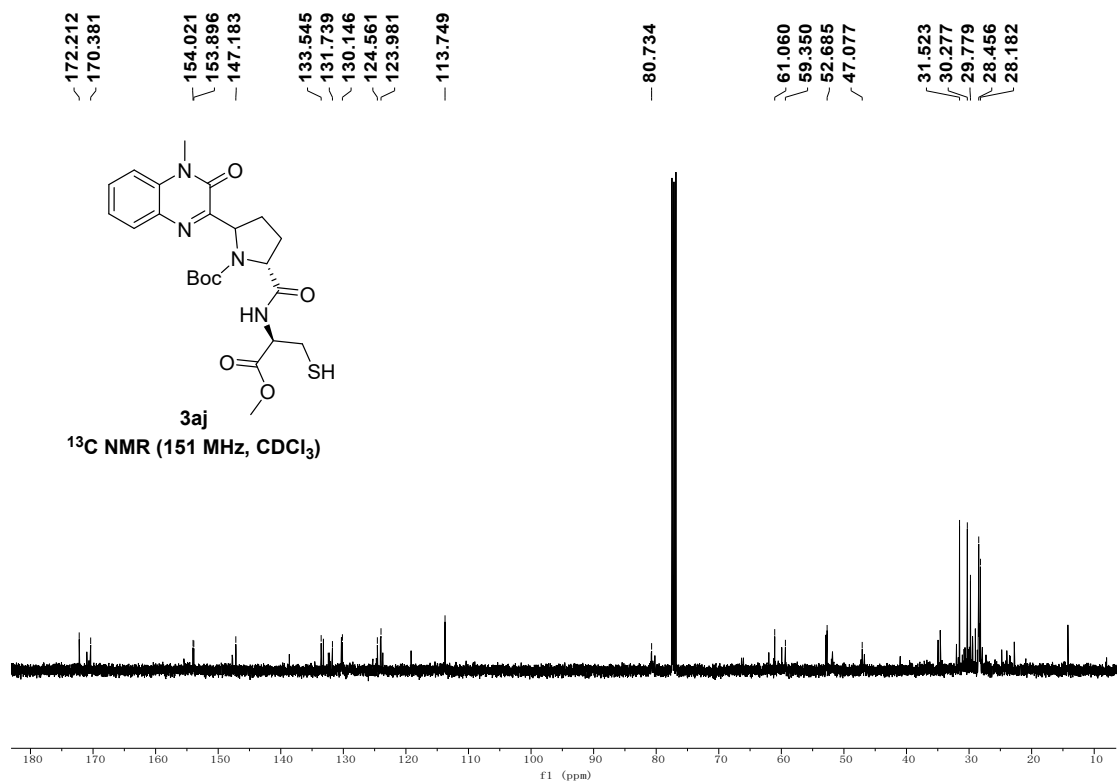

**<sup>1</sup>H NMR (400 MHz, CDCl<sub>3</sub>) spectrum of **3ak****

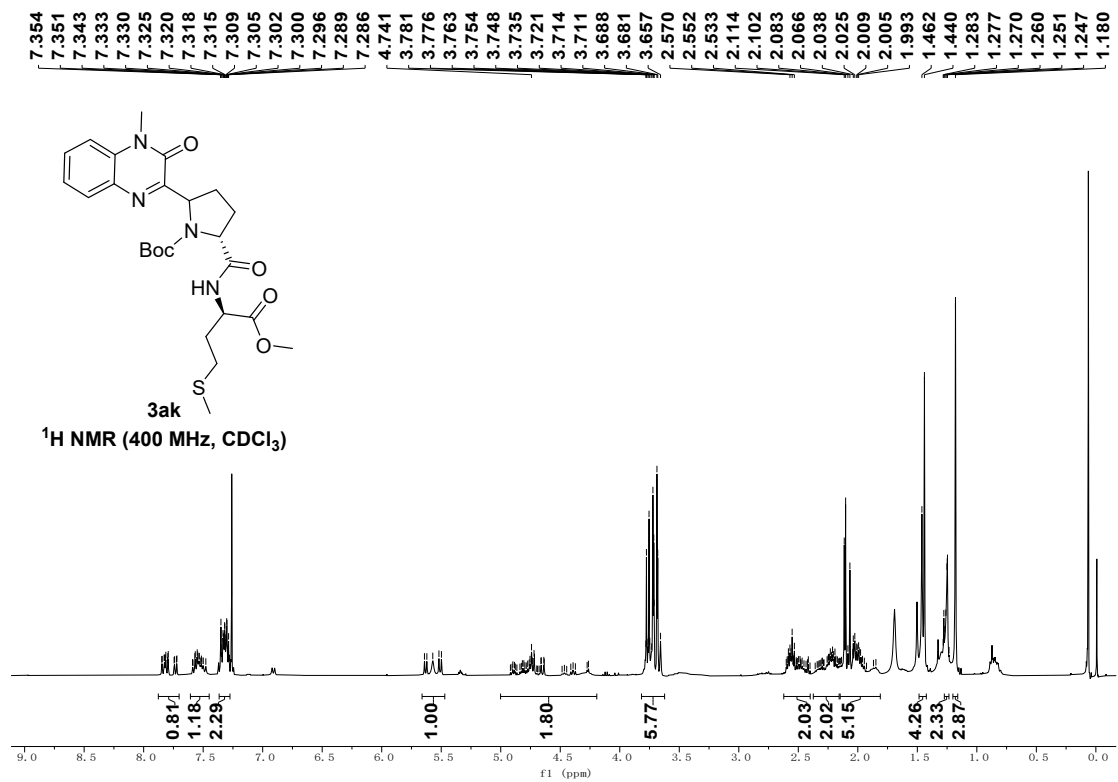

**<sup>13</sup>C NMR (151 MHz, CDCl<sub>3</sub>) spectrum of **3ak****

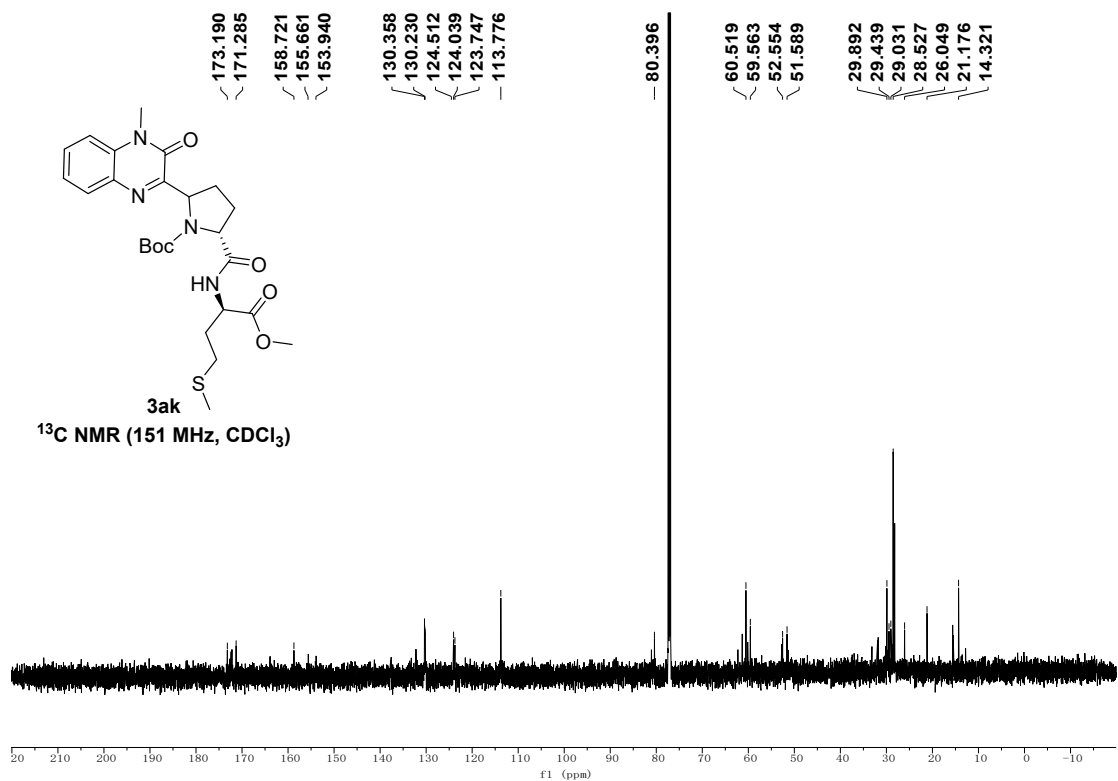

**<sup>1</sup>H NMR (600 MHz, CDCl<sub>3</sub>) spectrum of **3al****

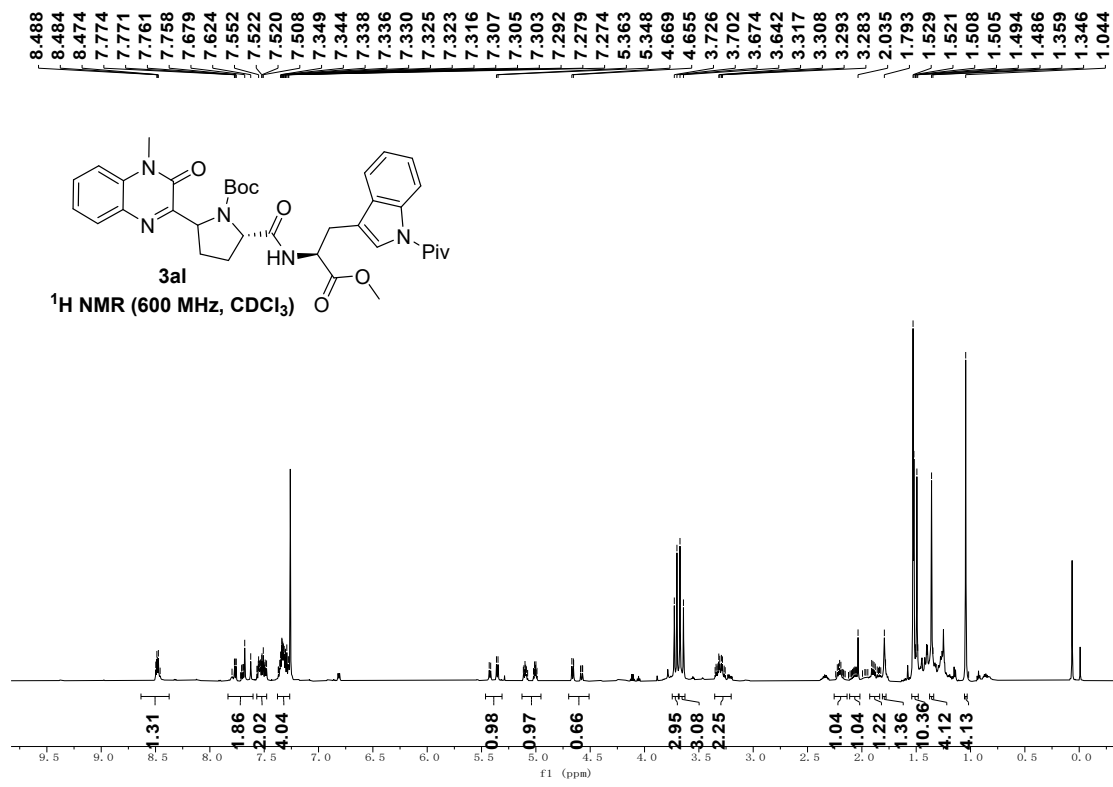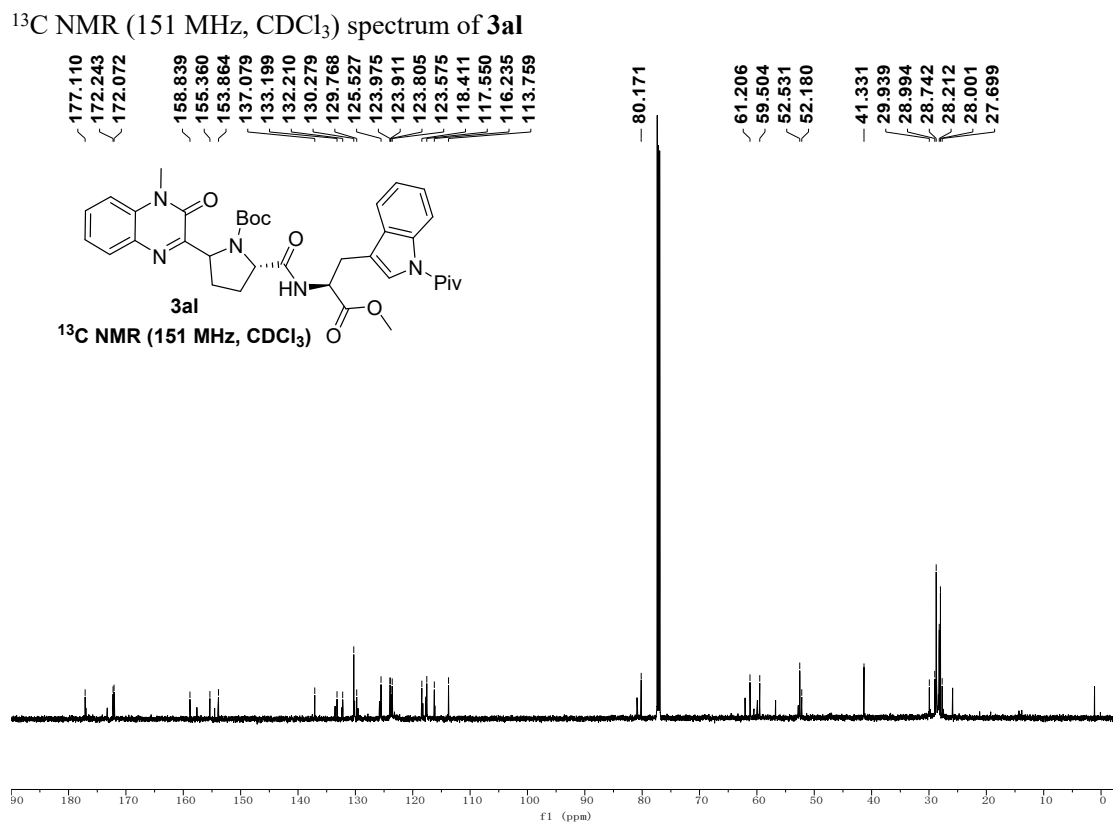

**<sup>1</sup>H NMR (600 MHz, CDCl<sub>3</sub>) spectrum of 3am**

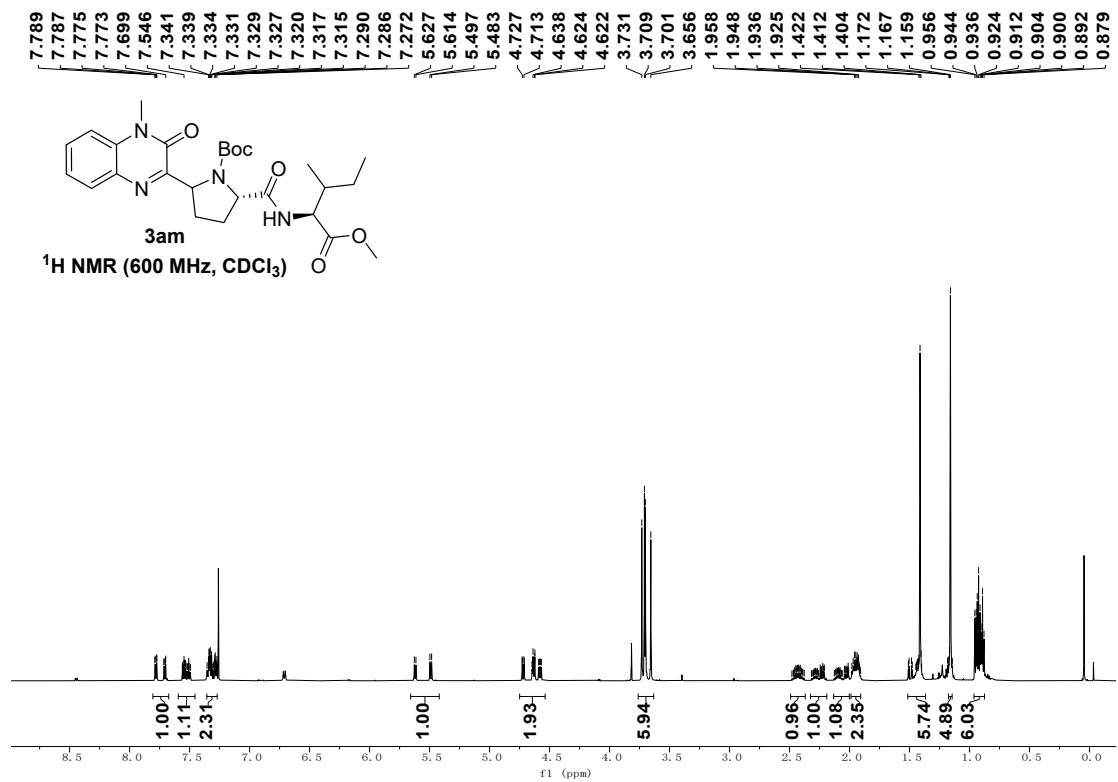

**<sup>13</sup>C NMR (151 MHz, CDCl<sub>3</sub>) spectrum of 3am**

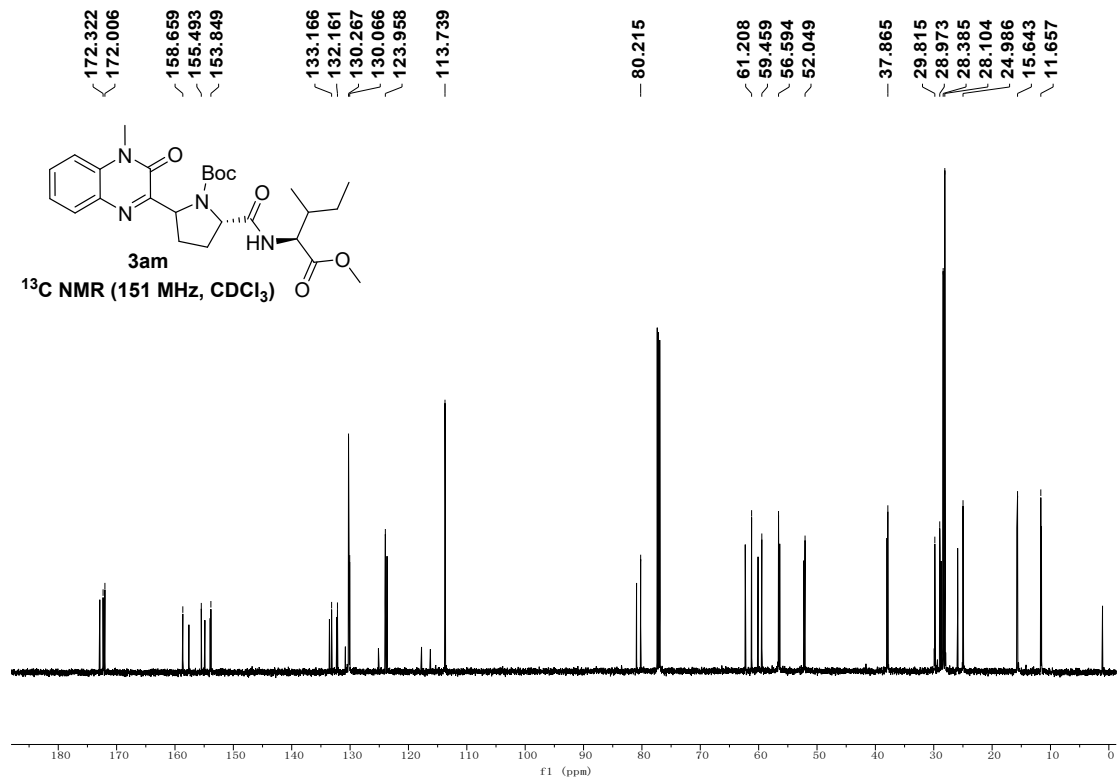

**<sup>1</sup>H NMR (600 MHz, CDCl<sub>3</sub>) spectrum of 3an**

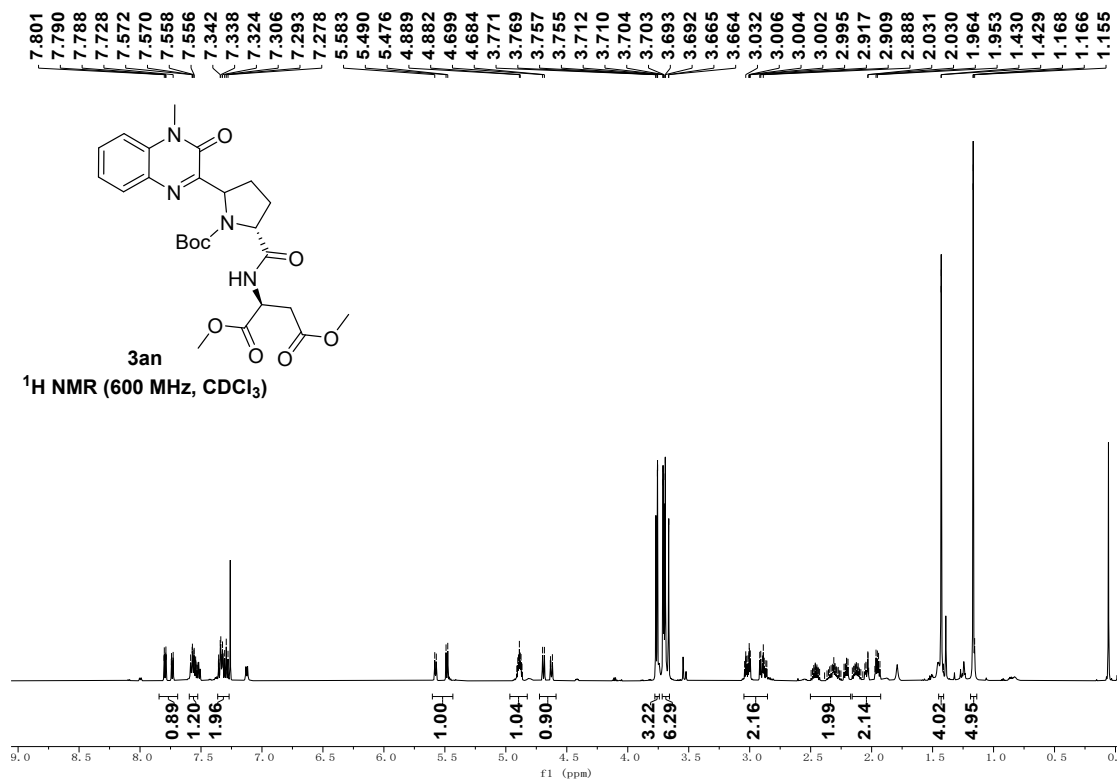

**<sup>13</sup>C NMR (151 MHz, CDCl<sub>3</sub>) spectrum of 3an**

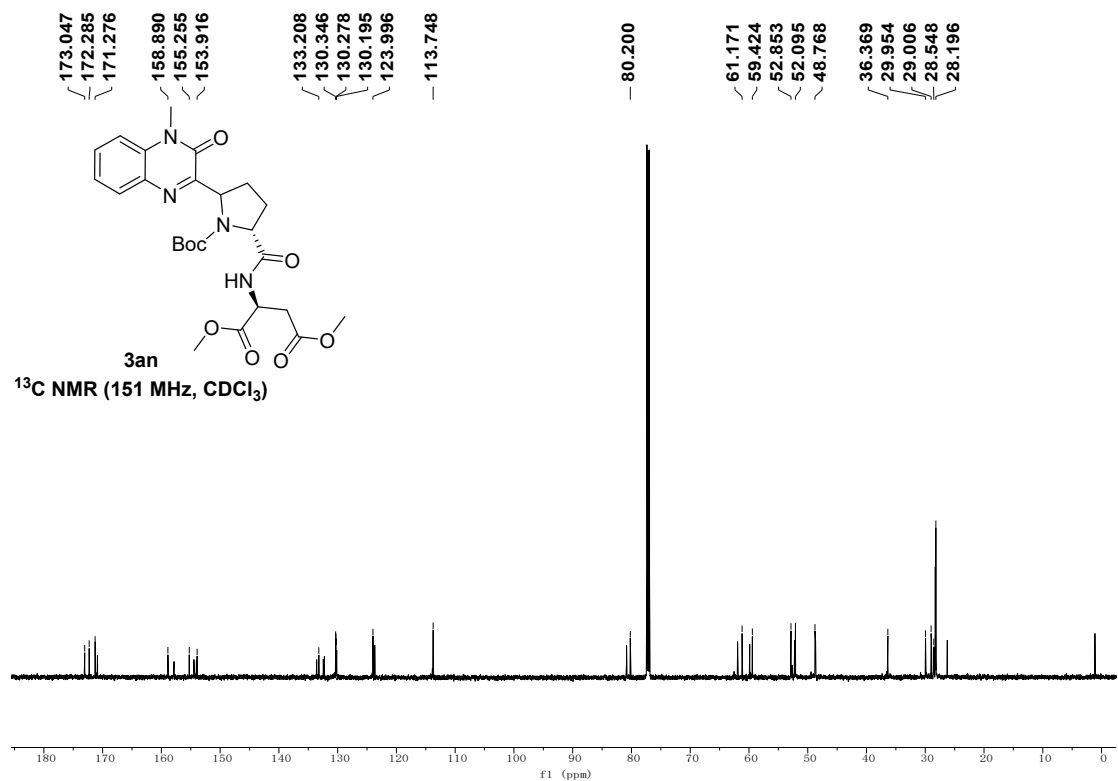

**<sup>1</sup>H NMR (600 MHz, CDCl<sub>3</sub>) spectrum of 3ao**

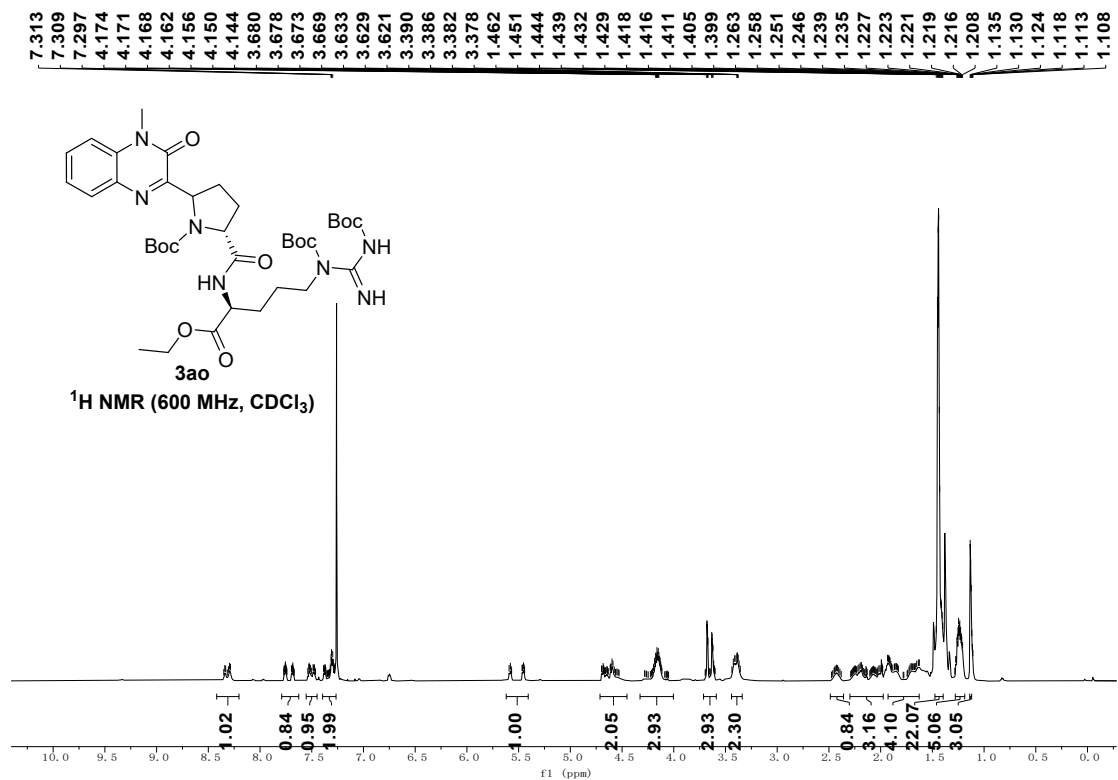

**<sup>13</sup>C NMR (151 MHz, CDCl<sub>3</sub>) spectrum of **3ao****

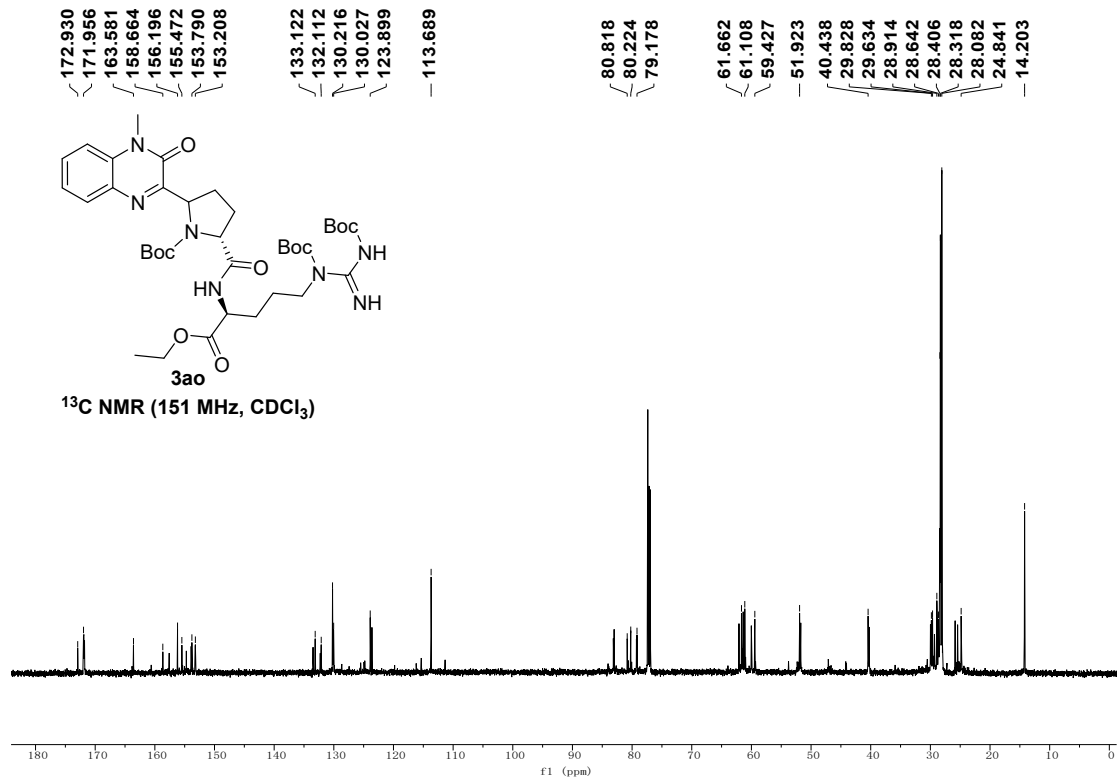

**<sup>1</sup>H NMR (600 MHz, CDCl<sub>3</sub>) spectrum of **3ap****

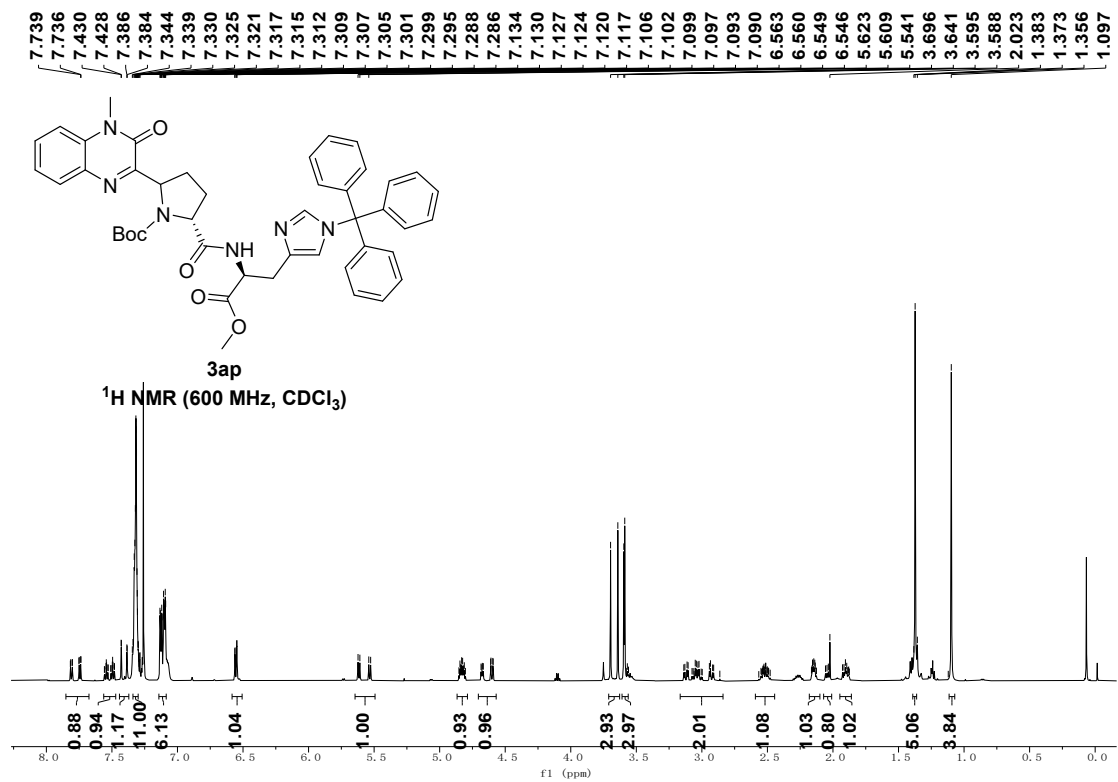

**<sup>13</sup>C NMR (151 MHz, CDCl<sub>3</sub>) spectrum of 3ap**

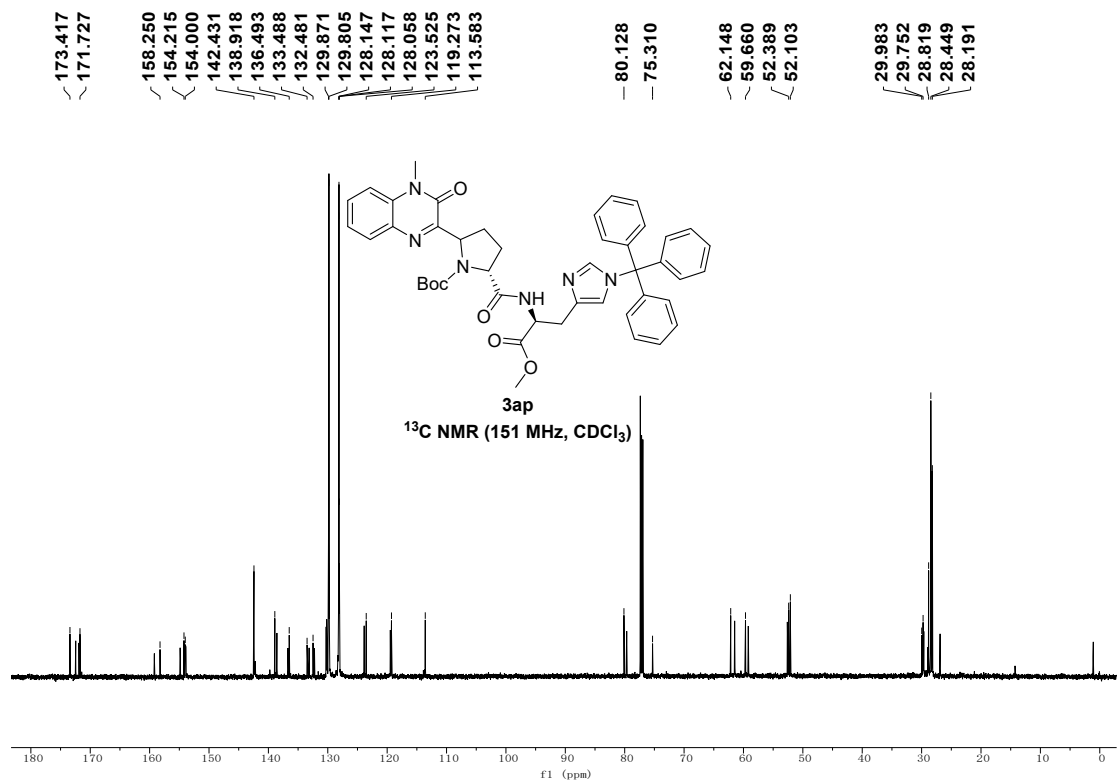

**<sup>1</sup>H NMR (600 MHz, CDCl<sub>3</sub>) spectrum of 3aq**

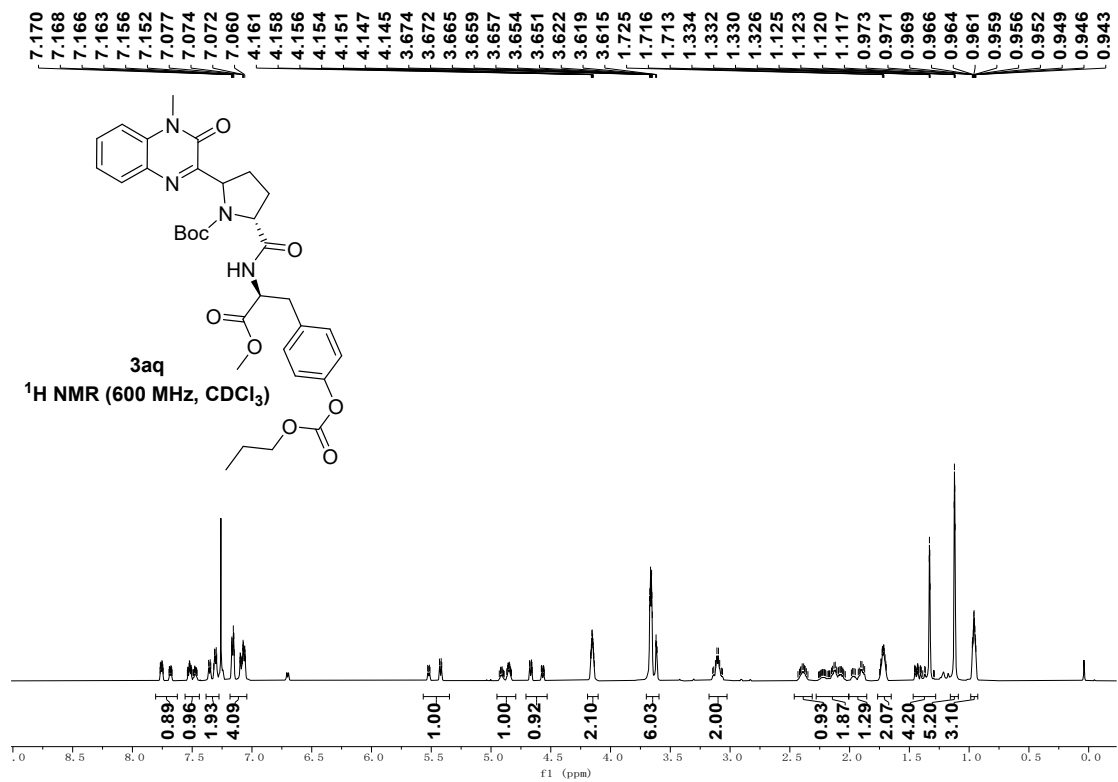

<sup>13</sup>C NMR (151 MHz, CDCl<sub>3</sub>) spectrum of **3aq**

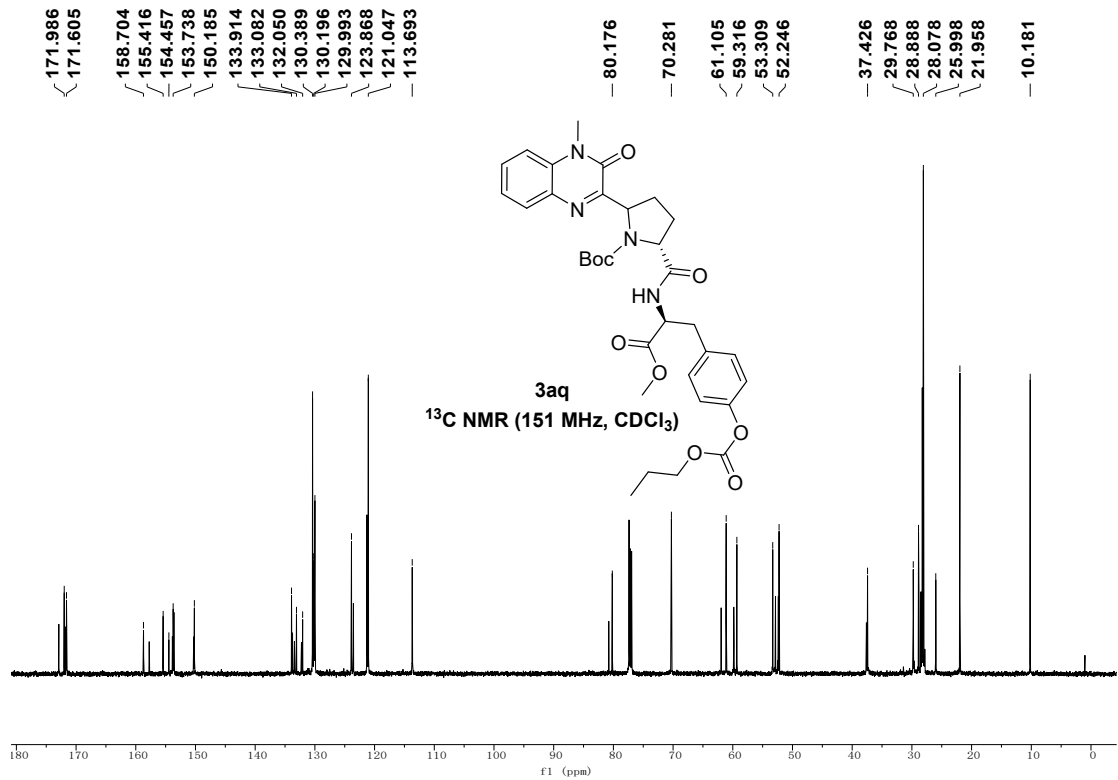

<sup>1</sup>H NMR (600 MHz, CDCl<sub>3</sub>) spectrum of **3ar**

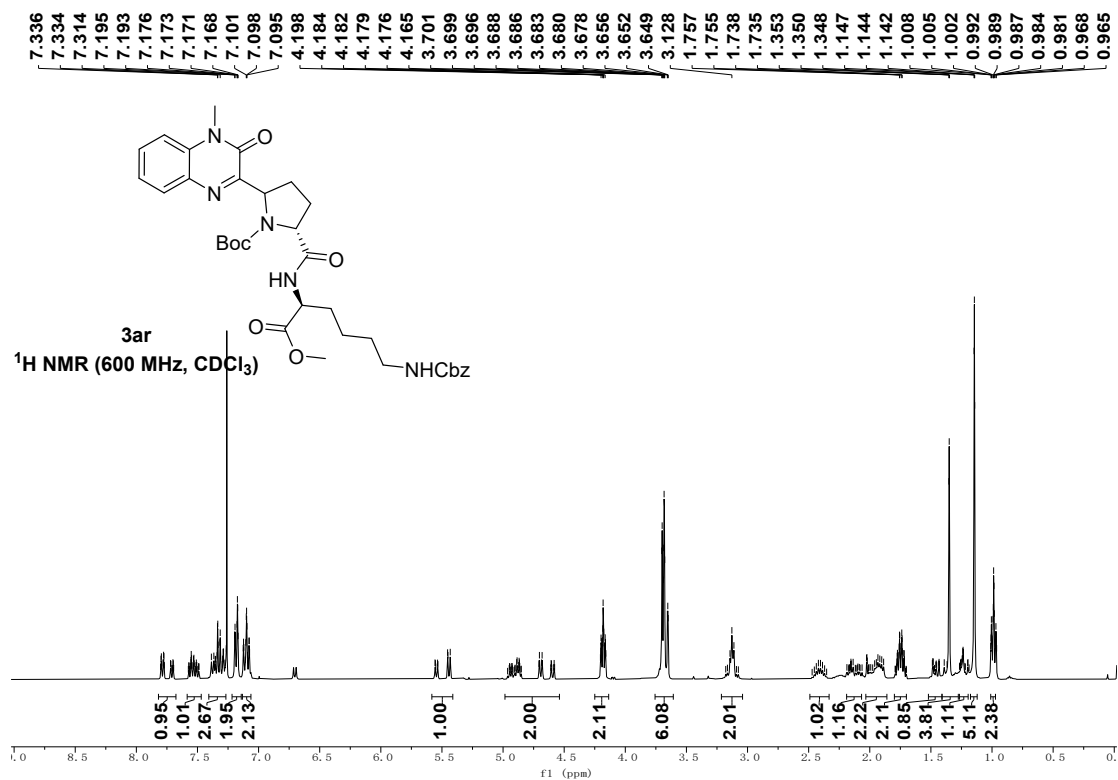

<sup>13</sup>C NMR (151 MHz, CDCl<sub>3</sub>) spectrum of **3ar**

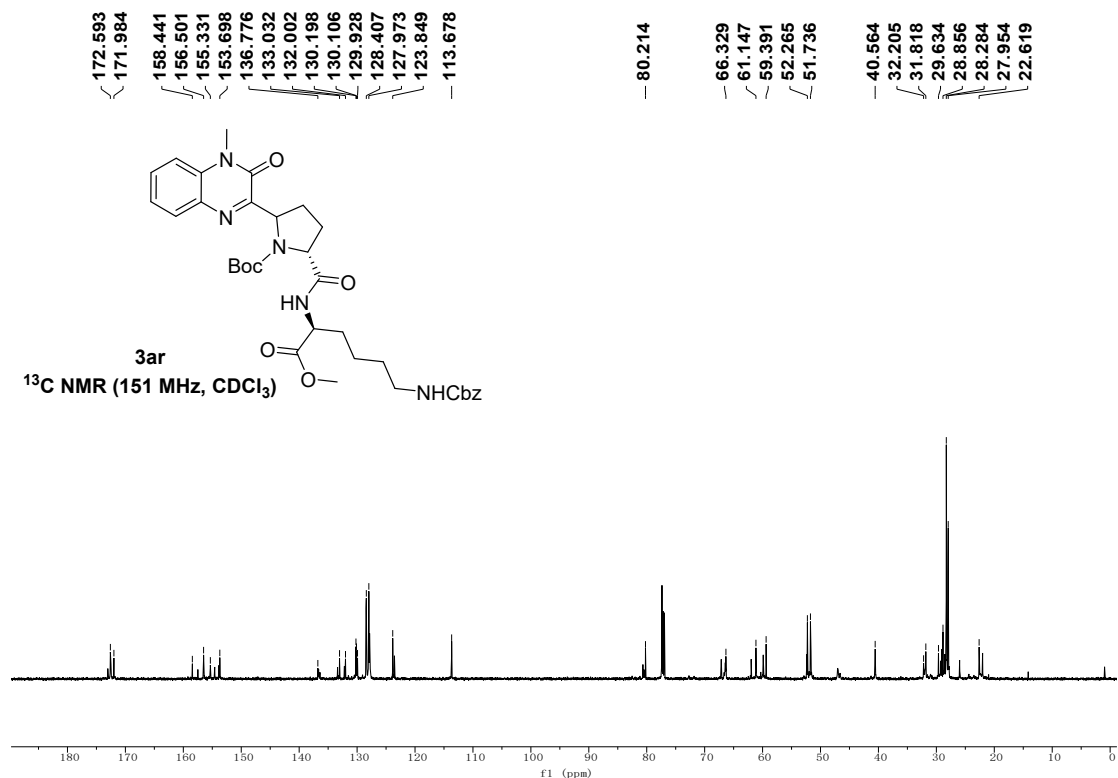

<sup>1</sup>H NMR (600 MHz, CDCl<sub>3</sub>) spectrum of **3ba**

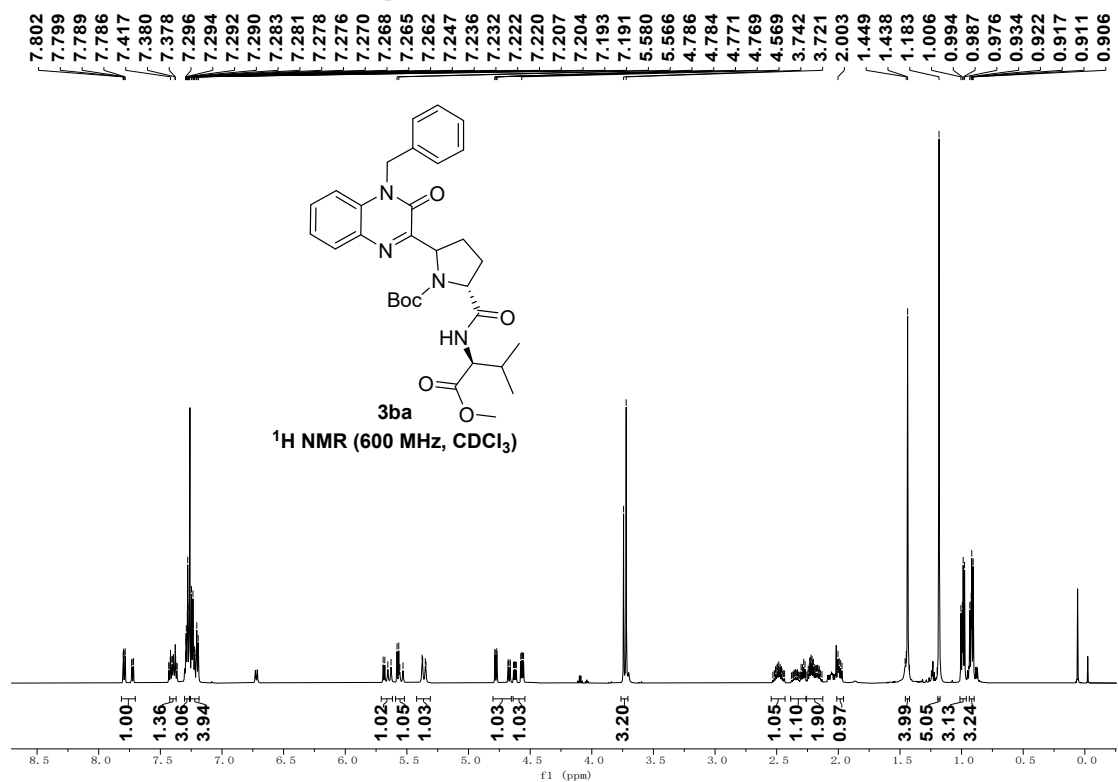

<sup>13</sup>C NMR (151 MHz, CDCl<sub>3</sub>) spectrum of **3ba**

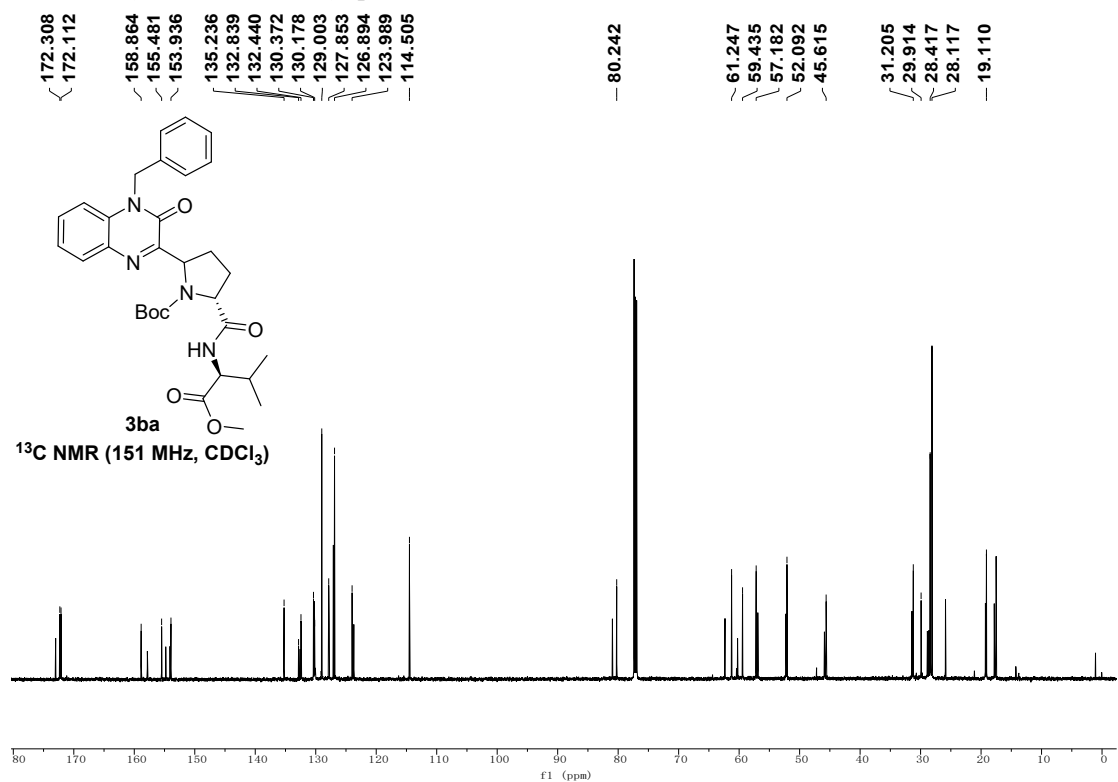

<sup>1</sup>H NMR (600 MHz, CDCl<sub>3</sub>) spectrum of **3ca**

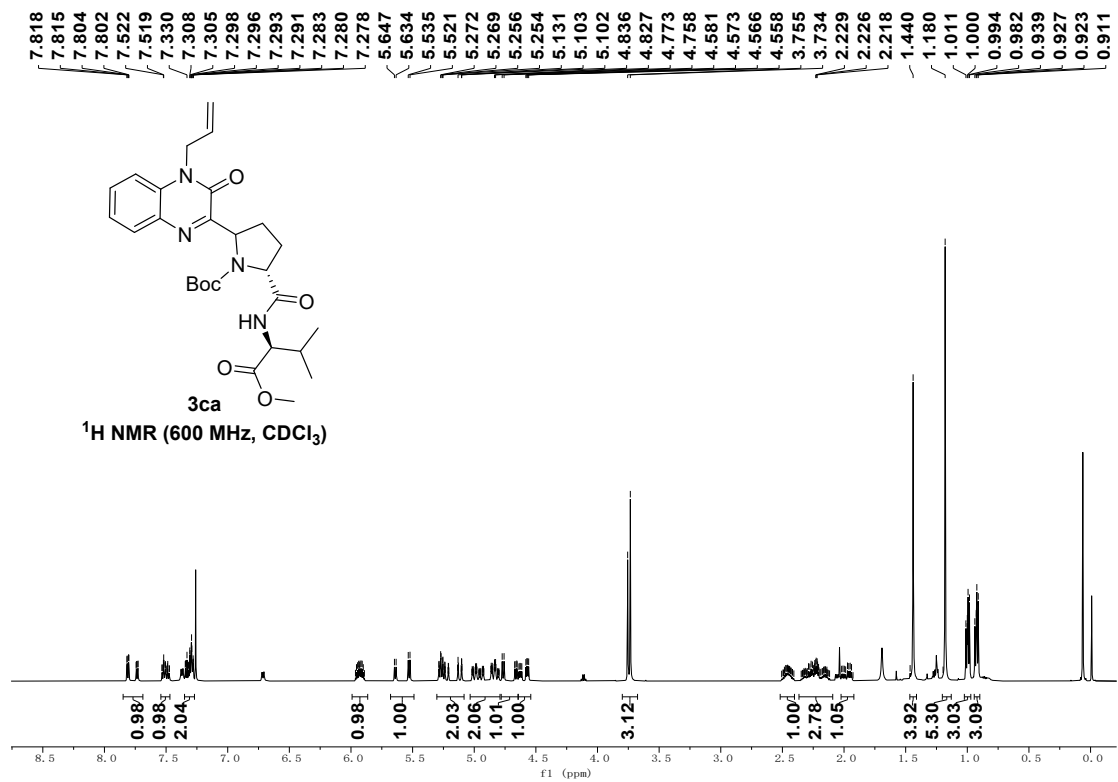

<sup>13</sup>C NMR (151 MHz, CDCl<sub>3</sub>) spectrum of **3ca**

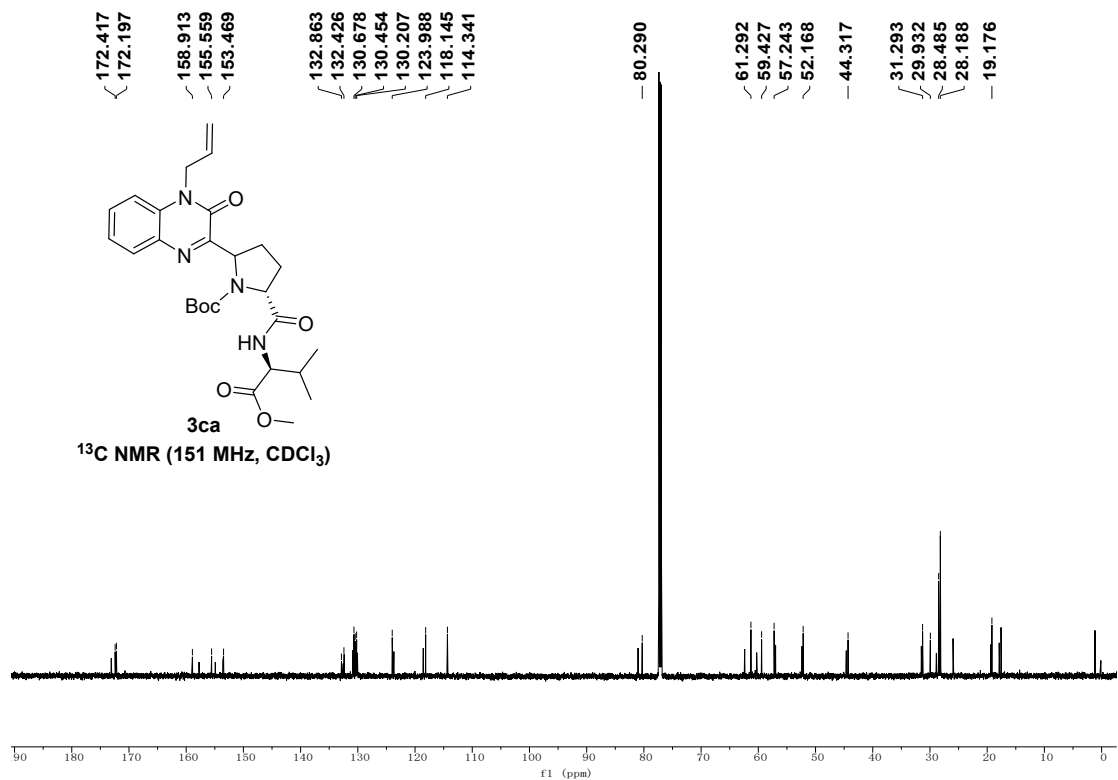

<sup>1</sup>H NMR (600 MHz, CDCl<sub>3</sub>) spectrum of **3da**

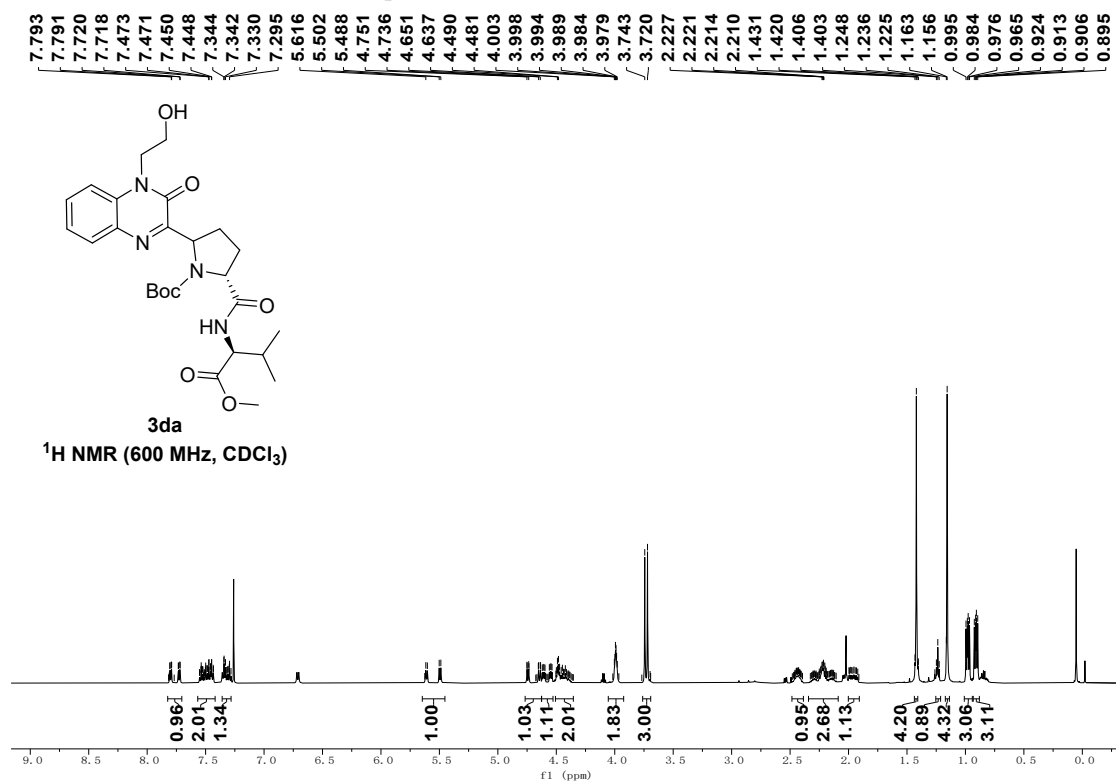

<sup>13</sup>C NMR (151 MHz, CDCl<sub>3</sub>) spectrum of **3da**

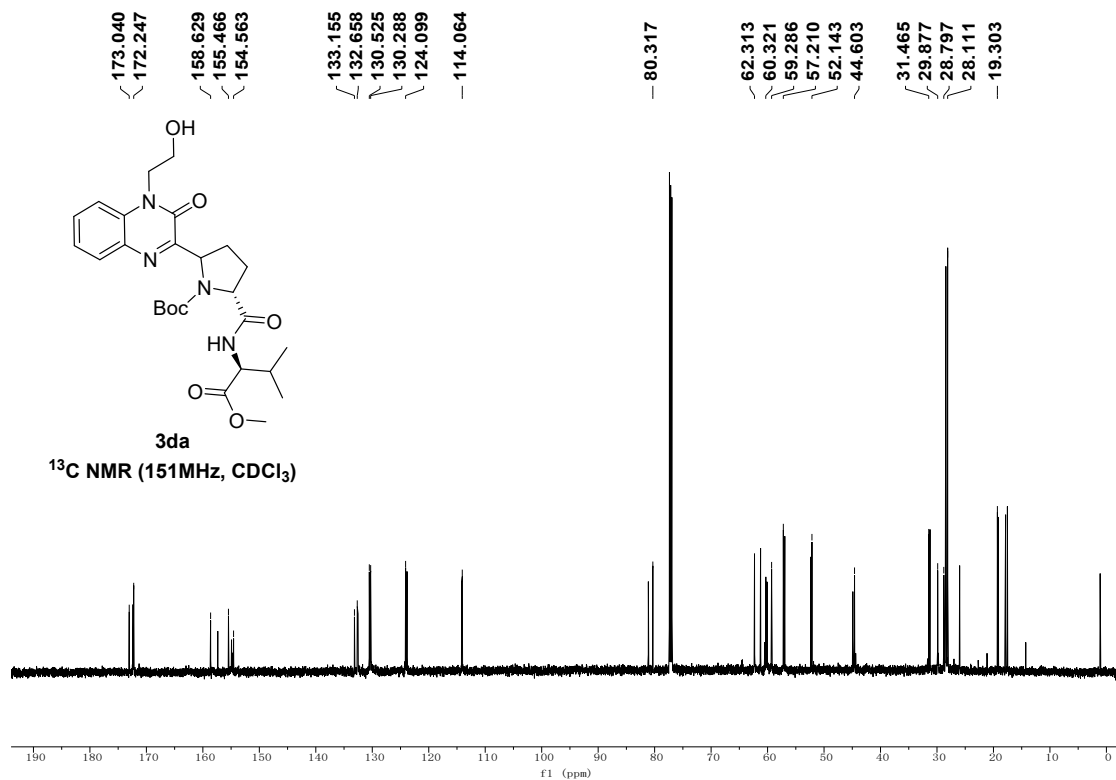

<sup>1</sup>H NMR (600 MHz, CDCl<sub>3</sub>) spectrum of **3ea**

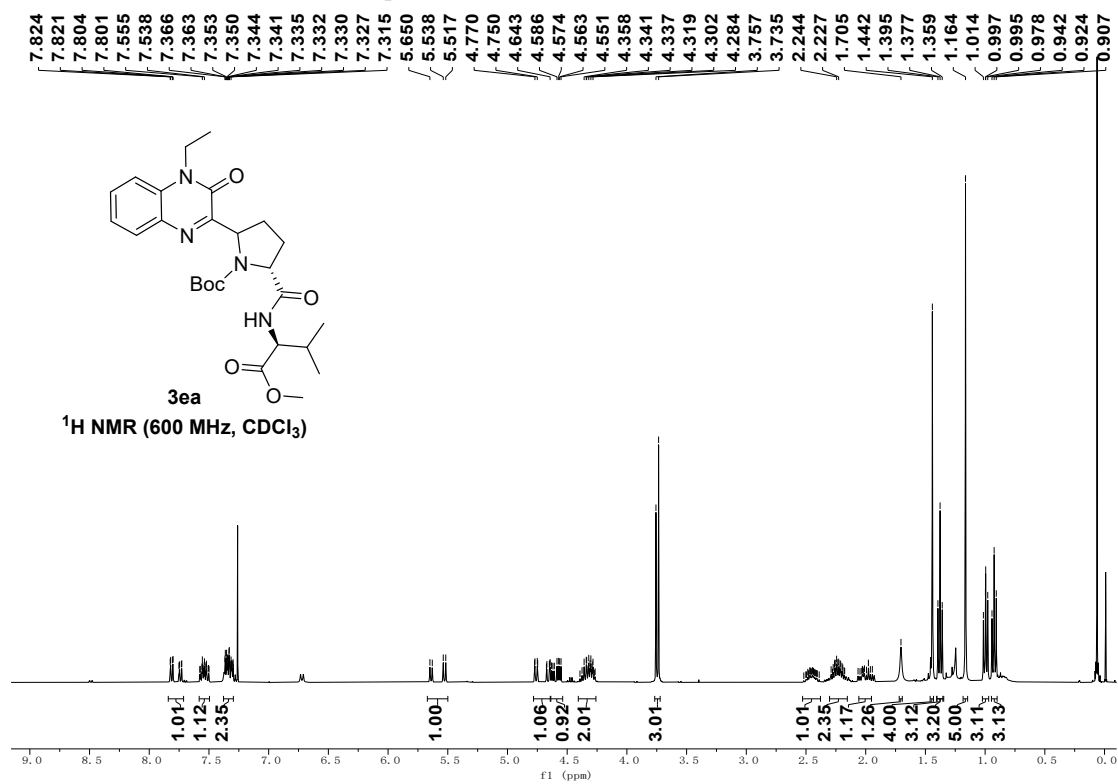

<sup>13</sup>C NMR (151 MHz, CDCl<sub>3</sub>) spectrum of **3ea**

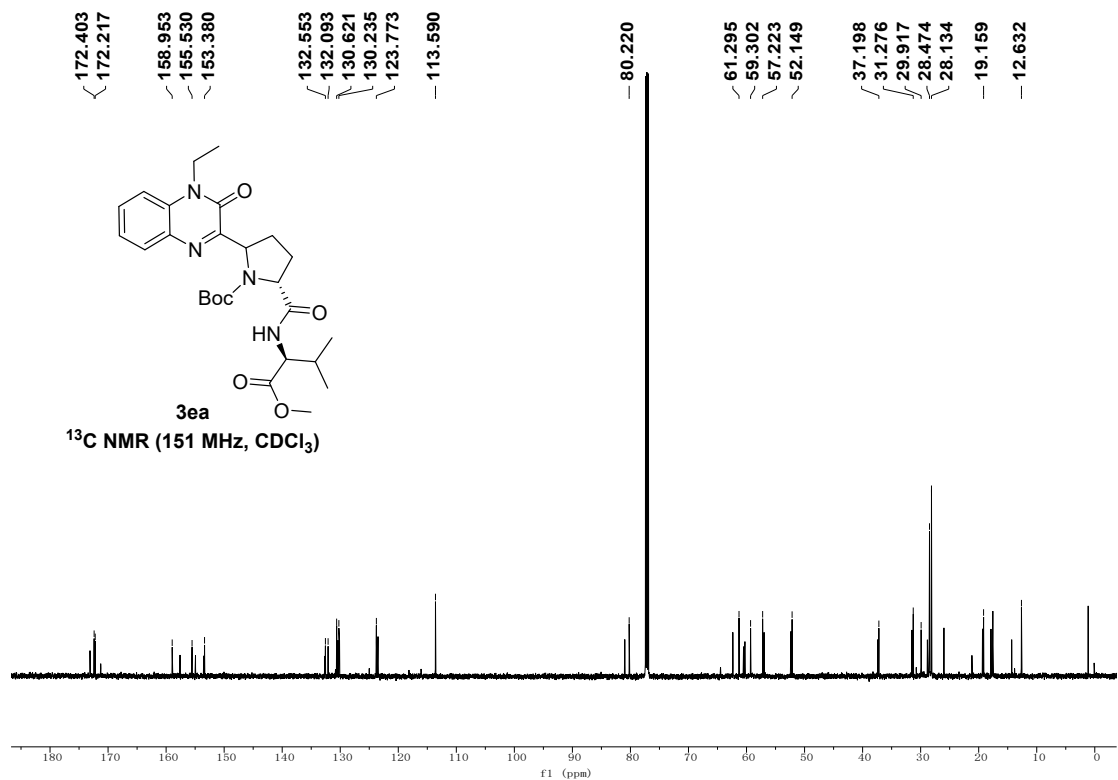

<sup>1</sup>H NMR (600 MHz, CDCl<sub>3</sub>) spectrum of **3fa**

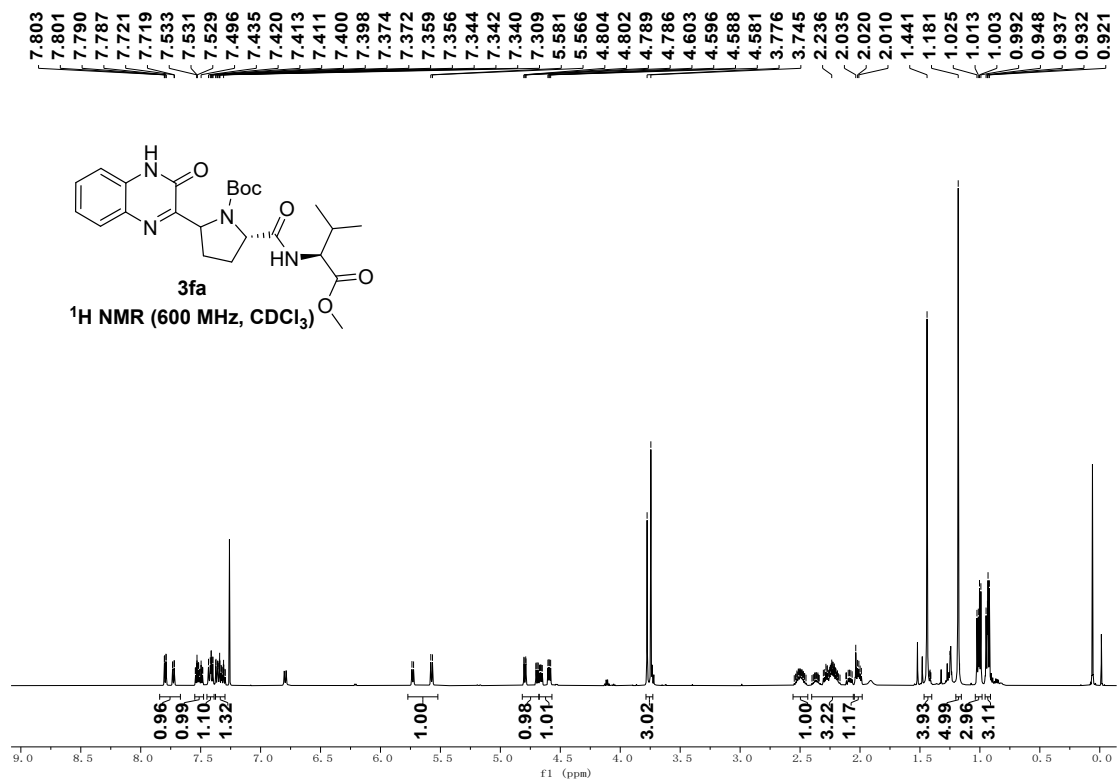

<sup>13</sup>C NMR (151 MHz, CDCl<sub>3</sub>) spectrum of **3fa**

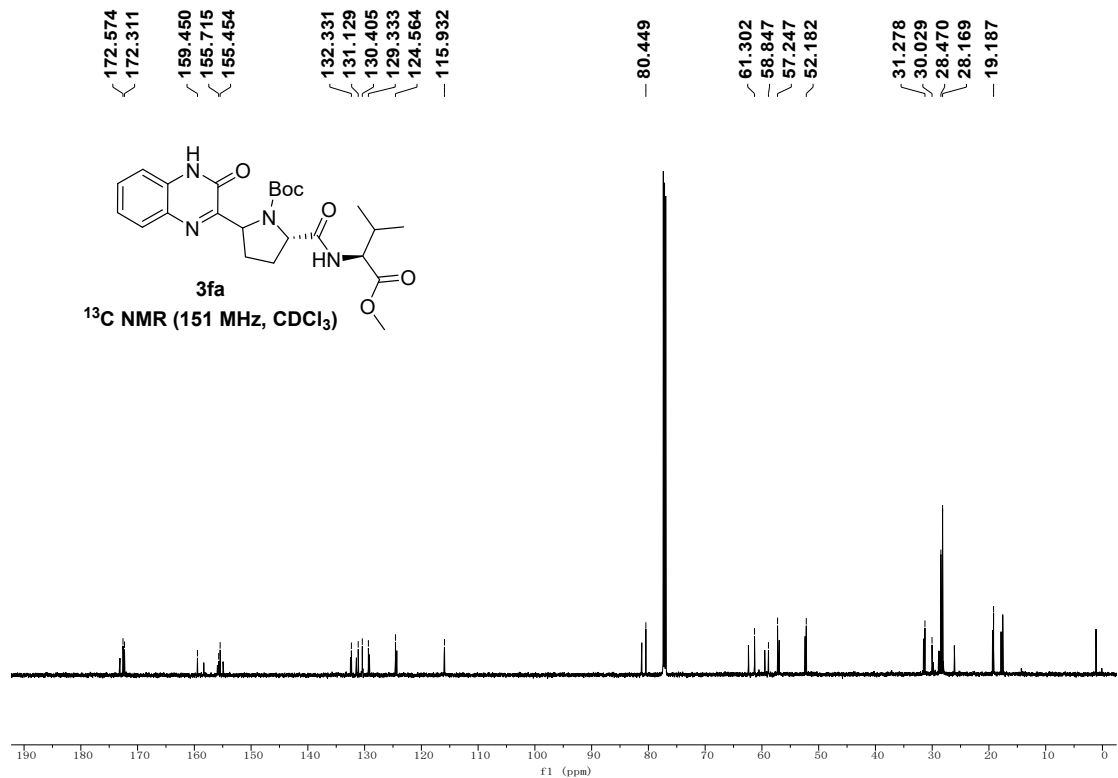

<sup>1</sup>H NMR (600 MHz, CDCl<sub>3</sub>) spectrum of **3ga**

7.612, 7.592, 7.589, 7.484, 7.469, 7.433, 7.429, 5.524, 4.779, 4.764, 4.651, 3.751, 3.747, 3.742, 3.705, 3.703, 3.701, 3.699, 3.696, 3.692, 2.246, 2.243, 2.239, 1.434, 1.430, 1.425, 1.170, 1.165, 1.160, 1.004, 1.000, 0.995, 0.992, 0.988, 0.984, 0.977, 0.973, 0.967, 0.961, 0.956, 0.934, 0.931, 0.926, 0.923, 0.919, 0.913, 0.908, 0.901, 0.897, 0.893

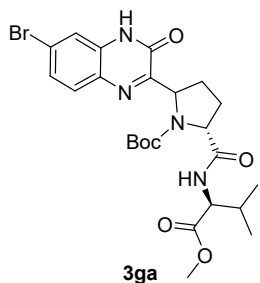

<sup>1</sup>H NMR (600 MHz, CDCl<sub>3</sub>)

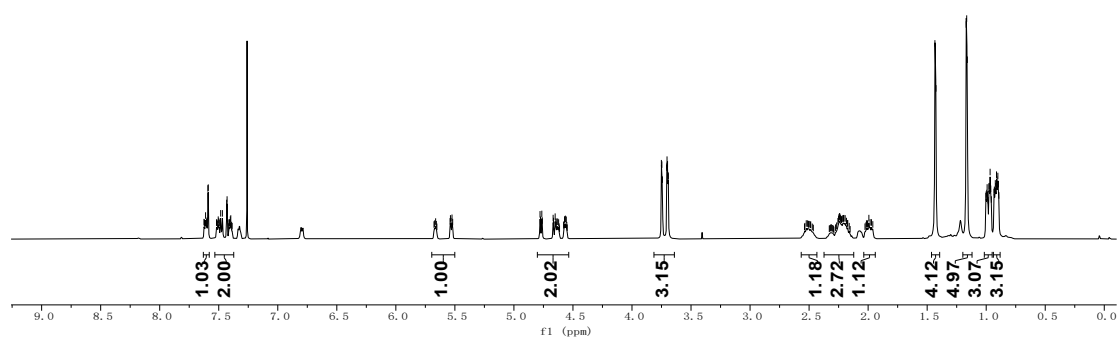

<sup>13</sup>C NMR (151 MHz, CDCl<sub>3</sub>) spectrum of **3ga**

172.449, 172.292, 159.932, 158.737, 155.259, 132.382, 131.030, 130.460, 127.787, 124.185, 118.643, 80.483, 61.163, 58.779, 57.277, 52.147, 31.160, 29.887, 28.812, 28.116, 19.131

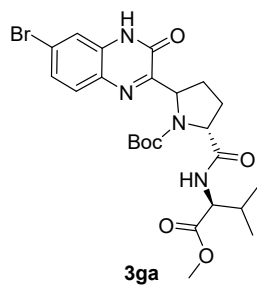

<sup>13</sup>C NMR (151 MHz, CDCl<sub>3</sub>)

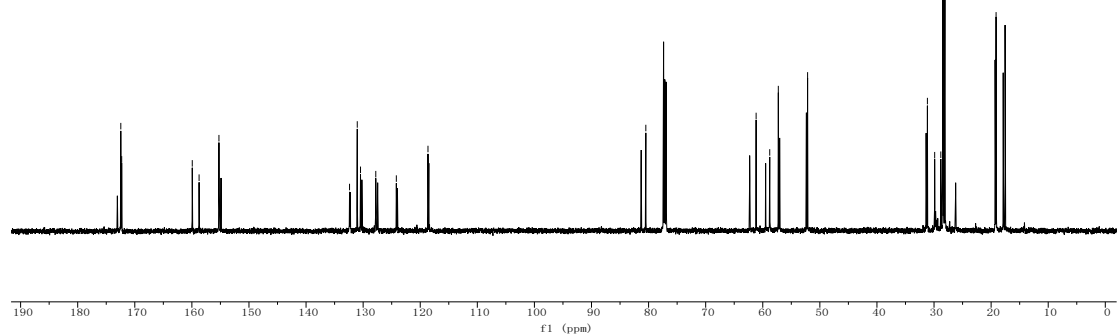

$^1\text{H}$  NMR (600 MHz,  $\text{CDCl}_3$ ) spectrum of **3ha**

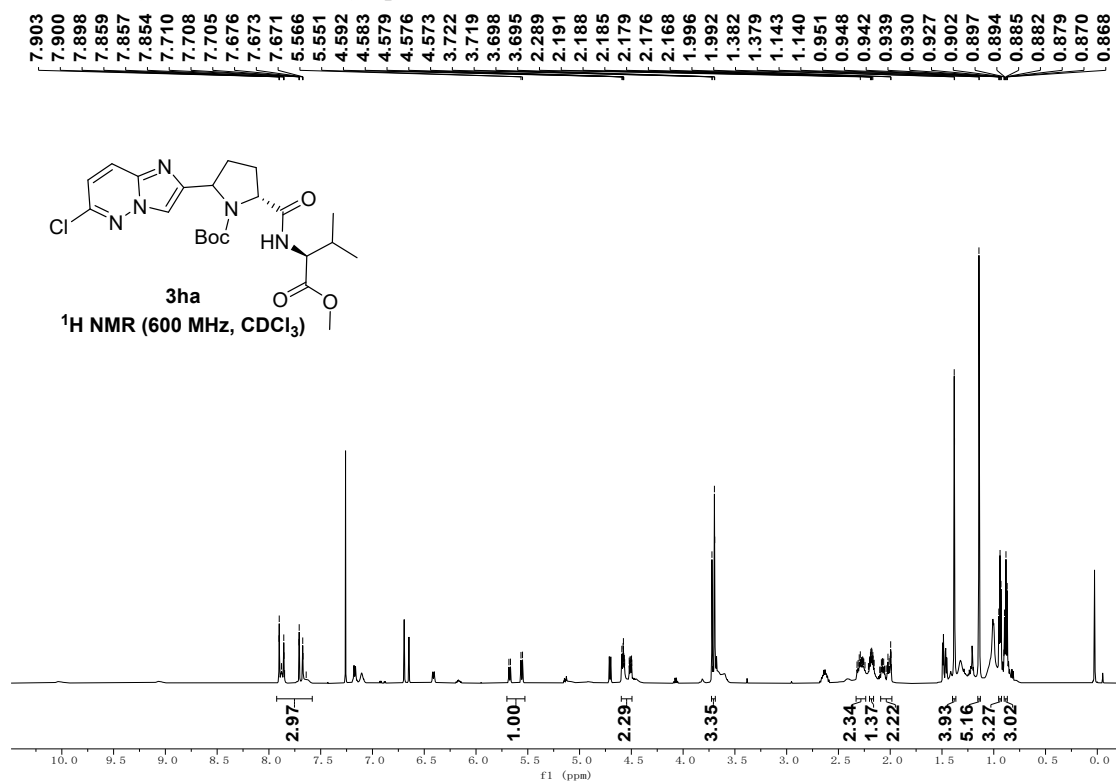

$^{13}\text{C}$  NMR (151 MHz,  $\text{CDCl}_3$ ) spectrum of **3ha**

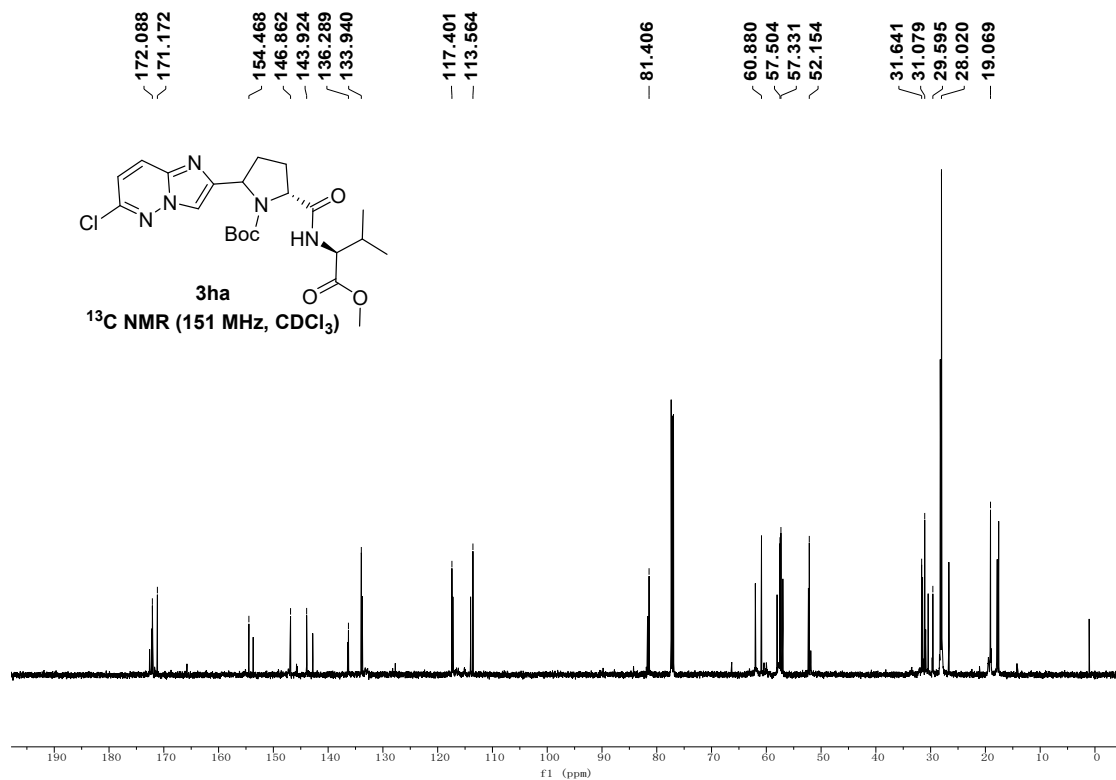

<sup>1</sup>H NMR (400 MHz, CDCl<sub>3</sub>) spectrum of **3ia**

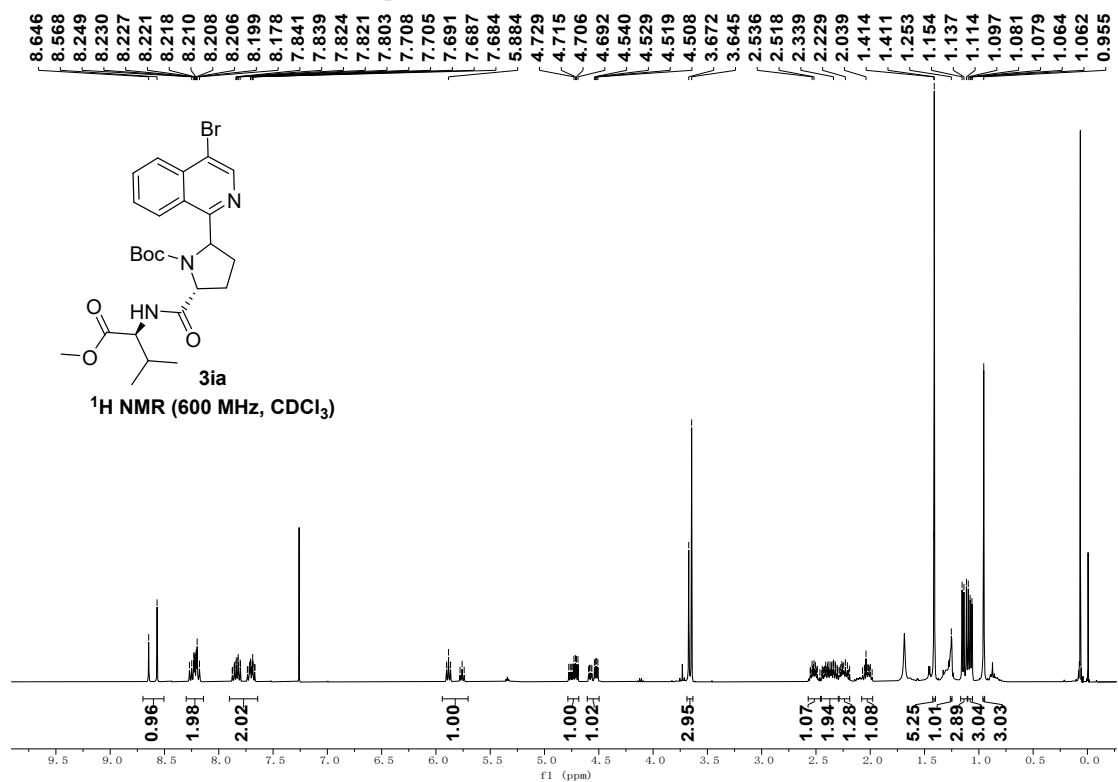

<sup>13</sup>C NMR (151 MHz, CDCl<sub>3</sub>) spectrum of **3ia**

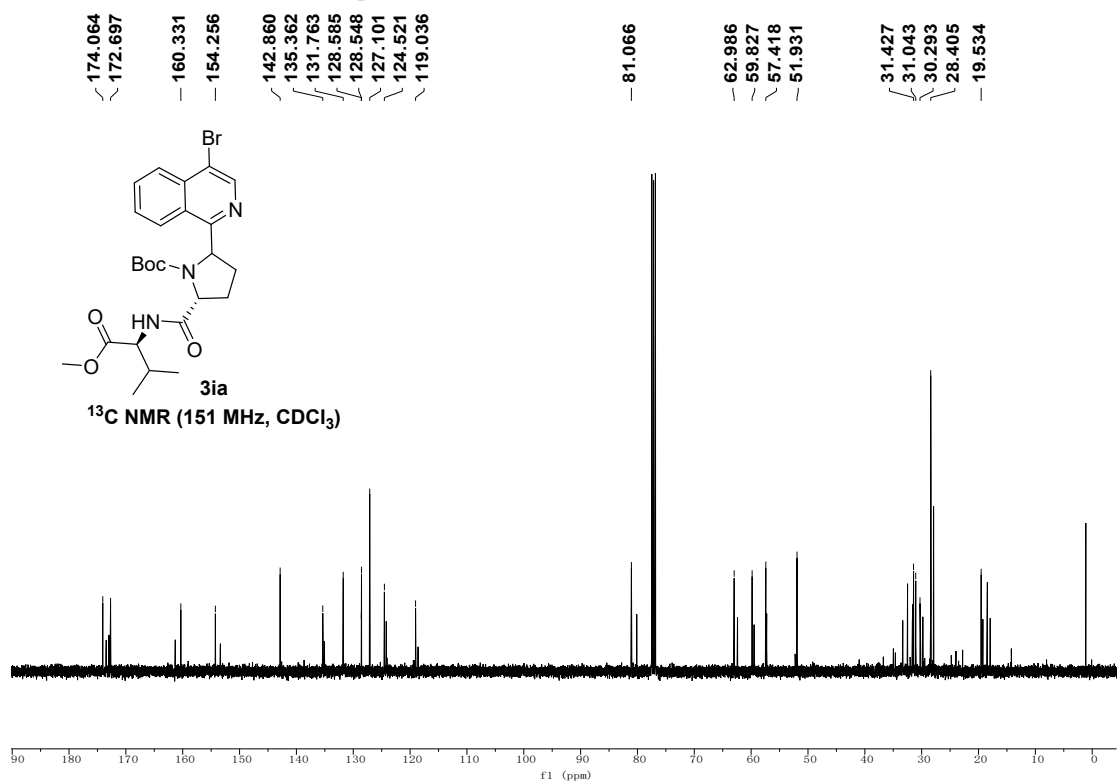

$^1\text{H}$  NMR (600 MHz,  $\text{CDCl}_3$ ) spectrum of **3ja**

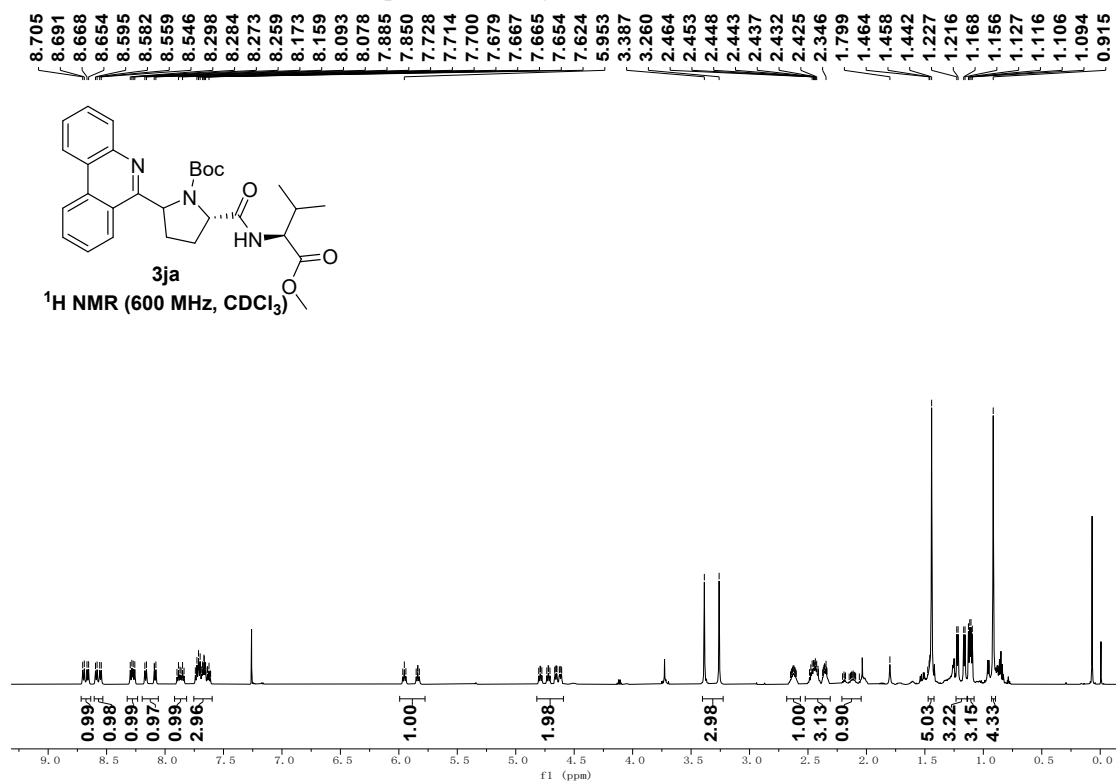

$^{13}\text{C}$  NMR (151 MHz,  $\text{CDCl}_3$ ) spectrum of **3ja**

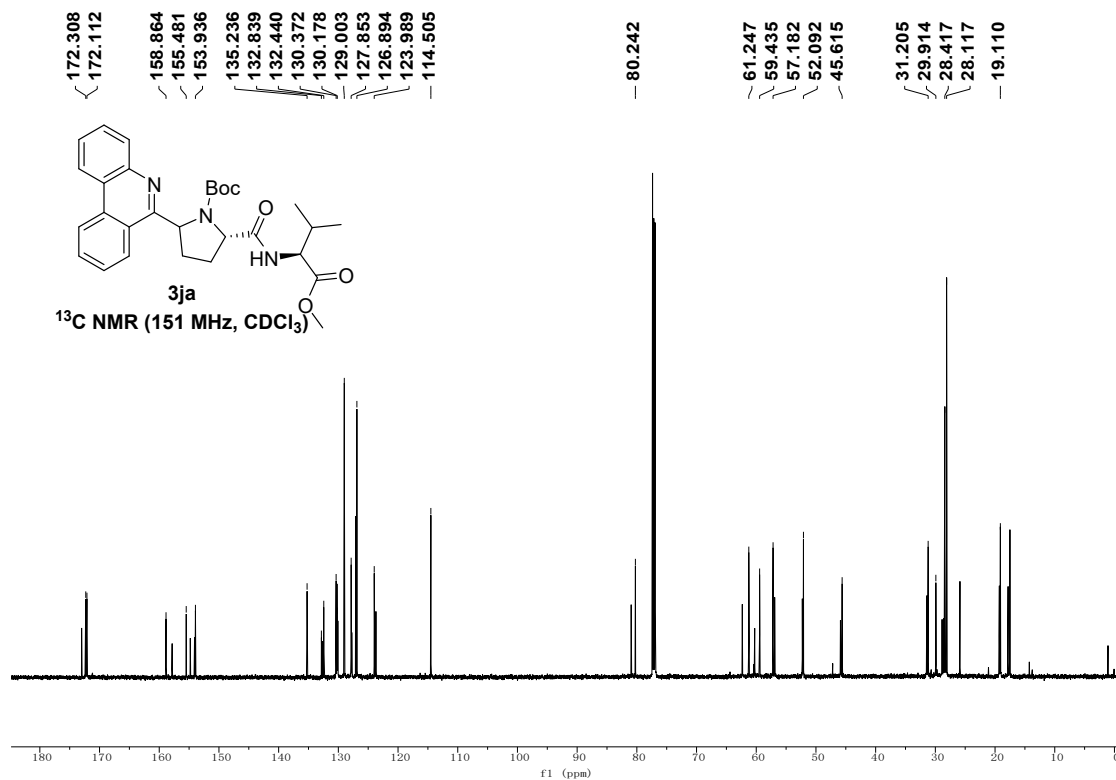

<sup>1</sup>H NMR (600 MHz, CDCl<sub>3</sub>) spectrum of **3ka**

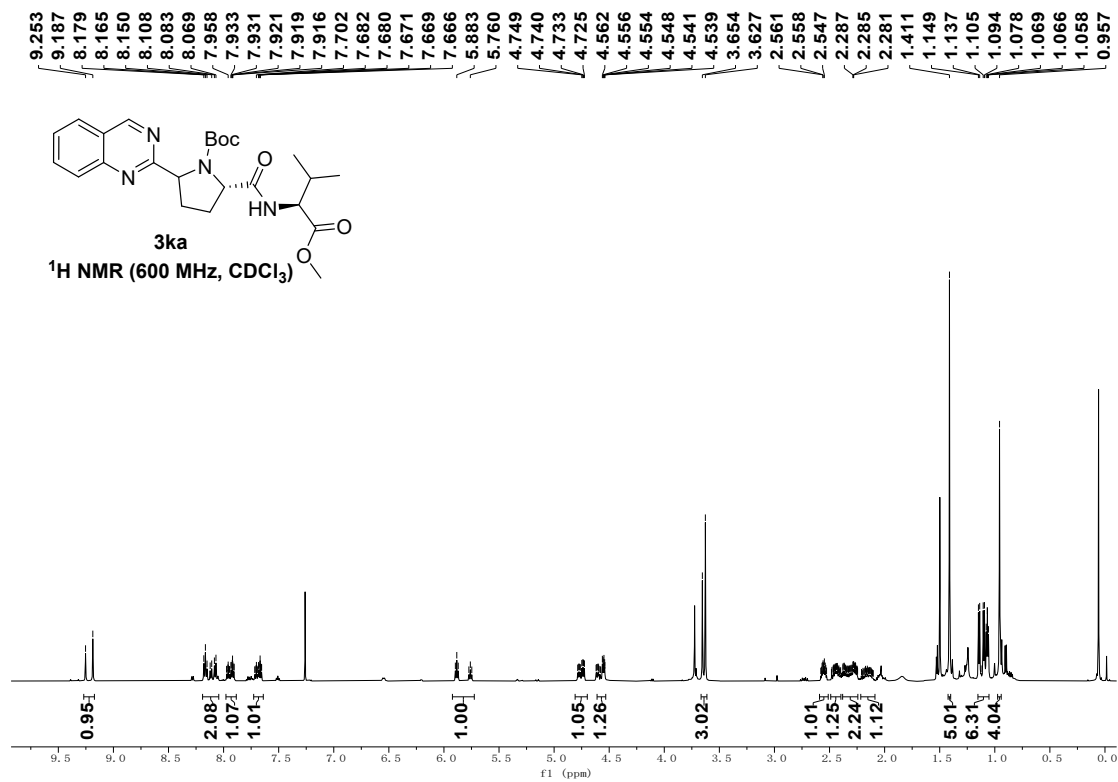

<sup>13</sup>C NMR (151 MHz, CDCl<sub>3</sub>) spectrum of **3ka**

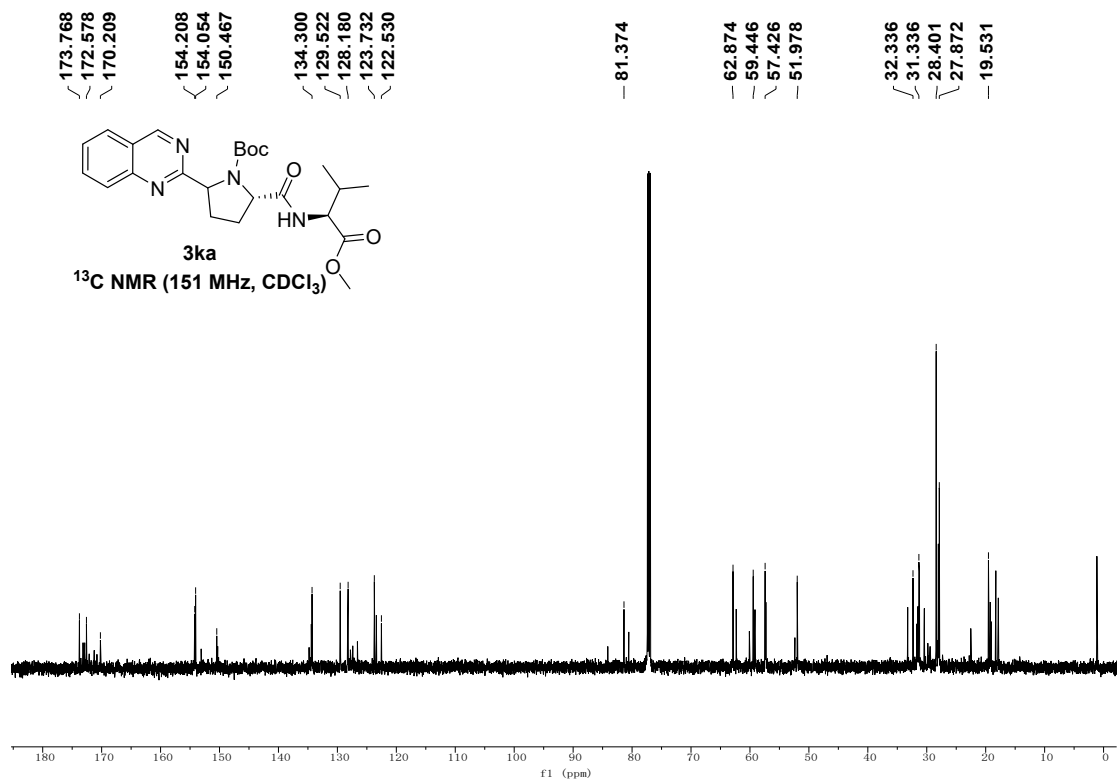

<sup>1</sup>H NMR (400 MHz, CDCl<sub>3</sub>) spectrum of **3as**

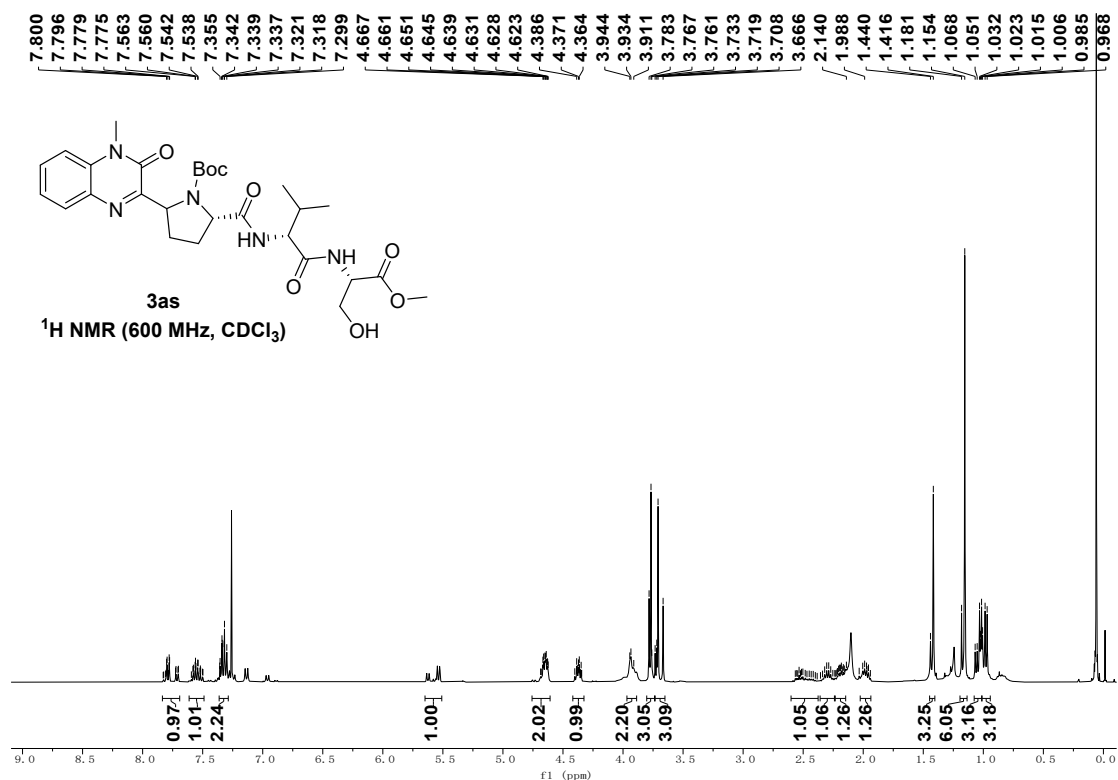

<sup>13</sup>C NMR (151 MHz, CDCl<sub>3</sub>) spectrum of **3as**

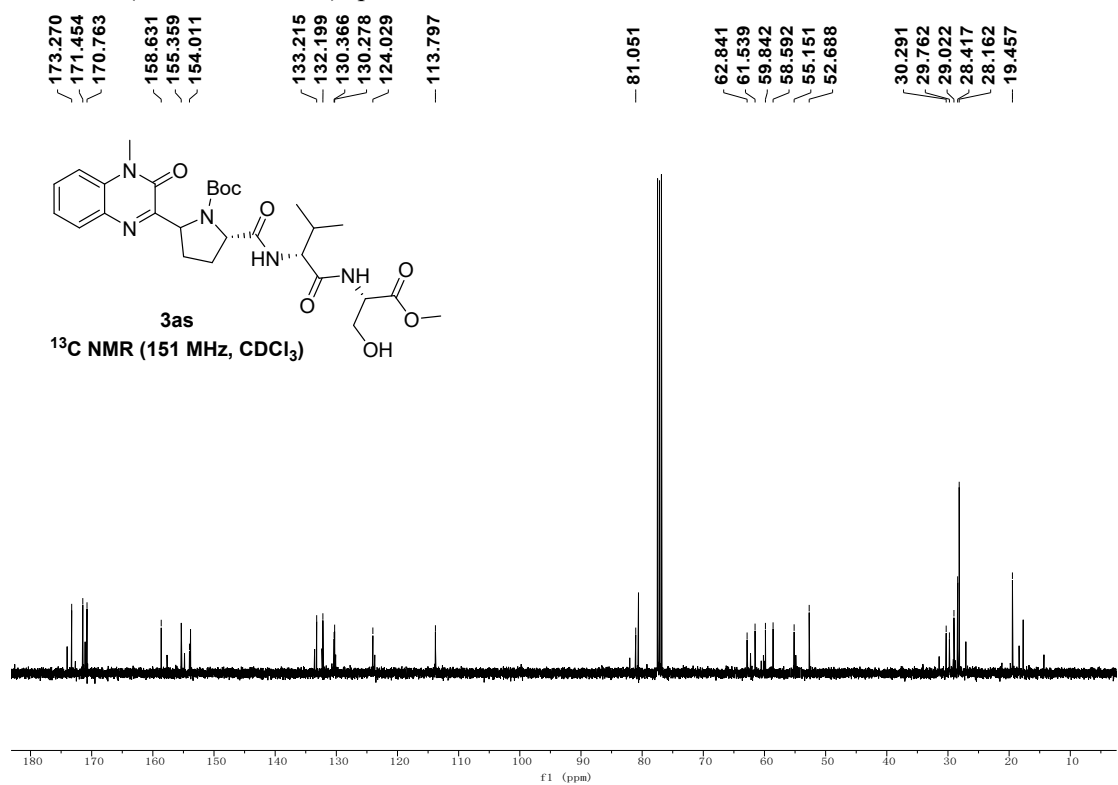

<sup>1</sup>H NMR (400 MHz, CDCl<sub>3</sub>) spectrum of **3at**

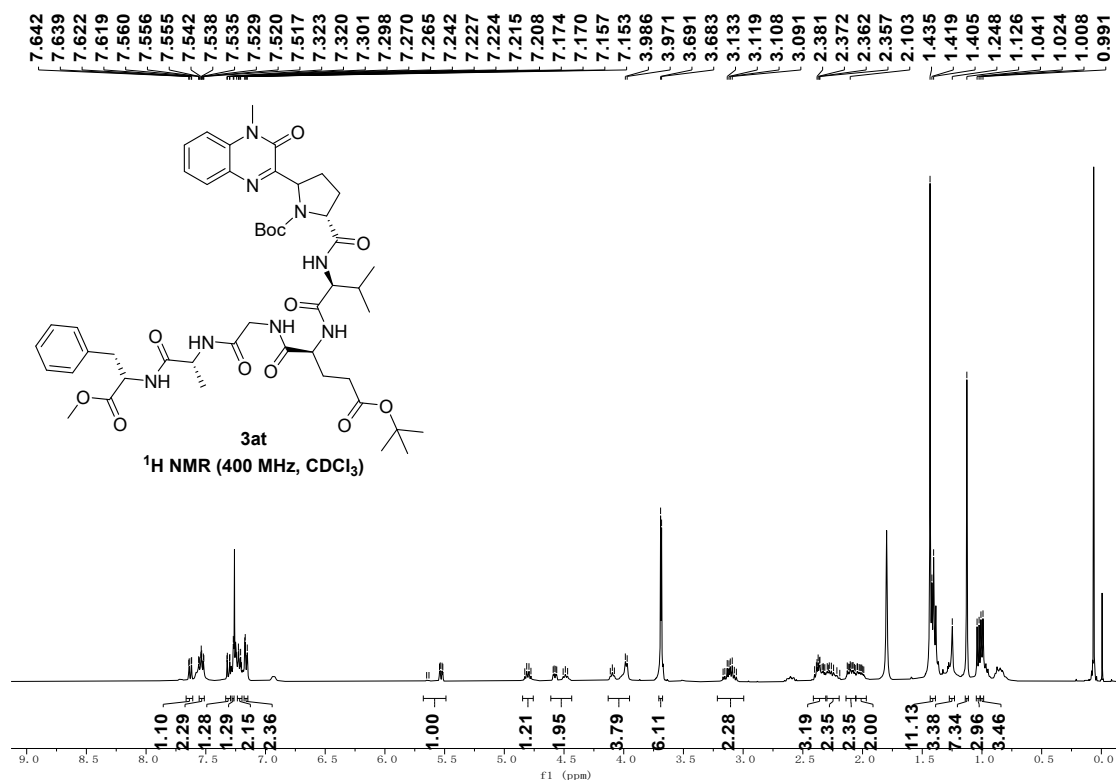

<sup>1</sup>H NMR (400 MHz, CDCl<sub>3</sub>) spectrum of **3au**

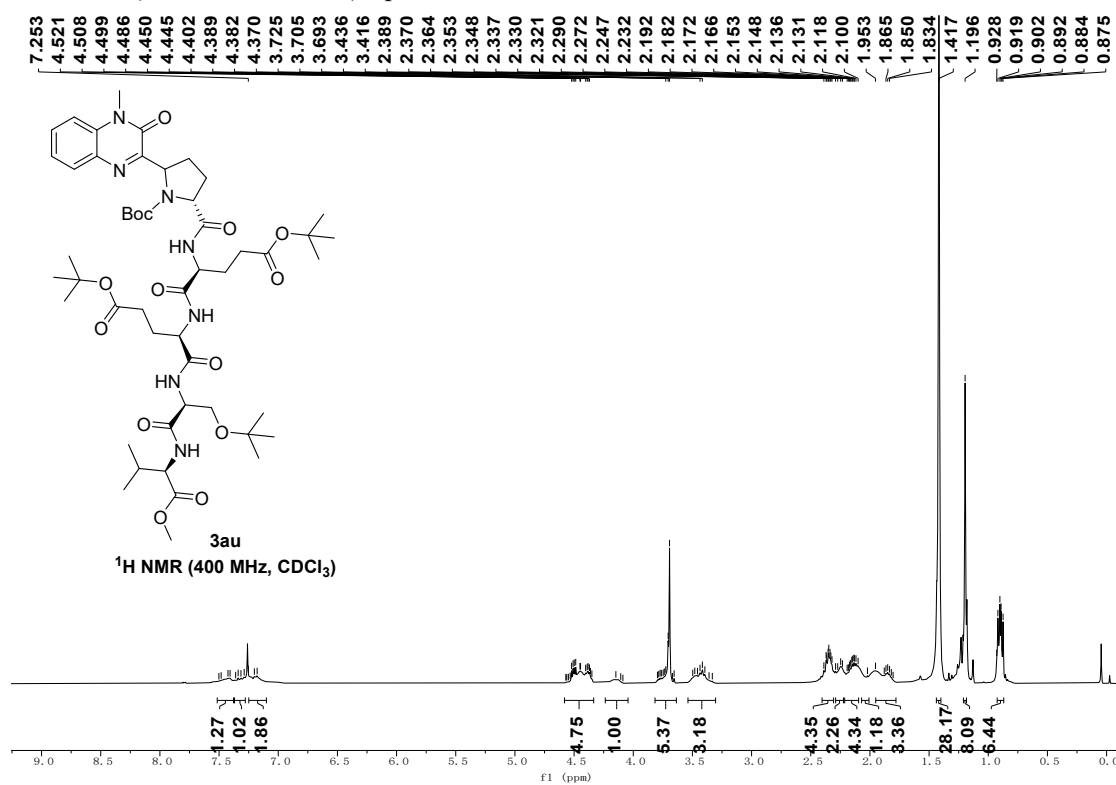

Supplement: d6gc00995f1.pdf [file d6gc00995f1.pdf]
